# Supplementary material for: Carboxylate phosphabetaine as a bifunctional organocatalyst for the intramolecular ring opening of oxetane
Source: Royal Society of Chemistry journal article supplement (doi:10.1039/c9qo00304e), 2019-01-01
Supplement: c9qo00304e1.pdf [file c9qo00304e1.pdf]

*Supporting information for*

# **Carboxylate Phosphobetaine as Bifunctional Organocatalyst for the Intramolecular Ring Opening of Oxetane**

Dongyang Xu, Hongbo Wei, Yanxia Zhen, Yu-Qi, Gao, Ruoxin Li, Xingzhou Li,  
Yupeng He, Zhong Zhang, Weiqing Xie

## **Table of Contents**

|                                                                            |             |
|----------------------------------------------------------------------------|-------------|
| <b>1. General information .....</b>                                        | <b>S-2</b>  |
| <b>2. Screening Chiral catalyst for Ring Opening of Oxetane 3a.....</b>    | <b>S-3</b>  |
| <b>4. General procedure for the ring opening of oxetane .....</b>          | <b>S-15</b> |
| <b>5. Derivatization of the oxazolidin-2-one product.....</b>              | <b>S-24</b> |
| <b>6. Mechanism study of intramolecular ring opening of oxetanes .....</b> | <b>S-27</b> |
| <b>7. Preparation of catalyst.....</b>                                     | <b>S-28</b> |
| <b>8. Copies of spectrums .....</b>                                        | <b>S-31</b> |
| <b>9. Theoretical Computation Section .....</b>                            | <b>S-81</b> |

## 1. General information

Unless otherwise noted, reagents were obtained from commercial sources and used without further purification. Non-aqueous reaction were conducted under an inert atmosphere of argon in flame-dried glassware. Anhydrous solvent were treated as follow: tetrahydrofuran and diethyl ether were distilled from sodium under argon atmosphere, dichloromethane and toluene was distilled distilled from calcium hydride under argon atmosphere. Anhydrous chloroform, acetonitrile and ethyl acetate were commercial available. Thin layer chromatography was conducted on Merck 60 F254 pre-coated silica gel plates. Column chromatography was carried out by normal silica gel (40-60  $\mu\text{m}$ , 200-400 mesh, Silicycle P60). NMR data including  $^1\text{H}$  NMR, or  $^{13}\text{C}$  NMR spectra were recorded on Agilent 500 and Agilent 400.  $^1\text{H}$  NMR Chemical shifts were reported in ppm from the solvent resonanceas the internal standard ( $\text{CDCl}_3$ : 7.26 ppm;  $d_6$ -Acetone: 2.05 ppm;  $d_6$ -DMSO: 2.50 ppm).  $^{13}\text{C}$  NMR chemical shifts were reported in ppm relative to the solvent ( $\text{CDCl}_3$ :77.16 ppm;  $d_6$ -Acetone: 29.8 ppm;  $d_6$ -DMSO: 39.52 ppm). Low mass spectra were measured on a Shimadzu LCMS-2010EV mass spectrometer (ESI). High resolution mass spectra were obtained from IonSpec 4.7 Tesla FTMS mass spectrometer (MALDI), Bruker APEXIII 7.0 TESLA FTMS (EI)

## 2. Screening of Other Catalysts for Ring Opening of Oxetane **3a**<sup>a</sup>

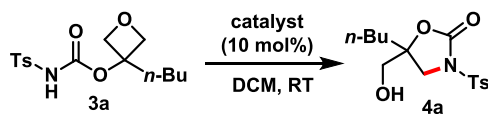

| entry | catalyst                                                    | yield (%) <sup>b</sup> | ee (%) <sup>c</sup> |
|-------|-------------------------------------------------------------|------------------------|---------------------|
| 1     | Ph <sub>4</sub> P <sup>+</sup> •OAC ( <b>C8</b> )           | 75                     | NA                  |
| 2     | <i>n</i> -Bu <sub>4</sub> N <sup>+</sup> •OAC ( <b>C9</b> ) | 76                     | NA                  |
| 3     | <b>C10</b>                                                  | 70                     | 4                   |
| 4     | <b>C11</b>                                                  | 49                     | 3                   |
| 5     | <b>C12</b>                                                  | 57                     | 6                   |
| 6     | <b>C13</b>                                                  | 66                     | --                  |
| 7     | <b>C14</b>                                                  | 62                     | 6                   |

[a] Reaction conditions: Reactions were performed with **3a** (0.05 mmol) and the catalyst (10 mol %) in solvent (0.5 mL), which was stirred at RT. [b] Isolated yields. [c] Determined by HPLC analysis.

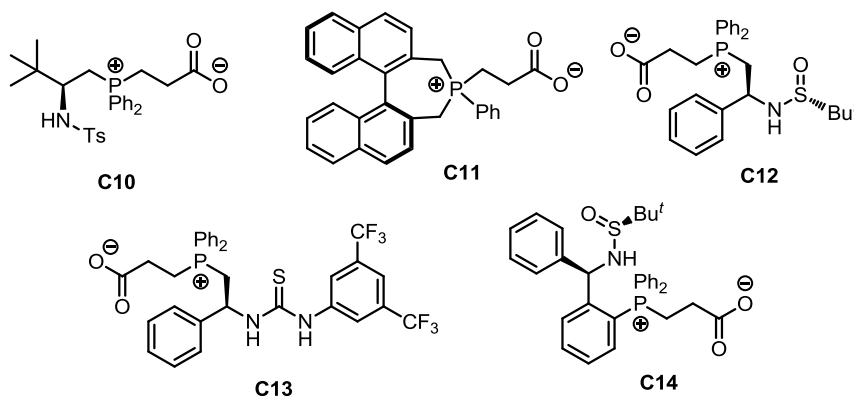

## 3. General procedure for the preparation of substrates

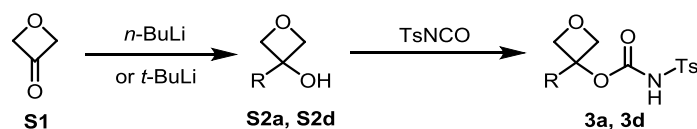

**General procedure A<sup>1</sup>:** To a solution of *Oxetan-3-one* (10 mmol, 1.0 equiv) in dry THF (10 mL) was added BuLi (12 mmol, 1.2 equiv) slowly at -78°C and the reaction mixture was stirred at this temperature for 4 h. Saturated NH<sub>4</sub>Cl (aq) (10 mL) was added. The organic layer was extracted with ethyl acetate (3×10 mL). The organic layers were combined, dried over anhydrous Na<sub>2</sub>SO<sub>4</sub>, and concentrated under reduced pressure. The residue was purified by silica gel column chromatography (ethyl

1. Ponzano S, Berteotti A, Petracca R, Vitale R, Mengatto L. *Journal of Medicinal Chemistry* **2014**, 57, (23), 10101-10111.

acetate/petroleum ether = 1/5, v/v) to afford the desired product **S2**.

To a solution of **S2** (1 mmol, 1.0 equiv) in dry DMF (4 mL) was added Tosyl isocyanate (1.1 mmol, 1.1 equiv) slowly. And the reaction mixture was stirred at room temperature for 30min, water (10 mL) was added. The organic layer was extracted with ethyl acetate (4×10 mL). The organic layers were combined and washed with brine (3×30 mL), filtered, dried over anhydrous Na<sub>2</sub>SO<sub>4</sub>, and concentrated under reduced pressure. The residue was purified by silica gel column chromatography (ethyl acetate/petroleum ether = 1/3 to 1/1, v/v) to afford the desired product **3**.

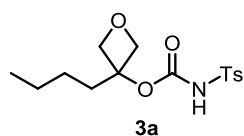

This compound was prepared according to the general procedure A as a white solid (265 mg, 81% yield in 1 mmol scale)

$R_f$  = 0.48, Petroleum ether/EtOAc = 1:1; <sup>1</sup>H NMR (500 MHz, CDCl<sub>3</sub>) δ 7.89 (d,  $J$  = 8.4 Hz, 2H), 7.35 (d,  $J$  = 8.1 Hz, 2H), 4.65 (d,  $J$  = 7.7 Hz, 2H), 4.47 (d,  $J$  = 8.2 Hz, 2H), 2.45 (s, 3H), 2.10-1.93 (m, 2H), 1.33-1.18 (m, 2H), 1.19-1.05 (m, 2H), 0.83 (t,  $J$  = 7.3 Hz, 3H).

<sup>13</sup>C NMR (126 MHz, CDCl<sub>3</sub>) δ 148.95, 145.64, 135.80, 130.08, 128.63, 82.57, 80.43, 34.01, 25.36, 22.86, 22.08, 14.24.

HRMS (ESI) exact mass calcd for C<sub>15</sub>H<sub>22</sub>NO<sub>5</sub>S [M+H]<sup>+</sup>:  $m/z$  328.1214 [M+H]<sup>+</sup>, found:  $m/z$  328.1213.

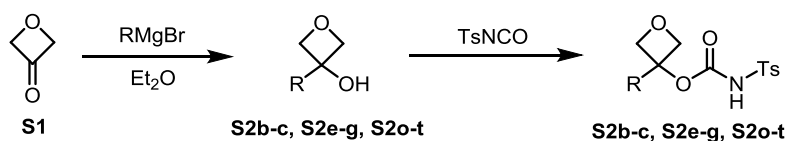

**General procedure B<sup>2</sup>:** To a solution of *Oxetan-3-one* (10 mmol, 1.0 equiv) in dry THF (10 mL) was added corresponding *Grignard reagent* 12 mL (1 M in Et<sub>2</sub>O) slowly at 0°C and the reaction mixture was warmed to room temperature. After stirred at this temperature for 2 h, saturated NH<sub>4</sub>Cl (aq) (10 mL) was added. The organic

2. Yang W, Sun J. *Angew. Chem., Int. Ed.* **2016**, 55, 1868-1871.

layer was extracted with ethyl acetate (3×10 mL). The organic layers were combined, dried over anhydrous Na<sub>2</sub>SO<sub>4</sub>, and concentrated under reduced pressure. The residue was purified by silica gel column chromatography (ethyl acetate/petroleum ether = 1/5, v/v) to afford the desired product **S2**.

To a solution of **S2** (1 mmol, 1.0 equiv) in dry DMF (4 mL) was added Tosyl isocyanate (1.1 mmol, 1.1 equiv) slowly. And the reaction mixture was stirred at room temperature for 30min, water (10 mL) was added. The organic layer was extracted with ethyl acetate (4×10 mL). The organic layers were combined and washed with brine (3×30 mL), filtered, dried over anhydrous Na<sub>2</sub>SO<sub>4</sub>, and concentrated under reduced pressure. The residue was purified by silica gel column chromatography (ethyl acetate/petroleum ether = 1/3 to 1/1, v/v) to afford the desired product **3**.

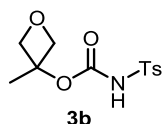

This compound was prepared according to the general procedure B as a white solid (228 mg, 80% yield in 1 mmol scale)

$R_f$  = 0.50, Petroleum ether/EtOAc = 1:1; <sup>1</sup>H NMR (500 MHz, Acetone) δ 7.90 (d,  $J$  = 8.4 Hz, 2H), 7.46 (d,  $J$  = 8.1 Hz, 2H), 4.54 (d,  $J$  = 7.2 Hz, 2H), 4.35 (d,  $J$  = 7.8 Hz, 2H), 2.45 (s, 3H), 1.58 (s, 3H).

<sup>13</sup>C NMR (126 MHz, Acetone) δ 150.22, 145.63, 137.68, 130.43, 128.81, 81.45, 79.42, 21.62, 21.52.

HRMS (ESI) exact mass calcd for C<sub>12</sub>H<sub>16</sub>NO<sub>5</sub>S [M+H]<sup>+</sup>: m/z 286.0744 [M+H]<sup>+</sup>, found: m/z 286.0744.

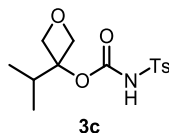

This compound was prepared according to the general procedure B as a white solid (257 mg, 72% yield in 1 mmol scale)

$R_f = 0.43$ , Petroleum ether/EtOAc = 1:1;  $^1\text{H}$  NMR (500 MHz, Acetone)  $\delta$  7.91 (d,  $J = 8.4$  Hz, 2H), 7.48 (d,  $J = 7.7$  Hz, 2H), 4.58-4.49 (m, 4H), 2.47 (s, 3H), 2.35-2.23 (m, 1H), 0.93 (d,  $J = 6.9$  Hz, 6H).

$^{13}\text{C}$  NMR (126 MHz, Acetone)  $\delta$  150.09, 145.60, 137.69, 130.43, 128.81, 85.41, 77.33, 31.26, 21.51, 16.39.

HRMS (ESI) exact mass calcd for  $\text{C}_{14}\text{H}_{20}\text{NO}_5\text{S}$   $[\text{M}+\text{H}]^+$ :  $m/z$  314.1057  $[\text{M}+\text{H}]^+$ , found:  $m/z$  314.1057.

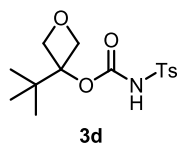

This compound was prepared according to the general procedure A as a white solid (245 mg, 76% yield in 1 mmol scale)

$R_f = 0.41$ , Petroleum ether/EtOAc = 1:1;  $^1\text{H}$  NMR (500 MHz,  $\text{CDCl}_3$ )  $\delta$  7.89 (d,  $J = 8.3$  Hz, 2H), 7.35 (d,  $J = 8.0$  Hz, 2H), 4.84-4.77 (m, 2H), 4.57-4.49 (m, 2H), 2.45 (s, 3H), 0.95 (s, 9H).

$^{13}\text{C}$  NMR (126 MHz,  $\text{CDCl}_3$ )  $\delta$  149.04, 145.32, 129.81, 128.35, 87.73, 76.34, 35.67, 24.24, 21.82.

HRMS (ESI) exact mass calcd for  $\text{C}_{15}\text{H}_{22}\text{NO}_5\text{S}$   $[\text{M}+\text{H}]^+$ :  $m/z$  328.1213  $[\text{M}+\text{H}]^+$ , found:  $m/z$  328.1213.

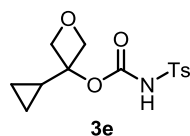

This compound was prepared according to the general procedure B as a white solid (261 mg, 84% yield in 1 mmol scale)

$R_f = 0.48$ , Petroleum ether/EtOAc = 1:1;  $^1\text{H}$  NMR (500 MHz, Acetone)  $\delta$  7.90 (d,  $J = 8.4$  Hz, 2H), 7.45 (d,  $J = 8.1$  Hz, 2H), 4.49 (d,  $J = 8.2$  Hz, 2H), 4.25 (d,  $J = 8.2$  Hz, 2H), 2.45 (s, 3H), 1.46-1.34 (m, 1H), 0.57-0.52 (m, 2H), 0.51-0.46 (m, 2H).

$^{13}\text{C}$  NMR (126 MHz, Acetone)  $\delta$  150.34, 145.58, 137.77, 130.42, 128.82, 83.09, 78.28, 21.52, 14.10, 2.03.

HRMS (ESI) exact mass calcd for  $\text{C}_{14}\text{H}_{18}\text{NO}_5\text{S}$   $[\text{M}+\text{H}]^+$ :  $m/z$  312.0904  $[\text{M}+\text{H}]^+$ , found:  $m/z$  312.0900.

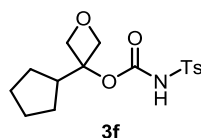

This compound was prepared according to the general procedure B as a white solid (282 mg, 83% yield in 1 mmol scale)

$R_f = 0.44$ , Petroleum ether/EtOAc = 1:1;  $^1\text{H}$  NMR (500 MHz, Acetone)  $\delta$  7.89 (d,  $J = 8.4$  Hz, 2H), 7.46 (d,  $J = 8.1$  Hz, 2H), 4.56 (d,  $J = 8.1$  Hz, 2H), 4.46 (d,  $J = 8.3$  Hz, 2H), 2.62-2.51 (m, 1H), 2.45 (s, 3H), 1.73-1.57 (m, 4H), 1.57-1.48 (m, 2H), 1.43-1.32 (m, 2H).

$^{13}\text{C}$  NMR (126 MHz, Acetone)  $\delta$  150.14, 145.58, 137.74, 130.42, 128.82, 84.77, 78.45, 42.68, 27.57, 26.38, 21.51.

HRMS (ESI) exact mass calcd for  $\text{C}_{16}\text{H}_{22}\text{NO}_5\text{S}$   $[\text{M}+\text{H}]^+$ :  $m/z$  340.1211  $[\text{M}+\text{H}]^+$ , found:  $m/z$  340.1213.

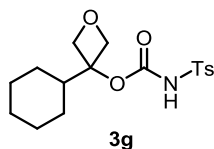

This compound was prepared according to the general procedure B as a white solid (314 mg, 89% yield in 1 mmol scale)

$R_f = 0.52$ , Petroleum ether/EtOAc = 1:1;  $^1\text{H}$  NMR (500 MHz, Acetone)  $\delta$  7.89 (d,  $J = 8.4$  Hz, 2H), 7.46 (d,  $J = 8.1$  Hz, 2H), 4.58-4.47 (m, 4H), 2.45 (s, 3H), 1.94-1.86 (m, 1H), 1.76-1.61 (m, 5H), 1.21-1.08 (m, 3H), 1.04-0.94 (m, 2H).

$^{13}\text{C}$  NMR (126 MHz, Acetone)  $\delta$  150.08, 145.58, 137.69, 130.43, 128.82, 84.96, 77.50, 41.47, 26.78, 26.72, 26.59, 21.52.

HRMS (ESI) exact mass calcd for  $\text{C}_{17}\text{H}_{24}\text{NO}_5\text{S}$   $[\text{M}+\text{H}]^+$ :  $m/z$  354.1368  $[\text{M}+\text{H}]^+$ , found:  $m/z$  354.1370.

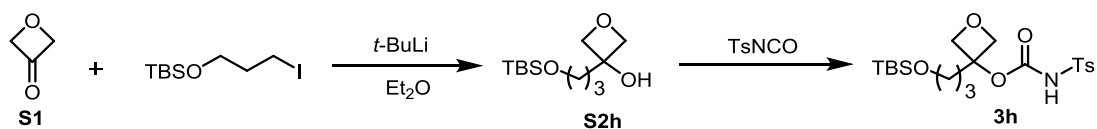

**General procedure to  $3h^3$ :** To a solution of *tert*-butyl(3-iodopropoxy)dimethylsilane

3. Pan J, Chen T, Zhang Z, Li Y. *Chem. Commun.* **2016**, 52, 2382-2385.

(4 mmol, 2.0 equiv) in dry Et<sub>2</sub>O (8 mL) was added *t*-BuLi (3.0 mL, 1.3 M in pentane, 4 mmol, 2.0 equiv) slowly at -78°C, after stirring at this temperature for 30 min, *Oxetan-3-one* (2 mmol, 1.0 equiv) in dry Et<sub>2</sub>O (5 mL) was added dropwise via syringe, and the reaction mixture was stirred at this temperature for 2 h. Saturated NH<sub>4</sub>Cl (aq) (10 mL) was added. The organic layer was extracted with ethyl acetate (3×10 mL). The organic layers were combined, dried over anhydrous Na<sub>2</sub>SO<sub>4</sub>, and concentrated under reduced pressure. The residue was purified by silica gel column chromatography (ethyl acetate/petroleum ether = 1/5, v/v) to afford the desired product **S2h**.

To a solution of **S2h** (1 mmol, 1.0 equiv) in dry DMF (4 mL) was added Tosyl isocyanate (1.1 mmol, 1.1 equiv) slowly. And the reaction mixture was stirred at room temperature for 30min, water (10 mL) was added. The organic layer was extracted with ethyl acetate (4×10 mL). The organic layers were combined and washed with brine (3×30 mL), filtered, dried over anhydrous Na<sub>2</sub>SO<sub>4</sub>, and concentrated under reduced pressure. The residue was purified by silica gel column chromatography (ethyl acetate/petroleum ether = 1/3 to 1/1, v/v) to afford the desired product **3h**.

white solid (290 mg, 65%);  $R_f = 0.46$ , Petroleum ether/EtOAc = 1:1; <sup>1</sup>H NMR (500 MHz, CDCl<sub>3</sub>) δ 7.89 (d, *J* = 8.4 Hz, 2H), 7.35 (d, *J* = 8.1 Hz, 2H), 4.64 (d, *J* = 7.6 Hz, 2H), 4.55-4.38 (m, 2H), 3.54 (t, *J* = 6.1 Hz, 2H), 2.45 (s, 3H), 2.16-2.04 (m, 2H), 1.45-1.34 (m, 2H), 0.87 (s, 9H), 0.02 (s, 6H).

<sup>13</sup>C NMR (126 MHz, CDCl<sub>3</sub>) δ 148.55, 145.42, 135.56, 129.86, 128.41, 82.33, 80.11, 62.35, 30.60, 26.46, 26.05, 21.85, 18.42, -5.20.

HRMS (ESI) exact mass calcd for C<sub>20</sub>H<sub>34</sub>NO<sub>6</sub>SSi [M+H]<sup>+</sup>: *m/z* 444.1871 [M+H]<sup>+</sup>, found: *m/z* 444.1871.

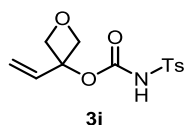



This compound was prepared according to the general procedure B as a white solid (273 mg, 92% yield in 1 mmol scale)

$R_f = 0.50$ , Petroleum ether/EtOAc = 1:1;  $^1\text{H}$  NMR (500 MHz,  $\text{CDCl}_3$ )  $\delta$  7.90 (d,  $J = 8.5$  Hz, 2H), 7.35 (d,  $J = 8.1$  Hz, 2H), 6.18-6.06 (m, 1H), 5.34-5.18 (m, 2H), 4.78-4.71 (m, 2H), 4.68-4.59 (m, 2H), 2.46 (s, 3H).

$^{13}\text{C}$  NMR (126 MHz,  $\text{CDCl}_3$ )  $\delta$  148.34, 145.27, 135.17, 134.22, 129.62, 128.17, 116.50, 80.51, 80.02, 21.60.

HRMS (ESI) exact mass calcd for  $\text{C}_{13}\text{H}_{16}\text{NO}_5\text{S}$   $[\text{M}+\text{H}]^+$ :  $m/z$  298.0744  $[\text{M}+\text{H}]^+$ , found:  $m/z$  298.0744.

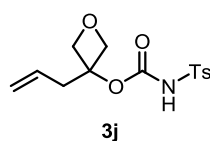

This compound was prepared according to the general procedure B as a white solid (236 mg, 76% yield in 1 mmol scale)

$R_f = 0.49$ , Petroleum ether/EtOAc = 1:1;  $^1\text{H}$  NMR (500 MHz, Acetone)  $\delta$  7.89 (d,  $J = 8.4$  Hz, 2H), 7.46 (d,  $J = 8.0$  Hz, 2H), 5.71-5.57 (m, 1H), 5.06-4.94 (m, 2H), 4.54 (d,  $J = 7.8$  Hz, 2H), 4.43 (d,  $J = 8.1$  Hz, 2H), 2.76-2.70 (m, 2H), 2.46 (s, 3H).

$^{13}\text{C}$  NMR (126 MHz, Acetone)  $\delta$  150.02, 145.63, 137.59, 131.96, 130.42, 128.85, 119.63, 80.80, 79.68, 39.10, 21.51.

HRMS (ESI) exact mass calcd for  $\text{C}_{14}\text{H}_{18}\text{NO}_5\text{S}$   $[\text{M}+\text{H}]^+$ :  $m/z$  312.0903  $[\text{M}+\text{H}]^+$ , found:  $m/z$  312.0900.

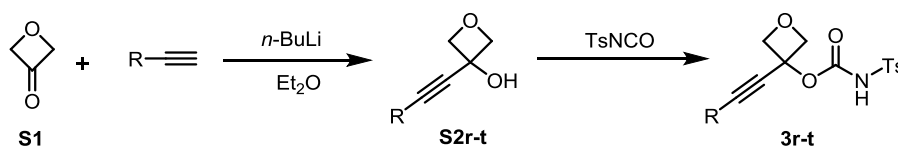

**General procedure C<sup>4</sup>:** To a solution of corresponding *alkyne* (12 mmol, 1.2 equiv) in dry THF (10 mL) was added *n*-BuLi (12mmol, 1.2 equiv) slowly at  $-78^\circ\text{C}$ , after stirring at this temperature for 1 h, *Oxetan-3-one* (10 mmol, 1.0 equiv) in dry THF (10 mL) was added dropwise via syringe, and the reaction mixture was stirred at this temperature for 2 h. Saturated  $\text{NH}_4\text{Cl}$  (aq) (10 mL) was added. The organic layer was

4. Wang Z, Chen Z, Sun J. *Angew. Chem., Int. Ed.* **2013**, 52, 6685-6688.

extracted with ethyl acetate (3×10 mL). The organic layers were combined, dried over anhydrous Na<sub>2</sub>SO<sub>4</sub>, and concentrated under reduced pressure. The residue was purified by silica gel column chromatography (ethyl acetate/petroleum ether = 1/5, v/v) to afford the desired product **S2**.

To a solution of **S2** (1 mmol, 1.0 equiv) in dry DMF (4 mL) was added Tosyl isocyanate (1.1 mmol, 1.1 equiv) slowly. And the reaction mixture was stirred at room temperature for 30min, water (10 mL) was added. The organic layer was extracted with ethyl acetate (4×10 mL). The organic layers were combined and washed with brine (3×30 mL), filtered, dried over anhydrous Na<sub>2</sub>SO<sub>4</sub>, and concentrated under reduced pressure. The residue was purified by silica gel column chromatography (ethyl acetate/petroleum ether = 1/3 to 1/1, v/v) to afford the desired product **3**.

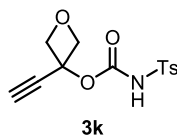

This compound was prepared according to the general procedure C as a white solid (224 mg, 76% yield in 1 mmol scale)

$R_f$  = 0.52, Petroleum ether/EtOAc = 1:1; <sup>1</sup>H NMR (500 MHz, Acetone) δ 7.91 (d,  $J$  = 8.4 Hz, 2H), 7.46 (d,  $J$  = 8.1 Hz, 2H), 4.74-4.69 (m, 2H), 4.67-4.62 (m, 2H), 3.40 (s, 1H), 2.45 (s, 3H).

<sup>13</sup>C NMR (126 MHz, Acetone) δ 149.65, 145.82, 137.39, 130.50, 128.83, 81.31, 80.20, 78.02, 72.05, 21.53.

HRMS (ESI) exact mass calcd for C<sub>13</sub>H<sub>14</sub>NO<sub>5</sub>S [M+H]<sup>+</sup>: m/z 296.0587 [M+H]<sup>+</sup>, found: m/z 296.0587.

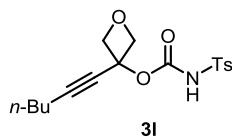

This compound was prepared according to the general procedure C as a white solid (299 mg, 85% yield in 1 mmol scale)

$R_f = 0.54$ , Petroleum ether/EtOAc = 1:1;  $^1\text{H}$  NMR (500 MHz, Acetone)  $\delta$  7.91 (d,  $J = 8.4$  Hz, 2H), 7.46 (d,  $J = 8.0$  Hz, 2H), 4.73-4.57 (m, 4H), 2.45 (s, 3H), 2.19 (t,  $J = 6.9$  Hz, 2H), 1.40-1.31 (m, 4H), 0.86 (t,  $J = 7.2$  Hz, 3H).

$^{13}\text{C}$  NMR (126 MHz, Acetone)  $\delta$  148.85, 144.79, 136.65, 129.56, 127.97, 88.54, 81.00, 76.18, 71.92, 30.06, 21.46, 20.67, 17.69, 12.90.

HRMS (ESI) exact mass calcd for  $\text{C}_{17}\text{H}_{22}\text{NO}_5\text{S}$   $[\text{M}+\text{H}]^+$ :  $m/z$  352.1214  $[\text{M}+\text{H}]^+$ , found:  $m/z$  352.1213.

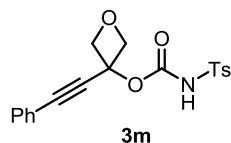

This compound was prepared according to the general procedure C as a white solid (297 mg, 80% yield in 1 mmol scale)

$R_f = 0.55$ , Petroleum ether/EtOAc = 1:1;  $^1\text{H}$  NMR (500 MHz,  $\text{CDCl}_3$ )  $\delta$  7.93 (d,  $J = 8.1$  Hz, 2H), 7.43-7.19 (m, 7H), 4.91 (d,  $J = 7.7$  Hz, 2H), 4.80 (d,  $J = 7.6$  Hz, 2H), 2.41 (s, 3H).

$^{13}\text{C}$  NMR (126 MHz,  $\text{CDCl}_3$ )  $\delta$  148.68, 145.74, 135.73, 132.29, 130.11, 129.59, 128.74, 128.67, 121.66, 88.69, 83.95, 81.75, 73.30, 22.06.

HRMS (ESI) exact mass calcd for  $\text{C}_{19}\text{H}_{18}\text{NO}_5\text{S}$   $[\text{M}+\text{H}]^+$ :  $m/z$  372.0903  $[\text{M}+\text{H}]^+$ , found:  $m/z$  372.0900.

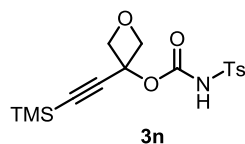

This compound was prepared according to the general procedure C as a white solid (320 mg, 87% yield in 1 mmol scale)

$R_f = 0.55$ , Petroleum ether/EtOAc = 1:1;  $^1\text{H}$  NMR (500 MHz, Acetone)  $\delta$  7.91 (d,  $J = 8.3$  Hz, 2H), 7.46 (d,  $J = 8.1$  Hz, 2H), 4.73-4.64 (m, 4H), 2.45 (s, 3H), 0.09 (s, 9H).

$^{13}\text{C}$  NMR (126 MHz, Acetone)  $\delta$  149.63, 145.73, 137.48, 130.46, 128.87, 101.43, 93.29, 81.47, 72.46, 21.56, -0.44.

HRMS (ESI) exact mass calcd for  $\text{C}_{16}\text{H}_{22}\text{NO}_5\text{SSi}$   $[\text{M}+\text{H}]^+$ :  $m/z$  368.0983  $[\text{M}+\text{H}]^+$ , found:  $m/z$  368.0982.

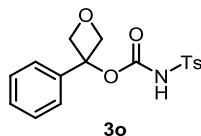

This compound was prepared according to the general procedure B as a white solid (323 mg, 93% yield in 1 mmol scale)

$R_f$  = 0.43, Petroleum ether/EtOAc = 1:1;  $^1\text{H}$  NMR (500 MHz,  $\text{CDCl}_3$ )  $\delta$  7.88 (d,  $J$  = 8.4 Hz, 2H), 7.35-7.27 (m, 7H),  $\delta$  4.95 (d,  $J$  = 8.3 Hz, 2H), 4.87 (d,  $J$  = 8.3 Hz, 2H), 2.45 (s, 3H).

$^{13}\text{C}$  NMR (126 MHz,  $\text{CDCl}_3$ )  $\delta$  148.67, 145.43, 138.21, 135.60, 129.86, 128.86, 128.57, 128.39, 124.68, 82.09, 81.62, 21.82.

HRMS (ESI) exact mass calcd for  $\text{C}_{17}\text{H}_{18}\text{NO}_5\text{S}$   $[\text{M}+\text{H}]^+$ :  $m/z$  348.0901  $[\text{M}+\text{H}]^+$ , found:  $m/z$  348.0901.

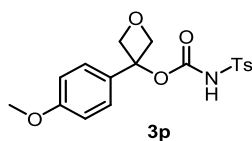

This compound was prepared according to the general procedure B as a white solid (306 mg, 81% yield in 1 mmol scale)

$R_f$  = 0.45, Petroleum ether/EtOAc = 1:1;  $^1\text{H}$  NMR (500 MHz, Acetone)  $\delta$  7.88 (d,  $J$  = 8.4 Hz, 2H), 7.44 (d,  $J$  = 8.1 Hz, 2H), 7.30-7.22 (m, 2H), 6.91-6.84 (m, 2H), 4.88-4.85 (m, 2H), 4.80-4.76 (m, 2H), 3.79 (s, 3H), 2.45 (s, 3H).

$^{13}\text{C}$  NMR (126 MHz, Acetone)  $\delta$  160.46, 149.94, 145.65, 137.61, 131.84, 130.46, 128.82, 127.23, 114.63, 81.98, 81.71, 55.58, 21.52.

HRMS (ESI) exact mass calcd for  $\text{C}_{18}\text{H}_{20}\text{NO}_6\text{S}$   $[\text{M}+\text{H}]^+$ :  $m/z$  378.1009  $[\text{M}+\text{H}]^+$ , found:  $m/z$  378.1006.

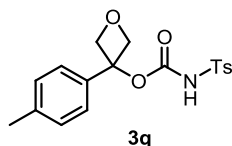

This compound was prepared according to the general procedure B as a white solid (307 mg, 85% yield in 1 mmol scale)

$R_f = 0.43$ , Petroleum ether/EtOAc = 1:1;  $^1\text{H}$  NMR (500 MHz, DMSO- $d_6$ )  $\delta$  7.77 (d,  $J = 7.9$  Hz, 2H), 7.42 (d,  $J = 8.0$  Hz, 2H), 7.19-7.07 (m, 4H), 4.79 (d,  $J = 7.6$  Hz, 2H), 4.74 (d,  $J = 7.7$  Hz, 2H), 2.40 (s, 3H), 2.28 (s, 3H).

$^{13}\text{C}$  NMR (126 MHz, DMSO)  $\delta$  149.26, 144.30, 137.42, 136.26, 135.84, 129.64, 129.02, 127.37, 124.35, 80.51, 80.46, 21.03, 20.55.

HRMS (ESI) exact mass calcd for  $\text{C}_{18}\text{H}_{20}\text{NO}_5\text{S}$   $[\text{M}+\text{H}]^+$ :  $m/z$  362.1059  $[\text{M}+\text{H}]^+$ , found:  $m/z$  362.1057.

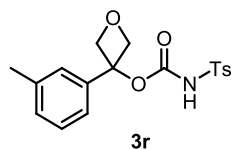

This compound was prepared according to the general procedure B as a white solid (278 mg, 77% yield in 1 mmol scale)

$R_f = 0.43$ , Petroleum ether/EtOAc = 1:1;  $^1\text{H}$  NMR (500 MHz, Acetone)  $\delta$  7.89 (d,  $J = 8.3$  Hz, 2H), 7.44 (d,  $J = 8.1$  Hz, 2H), 7.25-7.18 (m, 1H), 7.15-7.10 (m, 3H), 4.94-4.84 (m, 2H), 4.82-4.72 (m, 2H), 2.45 (s, 3H), 2.27 (s, 3H).

$^{13}\text{C}$  NMR (126 MHz, Acetone)  $\delta$  149.91, 145.68, 140.03, 138.99, 137.59, 130.48, 129.60, 129.34, 128.85, 125.84, 122.41, 81.97, 81.86, 21.53, 21.44.

HRMS (ESI) exact mass calcd for  $\text{C}_{18}\text{H}_{20}\text{NO}_5\text{S}$   $[\text{M}+\text{H}]^+$ :  $m/z$  362.1057  $[\text{M}+\text{H}]^+$ , found:  $m/z$  362.1057.

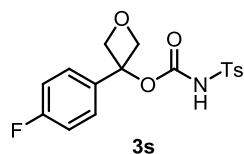

This compound was prepared according to the general procedure B as a white solid (259 mg, 71% yield in 1 mmol scale)

$R_f = 0.46$ , Petroleum ether/EtOAc = 1:1;  $^1\text{H}$  NMR (500 MHz, Acetone)  $\delta$  7.88 (d,  $J = 8.4$  Hz, 2H), 7.45 (d,  $J = 8.1$  Hz, 2H), 7.42-7.36 (m, 2H), 7.14-7.08 (m, 2H), 4.88 (d,  $J = 8.4$  Hz, 2H), 4.79 (d,  $J = 8.3$  Hz, 2H), 2.46 (s, 3H).

$^{13}\text{C}$  NMR (126 MHz, Acetone)  $\delta$  163.23 (d,  $J = 245.6$  Hz), 149.95, 145.77, 137.53, 136.22 (d,  $J = 3.2$  Hz), 130.49, 128.84, 127.92 (d,  $J = 8.3$  Hz), 116.12 (d,  $J = 21.8$  Hz), 81.61, 81.57, 21.51.

HRMS (ESI) exact mass calcd for  $C_{17}H_{17}FNO_5S$   $[M+H]^+$ :  $m/z$  366.0806  $[M+H]^+$ ,  
found:  $m/z$  366.0806.

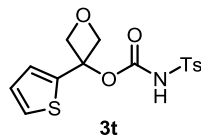

This compound was prepared according to the general procedure B as a white solid  
(307 mg, 87% yield in 1 mmol scale)

$R_f$  = 0.51, Petroleum ether/EtOAc = 1:1;  $^1H$  NMR (500 MHz, Acetone)  $\delta$  7.87 (d,  $J$  = 8.4 Hz, 2H), 7.46-7.40 (m, 3H), 7.15-7.12 (m, 1H), 7.00-6.96 (m, 1H), 4.91 (d,  $J$  = 8.3 Hz, 2H), 4.80 (d,  $J$  = 8.3 Hz, 2H), 2.44 (s, 3H).

$^{13}C$  NMR (126 MHz, Acetone)  $\delta$  149.92, 145.71, 143.28, 137.53, 130.46, 128.83, 127.78, 126.97, 126.29, 82.16, 79.72, 21.53.

HRMS (ESI) exact mass calcd for  $C_{15}H_{16}NO_5S_2$   $[M+H]^+$ :  $m/z$  354.0465  $[M+H]^+$ ,  
found:  $m/z$  354.0464.

#### 4. General procedure for the ring opening of oxetane

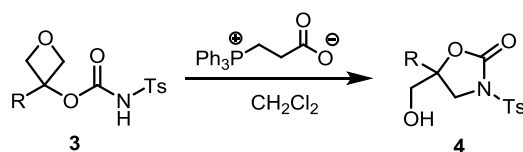

**General procedure D:** To a solution of corresponding *oxetone* (0.1 mmol, 1.0 equiv) in dry  $\text{CH}_2\text{Cl}_2$  (1 mL) was added catalyst **C1** (0.01 mmol, 0.1 equiv) at room temperature. The reaction mixture was stirred until all starting material was consumed as judged by TLC. The solvent was removed under vacuum. The residue was purified by flash column chromatography (ethyl acetate/petroleum ether = 1/3 to 1/1, v/v) to afford the product.

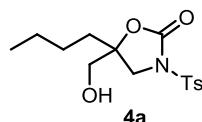

This compound was prepared according to the general procedure D as a white solid (31.7 mg, 97% yield in 0.1 mmol scale).

$R_f$  = 0.49, Petroleum ether/EtOAc = 1:1;  $^1\text{H}$  NMR (500 MHz, Acetone)  $\delta$  7.93 (d,  $J$  = 8.4 Hz, 2H), 7.47 (d,  $J$  = 8.0 Hz, 2H), 4.47 (t,  $J$  = 5.9 Hz, 1H), 4.13 (d,  $J$  = 9.2 Hz, 1H), 3.85 (d,  $J$  = 9.2 Hz, 1H), 3.65 (dd,  $J$  = 12.1, 5.4 Hz, 1H), 3.56 (dd,  $J$  = 12.1, 6.3 Hz, 1H), 2.46 (s, 3H), 1.74-1.61 (m, 2H), 1.36-1.17 (m, 4H), 0.85 (t,  $J$  = 7.1 Hz, 3H).  $^{13}\text{C}$  NMR (126 MHz, Acetone)  $\delta$  152.14, 146.29, 135.92, 130.57, 128.91, 83.96, 65.77, 50.28, 35.62, 25.12, 23.44, 21.55, 14.11.

HRMS (ESI) exact mass calcd for  $\text{C}_{15}\text{H}_{22}\text{NO}_5\text{S}$   $[\text{M}+\text{H}]^+$ :  $m/z$  328.1214  $[\text{M}+\text{H}]^+$ , found:  $m/z$  328.1213.

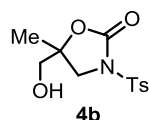

This compound was prepared according to the general procedure D as a white solid (26 mg, 91% yield in 0.1 mmol scale).

$R_f$  = 0.50, Petroleum ether/EtOAc = 1:1;  $^1\text{H}$  NMR (500 MHz, Acetone)  $\delta$  7.93 (d,  $J$  = 8.4 Hz, 2H), 7.47 (d,  $J$  = 8.0 Hz, 2H), 4.47 (t,  $J$  = 5.9 Hz, 1H), 4.13 (d,  $J$  = 9.2 Hz,

1H), 3.85 (d,  $J = 9.2$  Hz, 1H), 3.65 (dd,  $J = 12.1, 5.4$  Hz, 1H), 3.56 (dd,  $J = 12.1, 6.3$  Hz, 1H), 2.46 (s, 3H), 1.74-1.61 (m, 2H), 1.36-1.17 (m, 4H), 0.85 (t,  $J = 7.1$  Hz, 3H).  
 $^{13}\text{C}$  NMR (126 MHz, Acetone)  $\delta$  206.31, 206.16, 206.00, 152.14, 146.29, 135.92, 130.57, 128.91, 83.96, 65.77, 50.28, 35.62, 25.12, 23.44, 21.55, 14.11.

HRMS (ESI) exact mass calcd for  $\text{C}_{12}\text{H}_{16}\text{NO}_5\text{S}$   $[\text{M}+\text{H}]^+$ :  $m/z$  286.0744  $[\text{M}+\text{H}]^+$ , found:  $m/z$  286.0744.

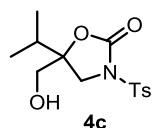

This compound was prepared according to the general procedure D as a white solid (26 mg, 84% yield in 0.1 mmol scale).

$R_f = 0.47$ , Petroleum ether/EtOAc = 1:1;  $^1\text{H}$  NMR (500 MHz, Acetone)  $\delta$  7.93 (d,  $J = 8.4$  Hz, 2H), 7.46 (d,  $J = 8.2$  Hz, 2H), 4.45-4.36 (m, 1H), 4.06 (d,  $J = 9.3$  Hz, 1H), 3.89 (d,  $J = 9.3$  Hz, 1H), 3.77-3.69 (m, 1H), 3.67-3.58 (m, 1H), 2.45 (s, 3H), 2.09-1.98 (m, 1H), 0.91 (d,  $J = 6.9$  Hz, 3H), 0.88 (d,  $J = 6.9$  Hz, 3H).

$^{13}\text{C}$  NMR (126 MHz, Acetone)  $\delta$  152.19, 146.25, 136.03, 130.53, 128.92, 64.55, 48.27, 33.53, 21.55, 16.39, 16.11.

HRMS (ESI) exact mass calcd for  $\text{C}_{14}\text{H}_{20}\text{NO}_5\text{S}$   $[\text{M}+\text{H}]^+$ :  $m/z$  314.1057  $[\text{M}+\text{H}]^+$ , found:  $m/z$  314.1057.

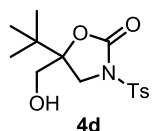

This compound was prepared according to the general procedure D as a white solid (27 mg, 82% yield in 0.1 mmol scale).

$R_f = 0.48$ , Petroleum ether/EtOAc = 1:1;  $^1\text{H}$  NMR (500 MHz,  $\text{CDCl}_3$ )  $\delta$  7.92 (d,  $J = 8.5$  Hz, 2H), 7.33 (d,  $J = 8.1$  Hz, 2H), 4.05 (d,  $J = 9.2$  Hz, 1H), 3.94 (d,  $J = 9.3$  Hz, 1H), 3.92-3.86 (m, 1H), 3.55-3.47 (m, 1H), 2.43 (s, 3H), 0.93 (s, 9H).

$^{13}\text{C}$  NMR (126 MHz,  $\text{CDCl}_3$ )  $\delta$  152.10, 145.62, 134.60, 129.87, 128.28, 87.41, 63.02, 46.79, 36.26, 24.44, 21.86.

HRMS (ESI) exact mass calcd for  $\text{C}_{15}\text{H}_{22}\text{NO}_5\text{S}$   $[\text{M}+\text{H}]^+$ :  $m/z$  328.1216  $[\text{M}+\text{H}]^+$ , found:  $m/z$  328.1213.



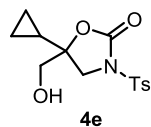

This compound was prepared according to the general procedure D as a white solid (25 mg, 81% yield in 0.1 mmol scale).

$R_f$  = 0.51, Petroleum ether/EtOAc = 1:1;  $^1\text{H}$  NMR (500 MHz, Acetone)  $\delta$  7.91 (d,  $J$  = 8.5 Hz, 2H), 7.47 (d,  $J$  = 8.1 Hz, 2H), 4.61-4.42 (m, 1H), 4.18 (d,  $J$  = 9.2 Hz, 1H), 3.75 (d,  $J$  = 9.2 Hz, 1H), 3.73-3.70 (m, 1H), 3.66-3.60 (m, 1H), 2.46 (s, 3H), 1.21-1.14 (m, 1H), 0.52-0.45 (m, 2H), 0.45-0.37 (m, 1H), 0.30-0.19 (m, 1H).

$^{13}\text{C}$  NMR (126 MHz, Acetone)  $\delta$  152.17, 146.46, 135.96, 130.70, 129.00, 83.04, 66.28, 50.29, 21.67, 15.96, 0.69, -0.18.

HRMS (ESI) exact mass calcd for  $\text{C}_{14}\text{H}_{18}\text{NO}_5\text{S}$   $[\text{M}+\text{H}]^+$ :  $m/z$  312.0900  $[\text{M}+\text{H}]^+$ , found:  $m/z$  312.0900.

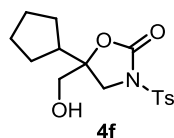

This compound was prepared according to the general procedure D as a white solid (25 mg, 74% yield in 0.1 mmol scale).

$R_f$  = 0.48, Petroleum ether/EtOAc = 1:1;  $^1\text{H}$  NMR (500 MHz, Acetone)  $\delta$  7.92 (d,  $J$  = 8.4 Hz, 2H), 7.46 (d,  $J$  = 8.1 Hz, 2H), 4.55-4.39 (m, 1H), 4.13 (d,  $J$  = 9.2 Hz, 1H), 3.83 (d,  $J$  = 9.2 Hz, 1H), 3.76-3.65 (m, 1H), 3.63-3.50 (m, 1H), 2.45 (s, 3H), 2.32-2.18 (m, 1H), 1.77-1.63 (m, 2H), 1.63-1.46 (m, 4H), 1.34-1.11 (m, 2H).

$^{13}\text{C}$  NMR (126 MHz, Acetone)  $\delta$  152.41, 146.43, 136.13, 130.69, 129.04, 85.82, 66.01, 49.15, 45.08, 27.00, 26.93, 26.22, 26.13, 21.69.

HRMS (ESI) exact mass calcd for  $\text{C}_{16}\text{H}_{22}\text{NO}_5\text{S}$   $[\text{M}+\text{H}]^+$ :  $m/z$  340.1213  $[\text{M}+\text{H}]^+$ , found:  $m/z$  340.1213.

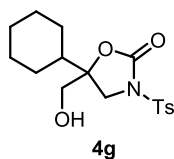

This compound was prepared according to the general procedure D as a white solid

(31 mg, 88% yield in 0.1 mmol scale).

$R_f$  = 0.49, Petroleum ether/EtOAc = 1:1;  $^1\text{H}$  NMR (500 MHz, Acetone)  $\delta$  7.92 (d,  $J$  = 8.5 Hz, 2H), 7.45 (d,  $J$  = 8.1 Hz, 2H), 4.44-4.28 (m, 1H), 4.04 (d,  $J$  = 9.3 Hz, 1H), 3.92 (d,  $J$  = 9.2 Hz, 1H), 3.75-3.67 (m, 1H), 3.66-3.59 (m, 1H), 2.45 (s, 3H), 1.76-1.70 (m, 3H), 1.68-1.61 (m, 3H), 1.27-1.12 (m, 3H), 1.09-0.95 (m, 2H).

$^{13}\text{C}$  NMR (126 MHz, Acetone)  $\delta$  152.34, 146.39, 136.19, 130.67, 129.09, 86.00, 64.58, 48.84, 43.88, 26.93, 26.84, 26.82, 26.78, 26.54, 21.70.

HRMS (ESI) exact mass calcd for  $\text{C}_{17}\text{H}_{24}\text{NO}_5\text{S}$   $[\text{M}+\text{H}]^+$ :  $m/z$  354.1372  $[\text{M}+\text{H}]^+$ , found:  $m/z$  354.1370.

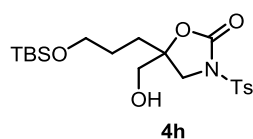

This compound was prepared according to the general procedure D as a white solid (39 mg, 87% yield in 0.1 mmol scale).

$R_f$  = 0.49, Petroleum ether/EtOAc = 1:1;  $^1\text{H}$  NMR (500 MHz, Acetone)  $\delta$  7.92 (d,  $J$  = 8.4 Hz, 2H), 7.46 (d,  $J$  = 7.7 Hz, 2H), 4.54-4.46 (m, 1H), 4.15 (d,  $J$  = 9.2 Hz, 1H), 3.86 (d,  $J$  = 9.2 Hz, 1H), 3.72-3.50 (m, 4H), 2.45 (s, 3H), 1.85-1.73 (m, 2H), 1.57-1.39 (m, 2H), 0.88 (s, 9H), 0.04 (s, 6H).

$^{13}\text{C}$  NMR (126 MHz, Acetone)  $\delta$  152.06, 146.25, 135.88, 130.55, 128.90, 83.87, 65.74, 63.19, 50.43, 32.42, 26.56, 26.26, 21.57, 18.76, -5.21.

HRMS (ESI) exact mass calcd for  $\text{C}_{20}\text{H}_{34}\text{NO}_6\text{SSi}$   $[\text{M}+\text{H}]^+$ :  $m/z$  444.1875  $[\text{M}+\text{H}]^+$ , found:  $m/z$  444.1871.

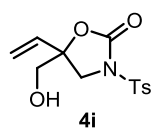

This compound was prepared according to the general procedure D as a white solid (22 mg, 73% yield in 0.1 mmol scale).

$R_f$  = 0.56, Petroleum ether/EtOAc = 1:1;  $^1\text{H}$  NMR (500 MHz, Acetone)  $\delta$  7.91 (d,  $J$  = 8.4 Hz, 2H), 7.47 (d,  $J$  = 8.0 Hz, 2H), 6.09-5.94 (m, 1H), 5.45-5.27 (m, 2H), 4.67-4.55 (m, 1H), 4.28 (d,  $J$  = 9.1 Hz, 1H), 3.95 (d,  $J$  = 9.1 Hz, 1H), 3.73-3.58 (m, 2H), 2.46 (s, 3H).

$^{13}\text{C}$  NMR (126 MHz, Acetone)  $\delta$  151.84, 146.43, 136.37, 135.77, 130.62, 129.01, 117.31, 83.35, 65.54, 50.99, 21.57.

HRMS (ESI) exact mass calcd for  $\text{C}_{13}\text{H}_{16}\text{NO}_5\text{S}$   $[\text{M}+\text{H}]^+$ :  $m/z$  298.0744  $[\text{M}+\text{H}]^+$ , found:  $m/z$  298.0744.

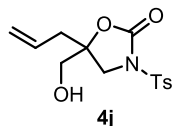

This compound was prepared according to the general procedure D as a white solid (27 mg, 87% yield in 0.1 mmol scale).

$R_f$  = 0.49, Petroleum ether/EtOAc = 1:1;  $^1\text{H}$  NMR (500 MHz, Acetone)  $\delta$  7.90 (d,  $J$  = 8.4 Hz, 2H), 7.46 (d,  $J$  = 8.1 Hz, 2H), 5.74-5.61 (m, 1H), 5.24-5.17 (m, 1H), 5.12-5.05 (m, 1H), 4.55-4.48 (m, 1H), 4.10 (d,  $J$  = 9.2 Hz, 1H), 3.89 (d,  $J$  = 9.2 Hz, 1H), 3.67 (dd,  $J$  = 12.1, 5.5 Hz, 1H), 3.58 (dd,  $J$  = 12.1, 6.4 Hz, 1H), 2.53-2.39 (m, 5H).

$^{13}\text{C}$  NMR (126 MHz, Acetone)  $\delta$  152.10, 146.41, 136.05, 131.32, 130.65, 129.06, 121.19, 83.20, 65.95, 49.81, 40.06, 21.66.

HRMS (ESI) exact mass calcd for  $\text{C}_{14}\text{H}_{18}\text{NO}_5\text{S}$   $[\text{M}+\text{H}]^+$ :  $m/z$  312.0900  $[\text{M}+\text{H}]^+$ , found:  $m/z$  312.0900.

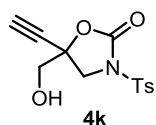

This compound was prepared according to the general procedure D as a white solid (22 mg, 75% yield in 0.1 mmol scale).

$R_f$  = 0.49, Petroleum ether/EtOAc = 1:1;  $^1\text{H}$  NMR (500 MHz, Acetone)  $\delta$  7.94 (d,  $J$  = 8.4 Hz, 2H), 7.48 (d,  $J$  = 8.0 Hz, 2H), 4.97-4.84 (m, 1H), 4.39 (d,  $J$  = 9.2 Hz, 1H), 4.16 (d,  $J$  = 9.3 Hz, 1H), 3.91-3.83 (m, 1H), 3.79-3.70 (m, 1H), 3.48 (s, 1H), 2.46 (s, 3H).

$^{13}\text{C}$  NMR (126 MHz, Acetone)  $\delta$  151.21, 146.70, 135.47, 130.70, 129.08, 79.95, 79.05, 76.35, 66.18, 52.19, 21.58.

HRMS (ESI) exact mass calcd for  $\text{C}_{13}\text{H}_{14}\text{NO}_5\text{S}$   $[\text{M}+\text{H}]^+$ :  $m/z$  296.0589  $[\text{M}+\text{H}]^+$ , found:  $m/z$  296.0587.

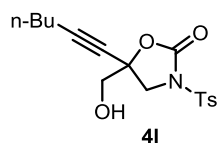

This compound was prepared according to the general procedure D as a white solid (32 mg, 91% yield in 0.1 mmol scale).

$R_f$  = 0.49, Petroleum ether/EtOAc = 1:1;  $^1\text{H}$  NMR (500 MHz,  $\text{CDCl}_3$ )  $\delta$  7.92 (d,  $J$  = 8.4 Hz, 2H), 7.35 (d,  $J$  = 7.9 Hz, 2H), 4.25 (d,  $J$  = 9.0 Hz, 1H), 4.05 (d,  $J$  = 9.1 Hz, 1H), 3.83 (d,  $J$  = 12.6 Hz, 1H), 3.57 (d,  $J$  = 12.6 Hz, 1H), 2.45 (s, 3H), 2.22 (t,  $J$  = 7.1 Hz, 2H), 1.52-1.44 (m, 2H), 1.42-1.32 (m, 2H), 0.91 (t,  $J$  = 7.3 Hz, 3H).

$^{13}\text{C}$  NMR (126 MHz,  $\text{CDCl}_3$ )  $\delta$  150.35, 145.12, 133.46, 129.23, 127.64, 90.78, 75.32, 74.26, 65.53, 51.20, 29.39, 21.26, 21.11, 17.69, 12.88.

HRMS (ESI) exact mass calcd for  $\text{C}_{17}\text{H}_{22}\text{NO}_5\text{S}$   $[\text{M}+\text{H}]^+$ :  $m/z$  352.1213  $[\text{M}+\text{H}]^+$ , found:  $m/z$  352.1213.

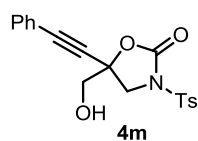

This compound was prepared according to the general procedure D as a white solid (25 mg, 68% yield in 0.1 mmol scale).

$R_f$  = 0.47, Petroleum ether/EtOAc = 1:1;  $^1\text{H}$  NMR (500 MHz, Acetone)  $\delta$  7.96 (d,  $J$  = 8.3 Hz, 2H), 7.52-7.39 (m, 7H), 5.02-4.93 (m, 1H), 4.47 (d,  $J$  = 9.3 Hz, 1H), 4.29 (d,  $J$  = 9.3 Hz, 1H), 4.01-3.92 (m, 1H), 3.88-3.81 (m, 1H), 2.45 (s, 3H).

$^{13}\text{C}$  NMR (126 MHz, Acetone)  $\delta$  151.38, 146.66, 135.57, 132.77, 130.70, 130.51, 129.51, 129.08, 121.82, 88.94, 85.01, 77.18, 66.30, 52.44, 21.58.

HRMS (ESI) exact mass calcd for  $\text{C}_{19}\text{H}_{18}\text{NO}_5\text{S}$   $[\text{M}+\text{H}]^+$ :  $m/z$  372.0901  $[\text{M}+\text{H}]^+$ , found:  $m/z$  372.0900.

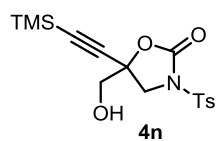

This compound was prepared according to the general procedure D as a white solid (27 mg, 73% yield in 0.1 mmol scale).

$R_f$  = 0.47, Petroleum ether/EtOAc = 1:1;  $^1\text{H}$  NMR (500 MHz, Acetone)  $\delta$  7.93 (d,  $J$  = 8.4 Hz, 2H), 7.48 (d,  $J$  = 7.8 Hz, 2H), 4.96-4.79 (m, 1H), 4.38 (d,  $J$  = 9.2 Hz, 1H), 4.13 (d,  $J$  = 9.2 Hz, 1H), 3.93-3.78 (m, 1H), 3.78-3.64 (m, 1H), 2.46 (s, 3H), 0.17 (s, 9H).

$^{13}\text{C}$  NMR (126 MHz, Acetone)  $\delta$  151.27, 146.65, 135.56, 130.69, 129.05, 100.96, 94.76, 76.67, 66.23, 52.31, 21.58, -0.49.

HRMS (ESI) exact mass calcd for  $\text{C}_{16}\text{H}_{22}\text{NO}_5\text{SSi}$   $[\text{M}+\text{H}]^+$ :  $m/z$  368.0982  $[\text{M}+\text{H}]^+$ , found:  $m/z$  368.0982.

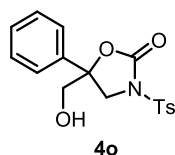

This compound was prepared according to the general procedure D as a white solid (30 mg, 88% yield in 0.1 mmol scale).

$R_f$  = 0.53, Petroleum ether/EtOAc = 1:1;  $^1\text{H}$  NMR (500 MHz, Acetone)  $\delta$  7.90 (d,  $J$  = 8.5 Hz, 2H), 7.46-7.35 (m, 7H), 4.79-4.75 (m, 1H), 4.66 (d,  $J$  = 9.2 Hz, 1H), 4.19 (d,  $J$  = 9.2 Hz, 1H), 3.84-3.74 (m, 2H), 2.43 (s, 3H).

$^{13}\text{C}$  NMR (126 MHz, Acetone)  $\delta$  151.77, 146.41, 140.25, 135.66, 130.58, 129.57, 129.36, 128.95, 125.54, 84.71, 68.03, 52.87, 21.55.

HRMS (ESI) exact mass calcd for  $\text{C}_{17}\text{H}_{18}\text{NO}_5\text{S}$   $[\text{M}+\text{H}]^+$ :  $m/z$  348.0900  $[\text{M}+\text{H}]^+$ , found:  $m/z$  348.0900.

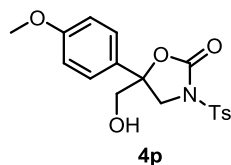

This compound was prepared according to the general procedure D as a white solid (32 mg, 84% yield in 0.1 mmol scale).

$R_f$  = 0.54, Petroleum ether/EtOAc = 1:1;  $^1\text{H}$  NMR (500 MHz, DMSO- $d_6$ )  $\delta$  7.85 (d,  $J$  = 8.4 Hz, 2H), 7.45 (d,  $J$  = 7.9 Hz, 2H), 7.31-7.26 (m, 2H), 6.99-6.92 (m, 1H),

5.73-5.55 (m, 1H), 4.51 (d,  $J = 9.3$  Hz, 1H), 4.09 (d,  $J = 9.3$  Hz, 1H), 3.76 (s, 3H), 3.60 (dd,  $J = 12.3, 6.0$  Hz, 1H), 3.53 (dd,  $J = 12.3, 5.5$  Hz, 1H), 2.41 (s, 3H).

$^{13}\text{C}$  NMR (126 MHz, DMSO)  $\delta$  159.23, 150.81, 145.48, 133.86, 130.67, 129.89, 127.72, 126.05, 113.99, 84.02, 66.32, 55.17, 51.74, 21.10.

HRMS (ESI) exact mass calcd for  $\text{C}_{18}\text{H}_{20}\text{NO}_6\text{S}$   $[\text{M}+\text{H}]^+$ :  $m/z$  378.1002  $[\text{M}+\text{H}]^+$ , found:  $m/z$  378.1006.

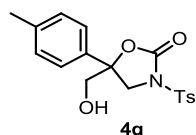

This compound was prepared according to the general procedure D as a white solid (32 mg, 88% yield in 0.1 mmol scale).

$R_f = 0.52$ , Petroleum ether/EtOAc = 1:1;  $^1\text{H}$  NMR (500 MHz,  $\text{CDCl}_3$ )  $\delta$  7.89 (d,  $J = 8.4$  Hz, 2H), 7.31 (d,  $J = 8.1$  Hz, 2H), 7.21-7.14 (m, 4H), 4.54 (d,  $J = 8.9$  Hz, 1H), 4.12 (d,  $J = 8.9$  Hz, 1H), 3.78 (d,  $J = 12.7$  Hz, 1H), 3.65 (d,  $J = 12.7$  Hz, 1H), 2.42 (s, 3H), 2.35 (s, 3H).

$^{13}\text{C}$  NMR (126 MHz,  $\text{CDCl}_3$ )  $\delta$  151.52, 145.76, 139.03, 135.26, 134.25, 129.94, 129.73, 128.31, 124.50, 83.89, 67.89, 52.17, 21.82, 21.20.

HRMS (ESI) exact mass calcd for  $\text{C}_{18}\text{H}_{20}\text{NO}_5\text{S}$   $[\text{M}+\text{H}]^+$ :  $m/z$  362.1057  $[\text{M}+\text{H}]^+$ , found:  $m/z$  362.1057.

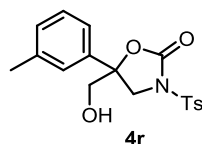

This compound was prepared according to the general procedure D as a white solid (30 mg, 83% yield in 0.1 mmol scale).

$R_f = 0.53$ , Petroleum ether/EtOAc = 1:1;  $^1\text{H}$  NMR (500 MHz, Acetone)  $\delta$  7.90 (d,  $J = 8.4$  Hz, 2H), 7.43 (d,  $J = 8.0$  Hz, 2H), 7.33-7.26 (m, 1H), 7.24-7.16 (m, 3H), 4.80-4.73 (m, 1H), 4.64 (d,  $J = 9.2$  Hz, 1H), 4.17 (d,  $J = 9.2$  Hz, 1H), 3.84-3.71 (m, 2H), 2.43 (s, 3H), 2.34 (s, 3H).

$^{13}\text{C}$  NMR (126 MHz, Acetone)  $\delta$  151.81, 146.40, 140.26, 139.29, 135.67, 130.58, 130.02, 129.49, 128.95, 126.09, 122.58, 84.75, 68.05, 52.90, 21.55, 21.44.

HRMS (ESI) exact mass calcd for C<sub>18</sub>H<sub>20</sub>NO<sub>5</sub>S [M+H]<sup>+</sup>: m/z 362.1057 [M+H]<sup>+</sup>, found: m/z 362.1057.

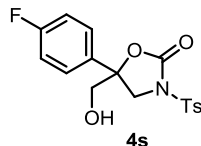

This compound was prepared according to the general procedure D as a white solid (30 mg, 82% yield in 0.1 mmol scale).

R<sub>f</sub> = 0.53, Petroleum ether/EtOAc = 1:1; <sup>1</sup>H NMR (500 MHz, Acetone) δ 7.90 (d, *J* = 8.4 Hz, 2H), 7.50-7.45 (m, 2H), 7.43 (d, *J* = 8.1 Hz, 2H), 7.23-7.15 (m, 2H), 4.87-4.73 (m, 1H), 4.65 (d, *J* = 9.3 Hz, 1H), 4.19 (d, *J* = 9.3 Hz, 1H), 3.88-3.72 (m, 2H), 2.44 (s, 3H).

<sup>13</sup>C NMR (126 MHz, Acetone) δ 163.49 (d, *J* = 245.7 Hz), 151.66, 146.47, 136.40 (d, *J* = 3.2 Hz), 135.64, 130.60, 128.97, 127.95 (d, *J* = 8.5 Hz), 116.32 (d, *J* = 21.9 Hz), 84.38, 67.94, 52.87, 21.55.

HRMS (ESI) exact mass calcd for C<sub>17</sub>H<sub>17</sub>FNO<sub>5</sub>S [M+H]<sup>+</sup>: m/z 366.0807 [M+H]<sup>+</sup>, found: m/z 366.0806.

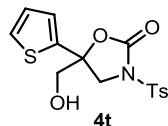

This compound was prepared according to the general procedure D as a white solid (24 mg, 69% yield in 0.1 mmol scale).

R<sub>f</sub> = 0.51, Petroleum ether/EtOAc = 1:1; <sup>1</sup>H NMR (500 MHz, Acetone) δ 7.92 (d, *J* = 8.4 Hz, 2H), 7.55-7.51 (m, 1H), 7.46 (d, *J* = 7.8 Hz, 2H), 7.25-7.21 (m, 1H), 7.10-7.06 (m, 1H), 4.96-4.86 (m, 1H), 4.60 (d, *J* = 9.4 Hz, 1H), 4.28 (d, *J* = 9.4 Hz, 1H), 4.00-3.92 (m, 1H), 3.92-3.83 (m, 1H), 2.45 (s, 3H).

<sup>13</sup>C NMR (126 MHz, Acetone) δ 151.43, 146.57, 142.70, 135.52, 130.65, 128.99, 128.24, 127.26, 125.90, 83.02, 67.21, 53.18, 21.57.

HRMS (ESI) exact mass calcd for C<sub>15</sub>H<sub>16</sub>NO<sub>5</sub>S<sub>2</sub> [M+H]<sup>+</sup>: m/z 354.0464 [M+H]<sup>+</sup>, found: m/z 354.0464.

## 5. Derivatization of the oxazolidin-2-one product.

### Gram scale synthesis of 4g, 4n, 4q

To a solution of corresponding *oxetone* (2.8 mmol, 1.0 equiv) in dry CH<sub>2</sub>Cl<sub>2</sub> (28 mL) was added catalyst **C1** (0.28 mmol, 0.1 equiv) at room temperature. The reaction mixture was stirred until all starting material was consumed as judged by TLC. The solvent was removed under vacuum. The residue was purified by flash column chromatography (ethyl acetate/petroleum ether = 1/3 to 1/1, v/v) to afford the product **4**.

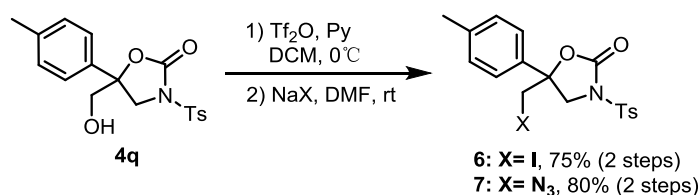

**General procedure E:** To a solution of **4q** (0.1 mmol, 1.0 equiv) in dry DCM (1 mL) was added pyridine (0.12 mmol, 1.2 equiv), and the mixture was cooled to 0°C. Then the Trifluoromethanesulfonic anhydride (0.12 mmol, 1.2 equiv) was added slowly. The mixture was stirred at the same temperature for 2 h to complete the reaction. The mixture was washed with HCl (1 N, 2×5 mL), water (3×5 mL), dried over Na<sub>2</sub>SO<sub>4</sub>, and concentrated in vacuo to afford the triflate which was used without further purification in the next step. The above triflate was taken in a 10 mL round bottomed flask which was charged with DMF (1 mL) and then cooled to 0 °C. To this solution, NaX (0.15 mmol, 1.5 equiv) was added. The mixture was stirred at room temperature for 3 h. Water (3 mL) was added. The organic layer was extracted with ethyl acetate (4×5 mL). The organic layers were combined and washed with brine (3×5 mL), filtered, dried over anhydrous Na<sub>2</sub>SO<sub>4</sub>, and concentrated under reduced pressure. The residue was purified by silica gel column chromatography (ethyl acetate/petroleum ether = 1/10, v/v) to afford the desired product.

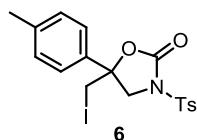

This compound was prepared according to the general procedure E as a Light yellow solid (19 mg, 75% two steps)



$R_f$  = 0.49, Petroleum ether/EtOAc = 3:1;  $^1\text{H}$  NMR (500 MHz, Acetone)  $\delta$  7.93-7.87 (m, 2H), 7.45 (d,  $J$  = 8.0 Hz, 2H), 7.37-7.32 (m, 2H), 7.25 (d,  $J$  = 7.9 Hz, 2H), 4.60-4.48 (m, 1H), 4.46-4.31 (m, 1H), 4.03-3.93 (m, 1H), 3.83-3.71 (m, 1H), 2.44 (s, 3H), 2.34 (s, 3H).

$^{13}\text{C}$  NMR (126 MHz, Acetone)  $\delta$  151.08, 146.90, 139.80, 137.53, 135.45, 130.85, 130.45, 129.21, 125.56, 81.68, 56.32, 21.71, 21.18, 14.68.

HRMS (ESI) exact mass calcd for  $\text{C}_{18}\text{H}_{19}\text{INO}_4\text{S}$   $[\text{M}+\text{H}]^+$ :  $m/z$  472.0072  $[\text{M}+\text{H}]^+$ , found:  $m/z$  472.0074.

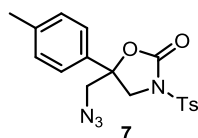

This compound was prepared according to the general procedure E as a white solid (31 mg, 80% two steps)

$R_f$  = 0.57, Petroleum ether/EtOAc = 3:1;  $^1\text{H}$  NMR (500 MHz, Acetone)  $\delta$  7.93-7.89 (m, 2H), 7.49-7.43 (m, 2H), 7.34-7.30 (m, 2H), 7.28-7.24 (m, 2H), 4.55 (d,  $J$  = 9.7 Hz, 1H), 4.22 (d,  $J$  = 9.7 Hz, 1H), 3.93-3.81 (m, 2H), 2.45 (s, 3H), 2.34 (s, 3H).

$^{13}\text{C}$  NMR (126 MHz, Acetone)  $\delta$  151.33, 146.82, 139.77, 136.96, 135.45, 130.77, 130.47, 129.10, 125.50, 83.33, 58.93, 54.08, 21.69, 21.16.

HRMS (ESI) exact mass calcd for  $\text{C}_{18}\text{H}_{19}\text{N}_4\text{O}_4\text{S}$   $[\text{M}+\text{H}]^+$ :  $m/z$  387.1122  $[\text{M}+\text{H}]^+$ , found:  $m/z$  387.1122.

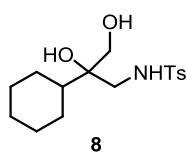

**8** was synthesized according to literature with little modification<sup>5</sup>. To a solution of **4g** (0.2 mmol, 1.0 equiv) in THF (3 mL) and water (1 mL) was added lithium hydroxide (0.4 mmol, 2.0 equiv) at room temperature. The mixture was stirred for 4 h. After addition of saturated  $\text{NH}_4\text{Cl}$  solution (4 mL), the reaction mixture was extracted with ethyl acetate (3×4 mL). The combined organic extracts were washed with brine (10 mL), dried over  $\text{Na}_2\text{SO}_4$ , filtered, and concentrated. The residue was purified by column chromatography on silica gel (petroleum ether/ethyl acetate = 3/1, v/v) to

5. Shen Z, Lu X, Lei A. *Tetrahedron* **2006**, 62, 9237-9246.

give compound **8** as white solid (47 mg, 72%).

$R_f$  = 0.55, Petroleum ether/EtOAc = 1:2;  $^1\text{H}$  NMR (500 MHz, Acetone)  $\delta$  7.85-7.68 (m, 2H), 7.48-7.33 (m, 2H), 6.20-6.04 (m, 1H), 3.85-3.70 (m, 1H), 3.59-3.49 (m, 2H), 3.33 (s, 1H), 3.07-2.92 (m, 2H), 2.42 (s, 3H), 1.82-1.68 (m, 4H), 1.64-1.55 (m, 2H), 1.24-1.03 (m, 5H).

$^{13}\text{C}$  NMR (126 MHz, Acetone)  $\delta$  143.89, 138.79, 130.49, 127.94, 75.09, 65.03, 47.71, 42.97, 27.62, 27.58, 27.41, 27.30, 27.21, 21.46.

HRMS (ESI) exact mass calcd for  $\text{C}_{16}\text{H}_{26}\text{NO}_4\text{S}$   $[\text{M}+\text{H}]^+$ :  $m/z$  328.1577  $[\text{M}+\text{H}]^+$ , found:  $m/z$  328.1577.

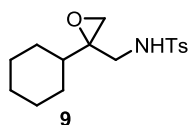

**9** was synthesized according to literature with little modification<sup>6</sup>. To a solution of  $\text{Ph}_3\text{P}$  (0.15 mmol, 1.5 equiv) in THF (2 mL) was added diethyl azodicarboxylate (0.15 mmol, 1.5 equiv) slowly at room temperature. After stirring at this temperature for 10 min, compound **8** (0.1 mmol, 1.0 equiv) in dry THF (0.5 mL) was added dropwise via syringe, and warm to 60°C. After the starting material was consumed as judged by TLC, the reaction mixture was rinsed through a pad of silica gel with  $\text{Et}_2\text{O}$ , evaporated and finally purified by flash column chromatography (petroleum ether/ethyl acetate = 5/1, v/v) the title compound **9** was obtained as yellow oil (24 mg, 78%).

$R_f$  = 0.51, Petroleum ether/EtOAc = 3:1;  $^1\text{H}$  NMR (500 MHz, Acetone)  $\delta$  7.77-7.73 (m, 2H), 7.42-7.37 (m, 2H), 6.40 (t,  $J$  = 6.6 Hz, 1H), 3.19-3.10 (m, 1H), 3.06-2.99 (m, 1H), 2.65-2.56 (m, 2H), 2.42 (s, 3H), 1.76-1.53 (m, 6H), 1.28-1.08 (m, 3H), 1.04-0.92 (m, 2H).

$^{13}\text{C}$  NMR (126 MHz, Acetone)  $\delta$  143.91, 139.16, 130.50, 127.87, 61.10, 49.18, 45.96, 40.12, 29.31, 28.19, 26.98, 26.94, 26.91, 21.47.

HRMS (ESI) exact mass calcd for  $\text{C}_{16}\text{H}_{24}\text{NO}_3\text{S}$   $[\text{M}+\text{H}]^+$ :  $m/z$  310.1473  $[\text{M}+\text{H}]^+$ , found:  $m/z$  310.1471.

6. Enders D, Gries J. *Synthesis* **2005**, 2005, 3508-3516.

## 6. Mechanism study of intramolecular ring opening of oxetanes

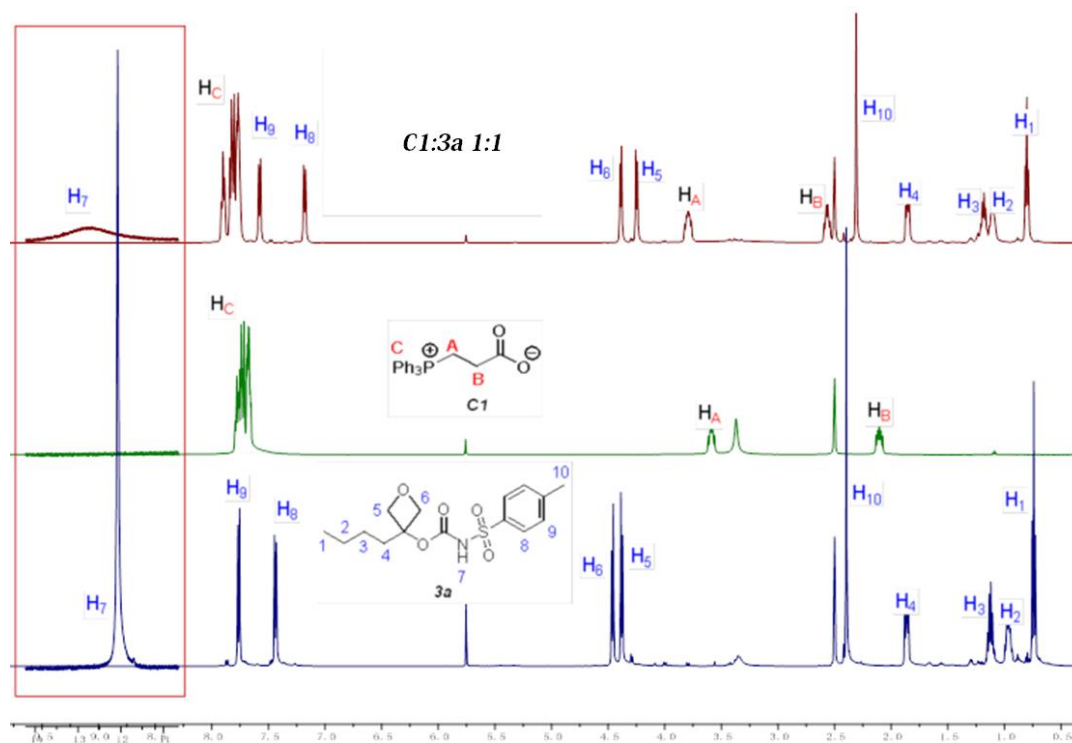

Figure S1. NMR spectrum of 1:1 mixture of oxetane 3a and carboxylate phosphobetaine C1, oxetane 3a and carboxylate phosphobetaine C1

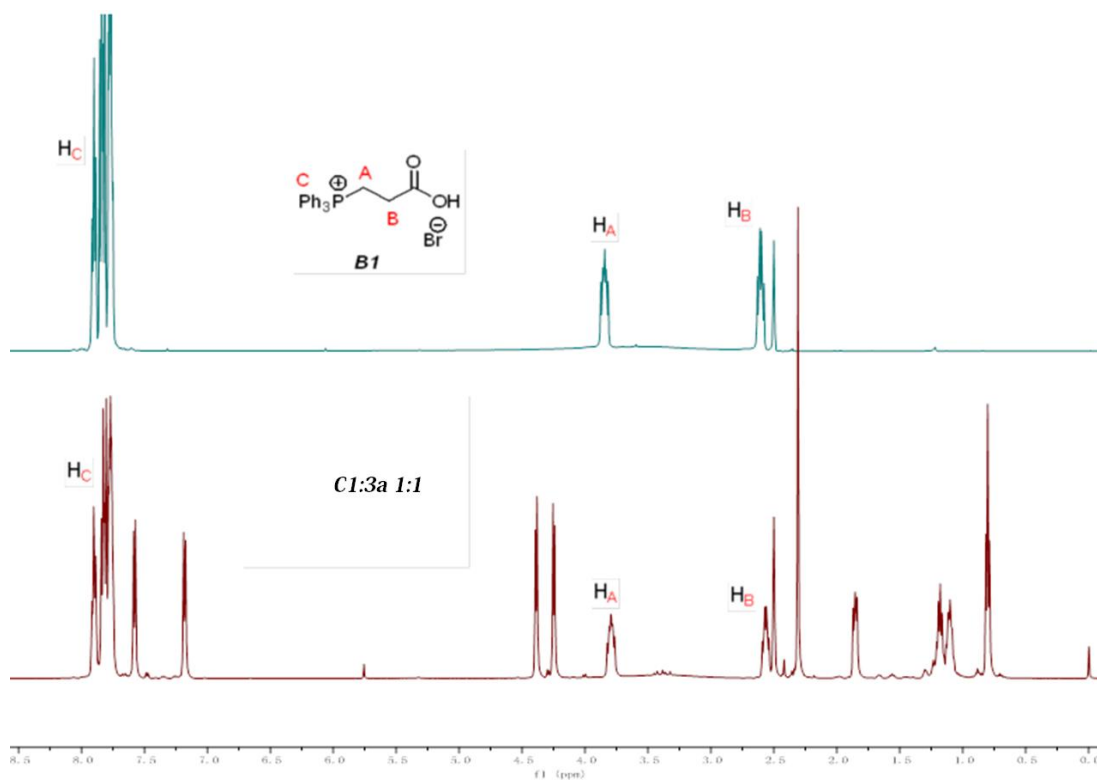

Figure S2. NMR spectrum of B1 and 1:1 mixture of oxetane 3a and carboxylate phosphobetaine C1

## 7. Preparation of catalyst

Catalysts **C5**<sup>7</sup> was prepared according to literature.

**C6** was purchased from commercial source

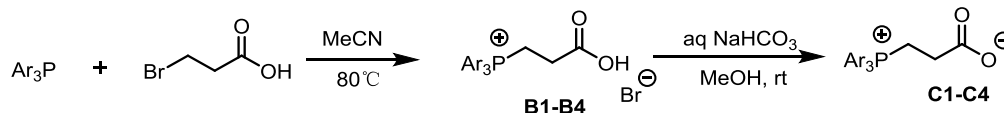

**General procedure for the synthesis of catalysts (C1-C4)**<sup>8-9</sup>: To a solution of 3-bromopropionic acid (5.0 mmol, 1.0 equiv) in acetonitrile (50 mL) was added corresponding triphenylphosphine (5.0 mmol, 1.0 equiv). The resulting mixture was stirred at 80 °C for 24 h and then concentrated in vacuo. The residue was taken up with a minimal amount of chloroform and the product was precipitated from diethyl ether. The white precipitate was filtered and recrystallized from acetonitrile to give the title compound **B** as a colorless solid.

All of the **B** was dissolved in methanol (25 mL) was added a solution of NaHCO<sub>3</sub> (6 mmol, 1.2 equiv) in water (10 mL). The resulting mixture was stirred at room temperature for 30 min and then concentrated in vacuo. The residue was taken up with a minimal amount of chloroform, dried over Na<sub>2</sub>SO<sub>4</sub>, filtered, and concentrated. and the residue was dissolved with chloroform again and the product **3** precipitated from diethyl ether.

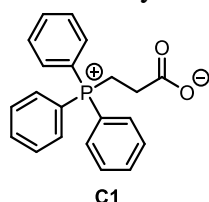

Catalyst **C1** was prepared according to the General procedure, **C1** was synthesized from commercial available triphenylphosphine as a white solid (1.34 g, 80%).

<sup>1</sup>H NMR (500 MHz, CDCl<sub>3</sub>) δ 7.85-7.72 (m, 3H), 7.70-7.58 (m, 12H), 3.61-3.51 (m, 2H), 2.64-2.51 (m, 2H).

- 
7. Yu C, Liu B, Hu L. *Journal of Organic Chemistry* **2001**, 66, (16), 5413-5418.
  8. Ahmed R, Altieri A, D Souza D M, Leigh D A. *Journal of the American Chemical Society* **2011**, 133, (31), 12304-12310.
  9. Aly A A M, Schmidbaur H. *Z. Naturforsch*, 1991, 46, 775.

$^{13}\text{C}$  NMR (126 MHz,  $\text{CDCl}_3$ )  $\delta$  172.35, 134.98 (d,  $J = 3.0$  Hz), 133.40 (d,  $J = 9.8$  Hz), 130.47 (d,  $J = 12.4$  Hz), 119.49 (d,  $J = 86.7$  Hz), 29.99 (d,  $J = 5.0$  Hz), 20.92 (d,  $J = 51.7$  Hz).

$^{31}\text{P}$  NMR (202 MHz,  $\text{CDCl}_3$ )  $\delta$  24.02.

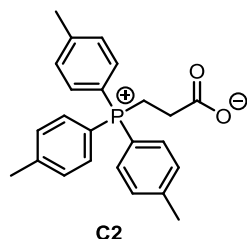

Catalyst **C2** was prepared according to the General procedure, **C2** was synthesized from commercial available *tri*-*p*-tolylphosphine as a white solid (1.6 g, 83%).

$^1\text{H}$  NMR (500 MHz,  $\text{DMSO}-d_6$ )  $\delta$  7.67-7.60 (m, 6H), 7.56-7.50 (m, 6H), 3.58-3.49 (m, 2H), 2.42 (s, 9H), 2.15-2.03 (m, 2H).

$^{13}\text{C}$  NMR (126 MHz,  $\text{DMSO}-d_6$ )  $\delta$  172.52, 145.67 (d,  $J = 3.1$  Hz), 133.79 (d,  $J = 10.2$  Hz), 131.12 (d,  $J = 12.7$  Hz), 116.74 (d,  $J = 88.2$  Hz), 30.20 (d,  $J = 4.8$  Hz), 19.21 (d,  $J = 51.7$  Hz).

$^{31}\text{P}$  NMR (202 MHz,  $\text{DMSO}$ )  $\delta$  23.40.

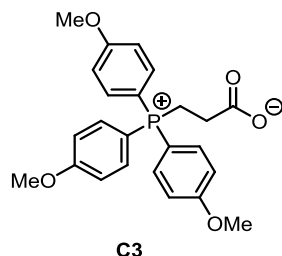

Catalyst **C3** was prepared according to the General procedure, **C3** was synthesized from commercial available tris (4-methoxyphenyl) phosphine as a white solid (1.5 g, 70%).

$^1\text{H}$  NMR (500 MHz,  $\text{DMSO}-d_6$ )  $\delta$  7.73-7.55 (m, 6H), 7.31-7.17 (m, 6H), 3.86 (s, 9H), 3.50-3.44 (m, 2H), 2.32-2.10 (m, 2H).

$^{13}\text{C}$  NMR (126 MHz,  $\text{DMSO}-d_6$ )  $\delta$  175.15, 164.35 (d,  $J = 2.9$  Hz), 135.85 (d,  $J = 11.5$  Hz), 116.35 (d,  $J = 13.5$  Hz), 110.01 (d,  $J = 93.6$  Hz), 56.45, 29.66, 19.25 (d,  $J = 52.7$  Hz).

$^{31}\text{P}$  NMR (202 MHz, DMSO)  $\delta$  22.21.

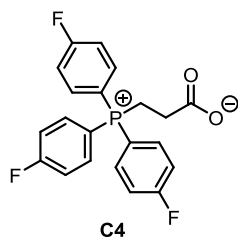

Catalyst **C4** was prepared according to the General procedure, **C4** was synthesized from commercial available Tris (4-fluorophenyl) phosphine as a white solid (1.4 g, 71%).

$^1\text{H}$  NMR (500 MHz, DMSO-*d*<sub>6</sub>)  $\delta$  7.95-7.81 (m, 6H), 7.70-7.51 (m, 6H), 3.80-3.64 (m, 2H), 2.33-2.13 (m, 2H).

$^{13}\text{C}$  NMR (126 MHz, DMSO-*d*<sub>6</sub>)  $\delta$  174.35, 165.22 (d,  $J$  = 3.6 Hz), 137.39 (t,  $J$  = 10.8 Hz), 118.18 (dd,  $J$  = 22.2, 14.0 Hz), 115.89 (d,  $J$  = 87.6 Hz), 29.68, 19.14 (d,  $J$  = 53.0 Hz).

$^{31}\text{P}$  NMR (202 MHz, DMSO)  $\delta$  23.64.

## 8. Copies of spectrums

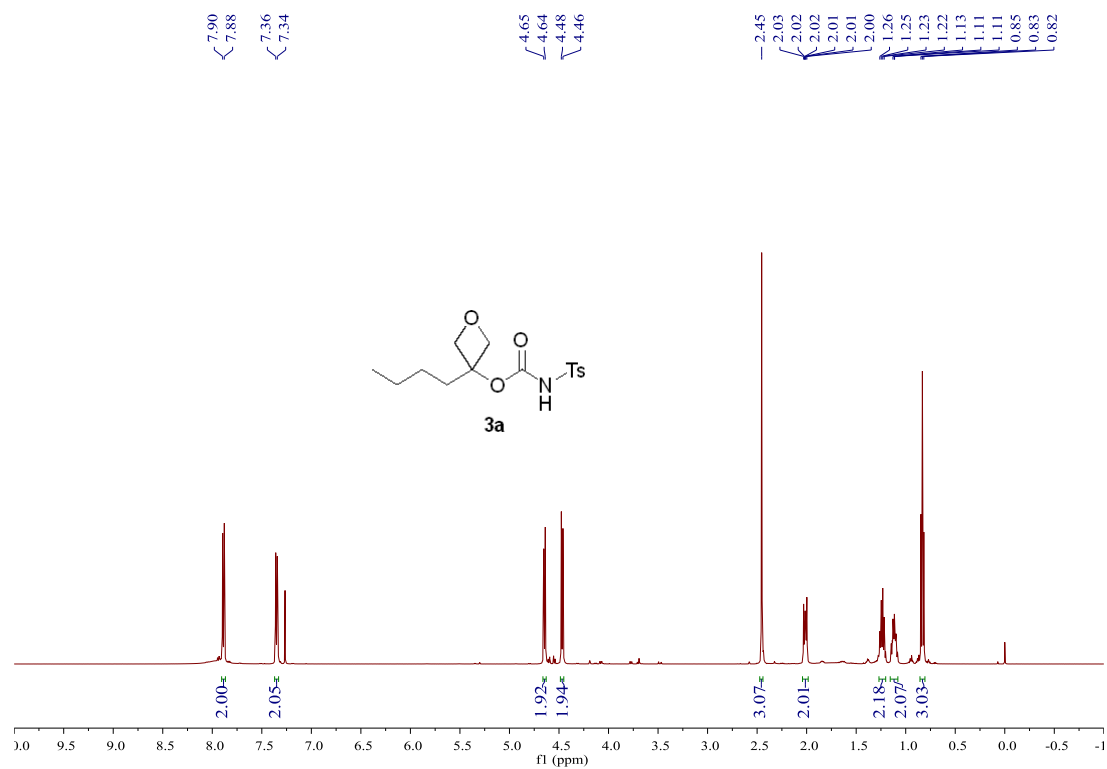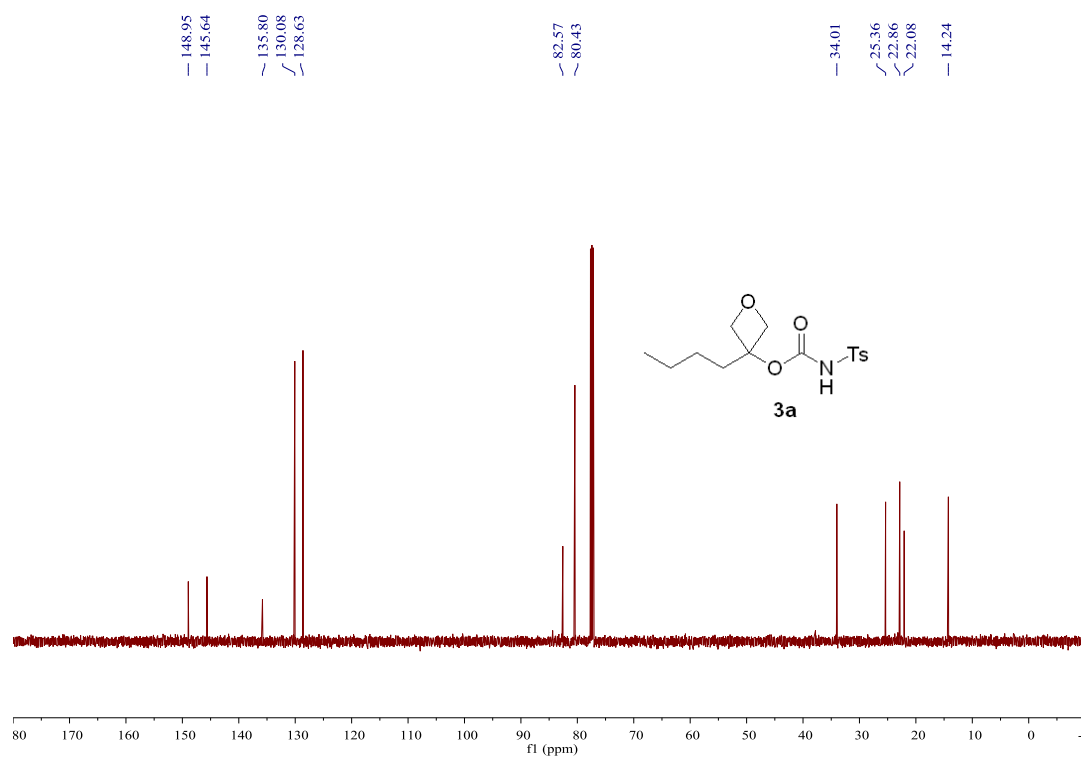

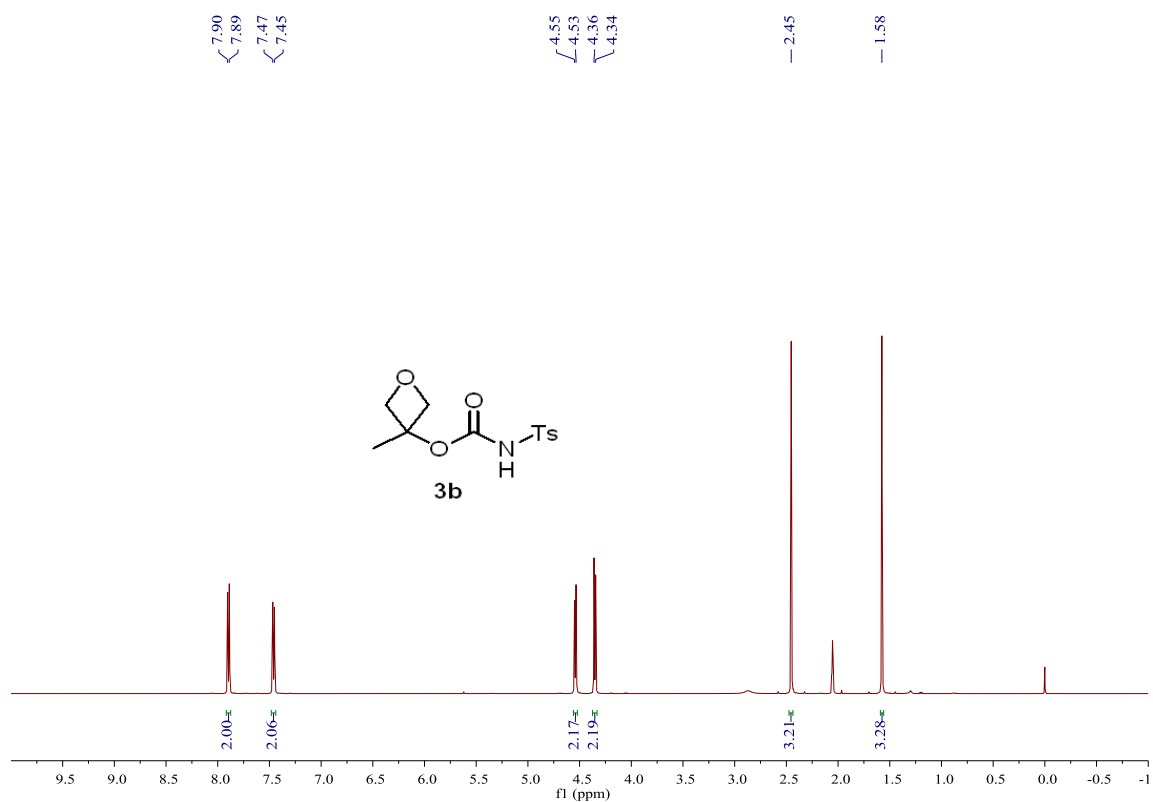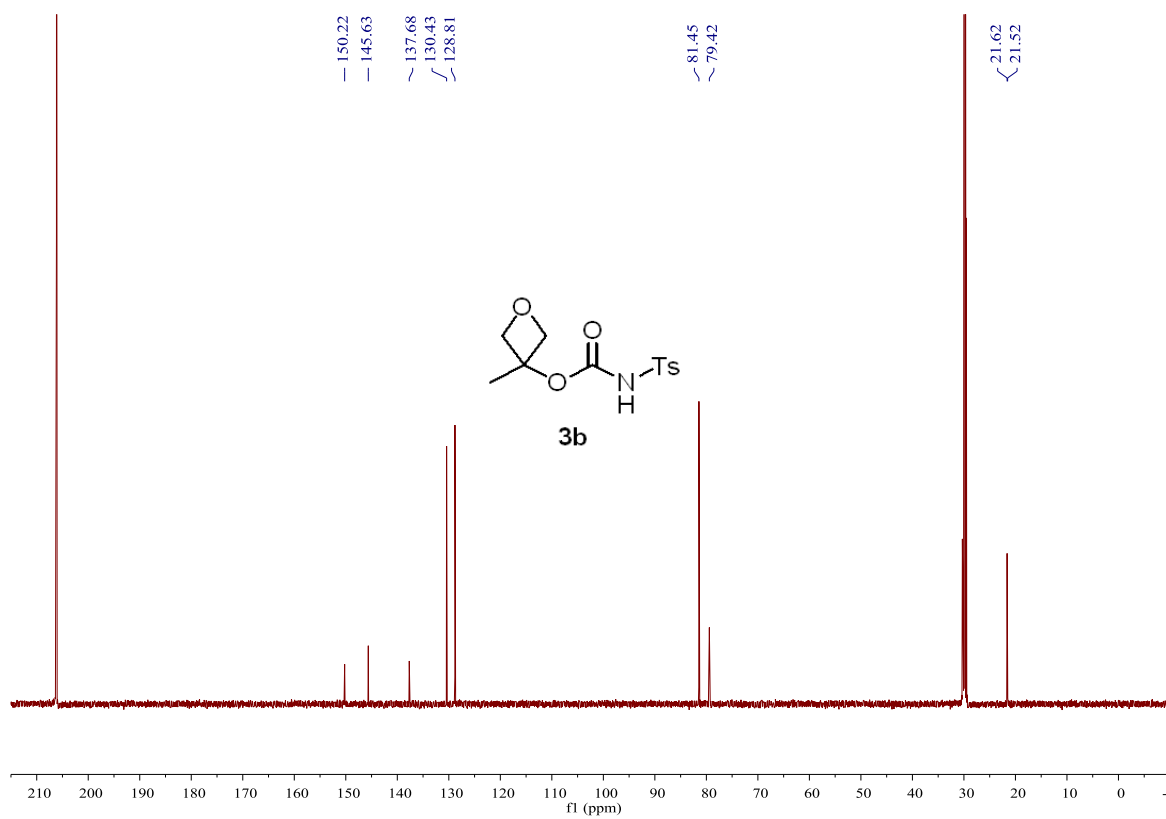



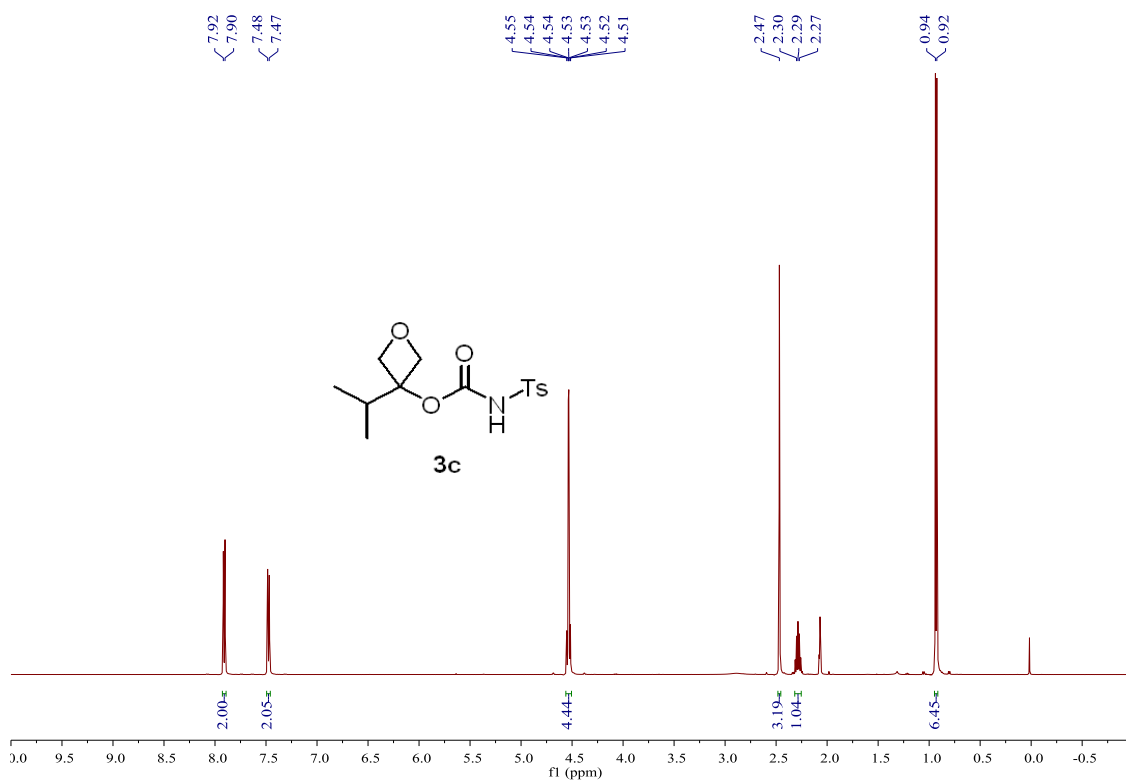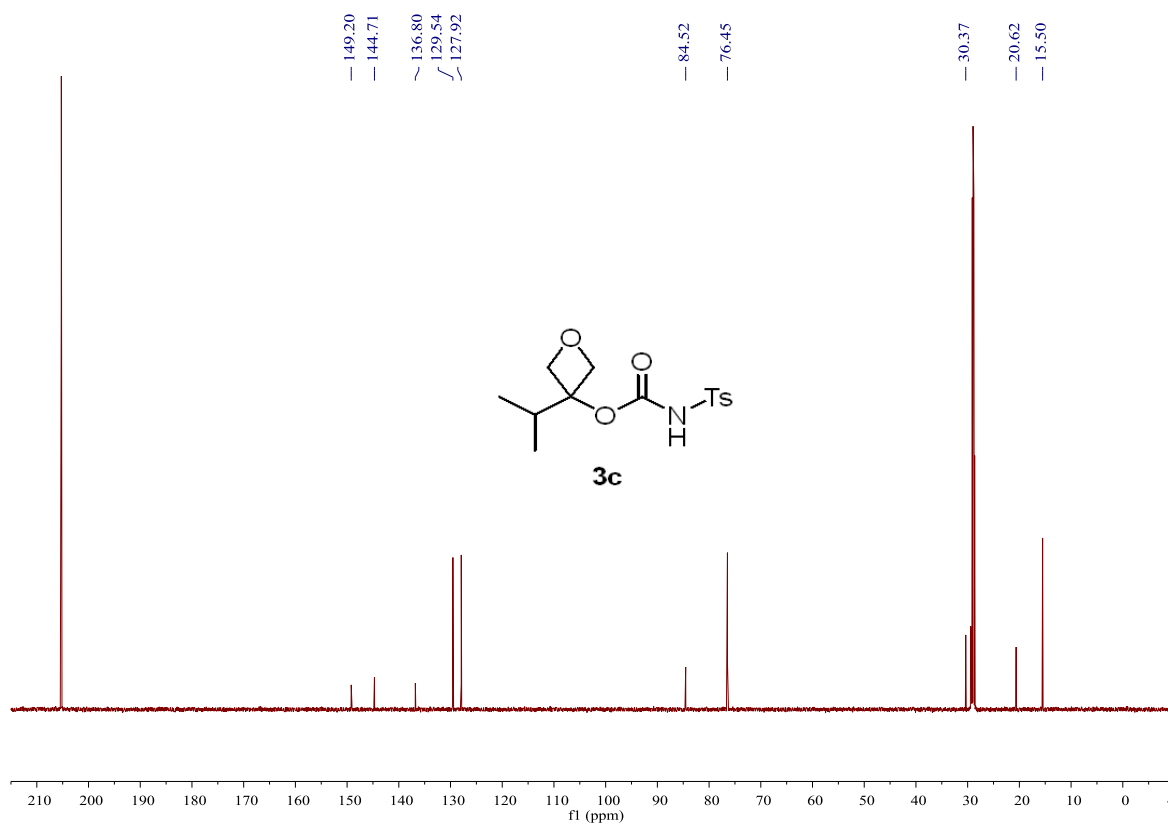

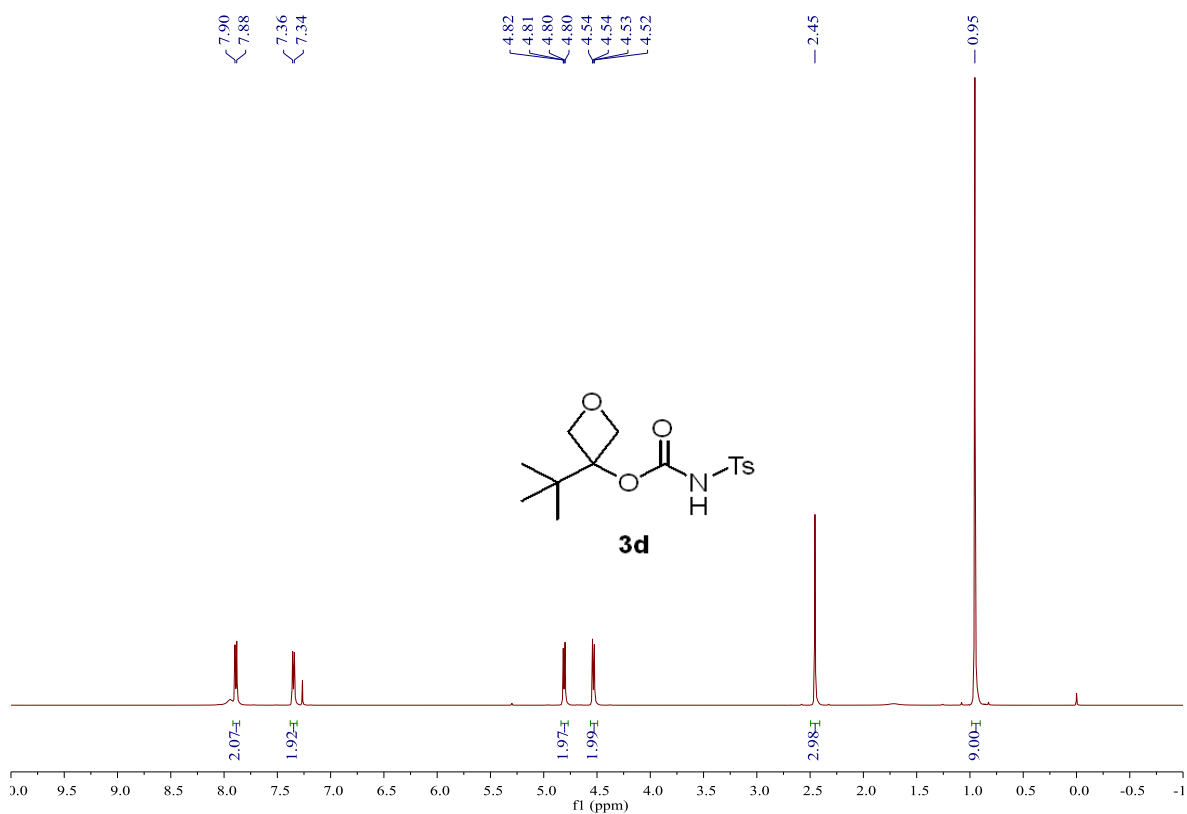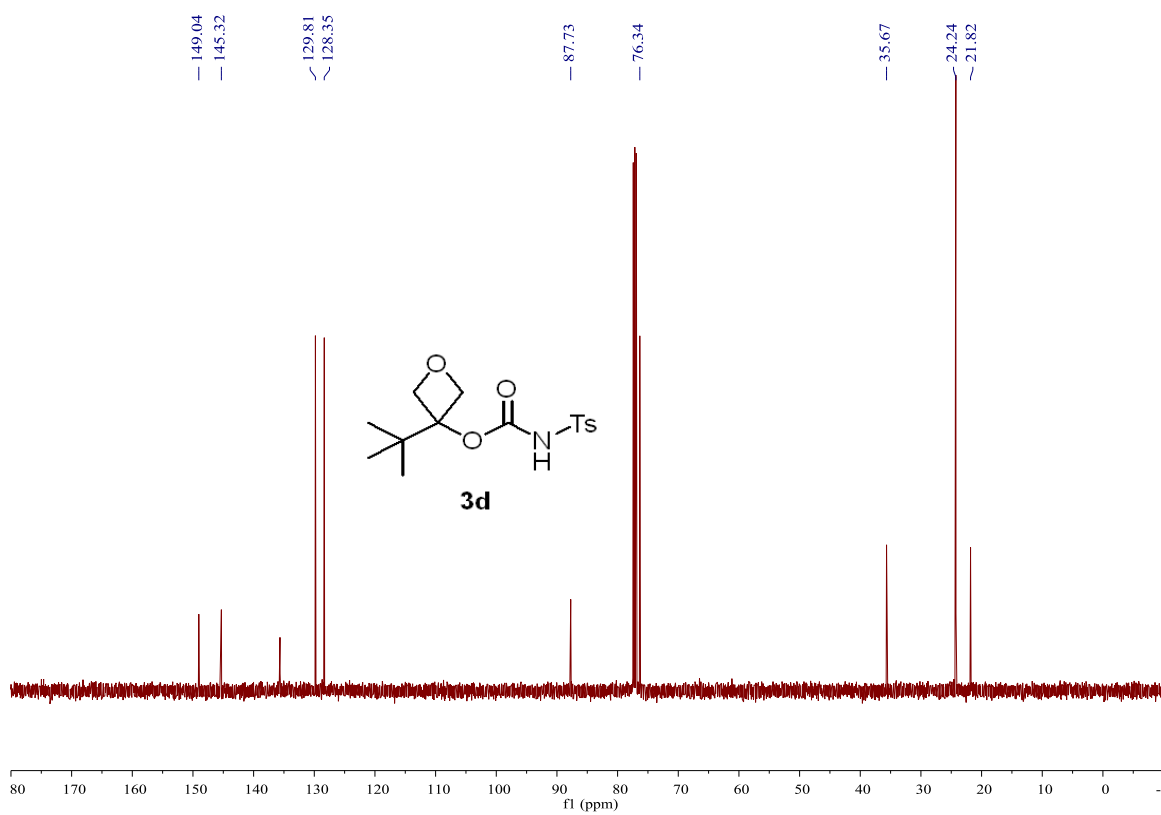

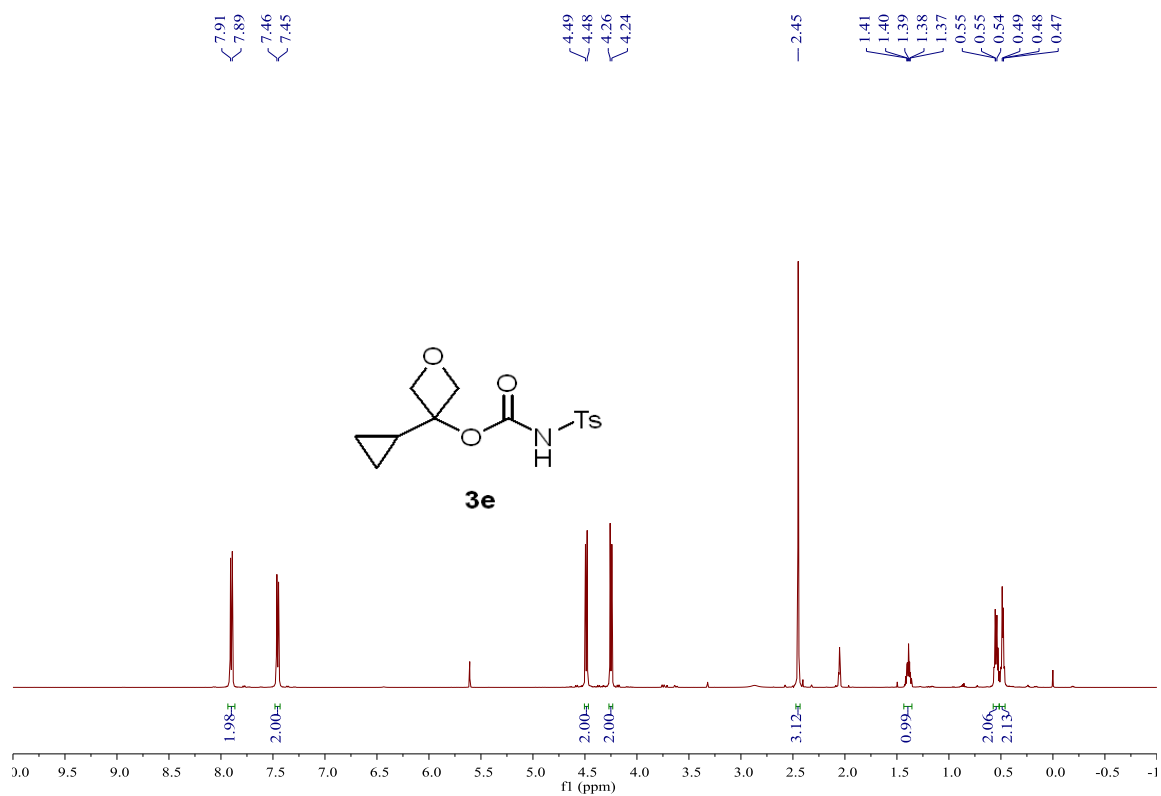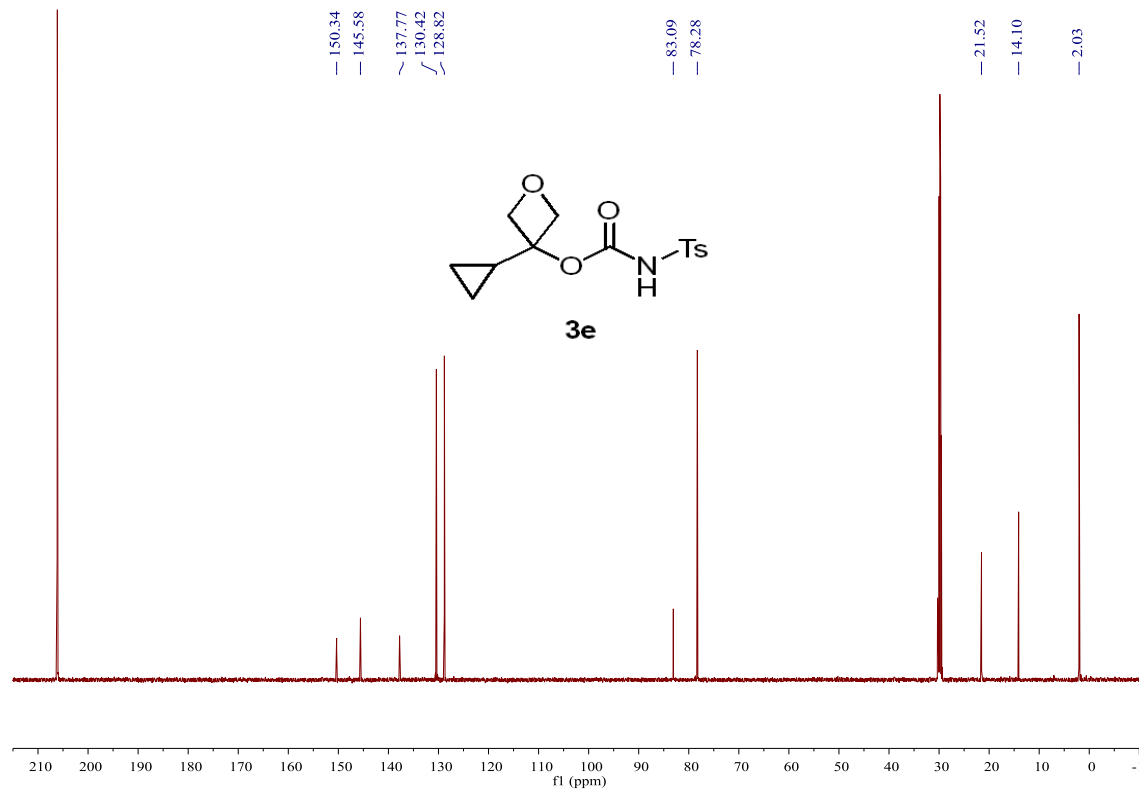

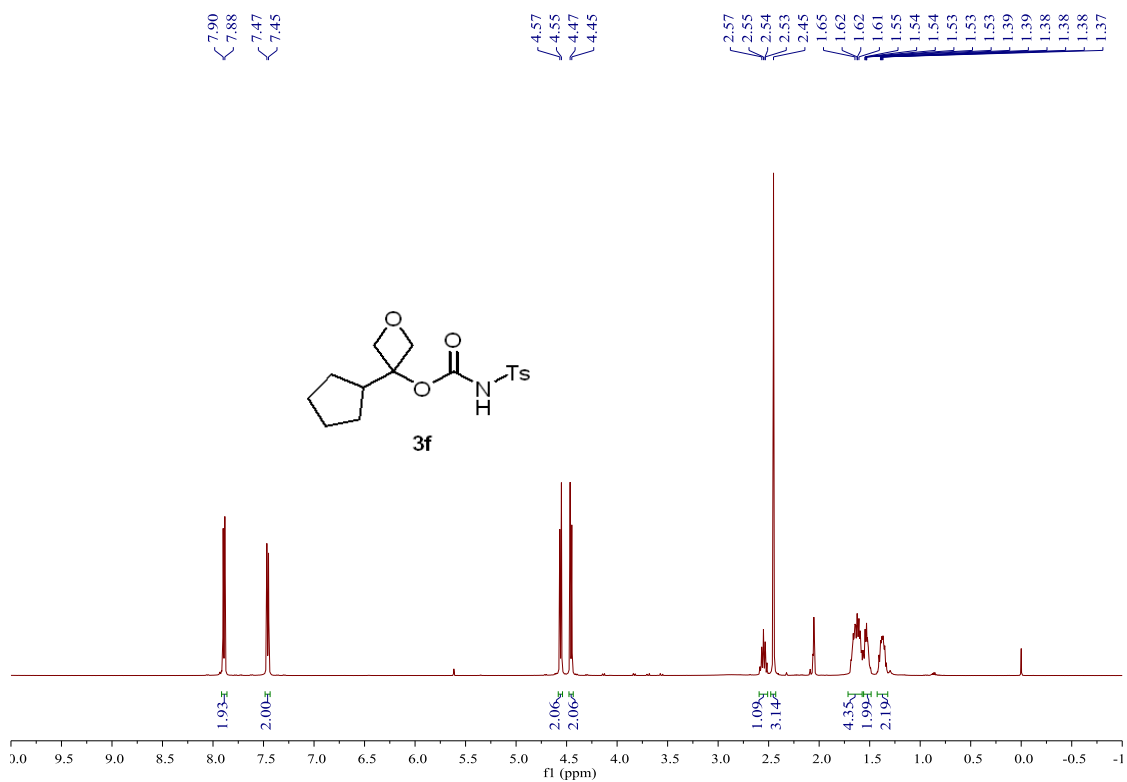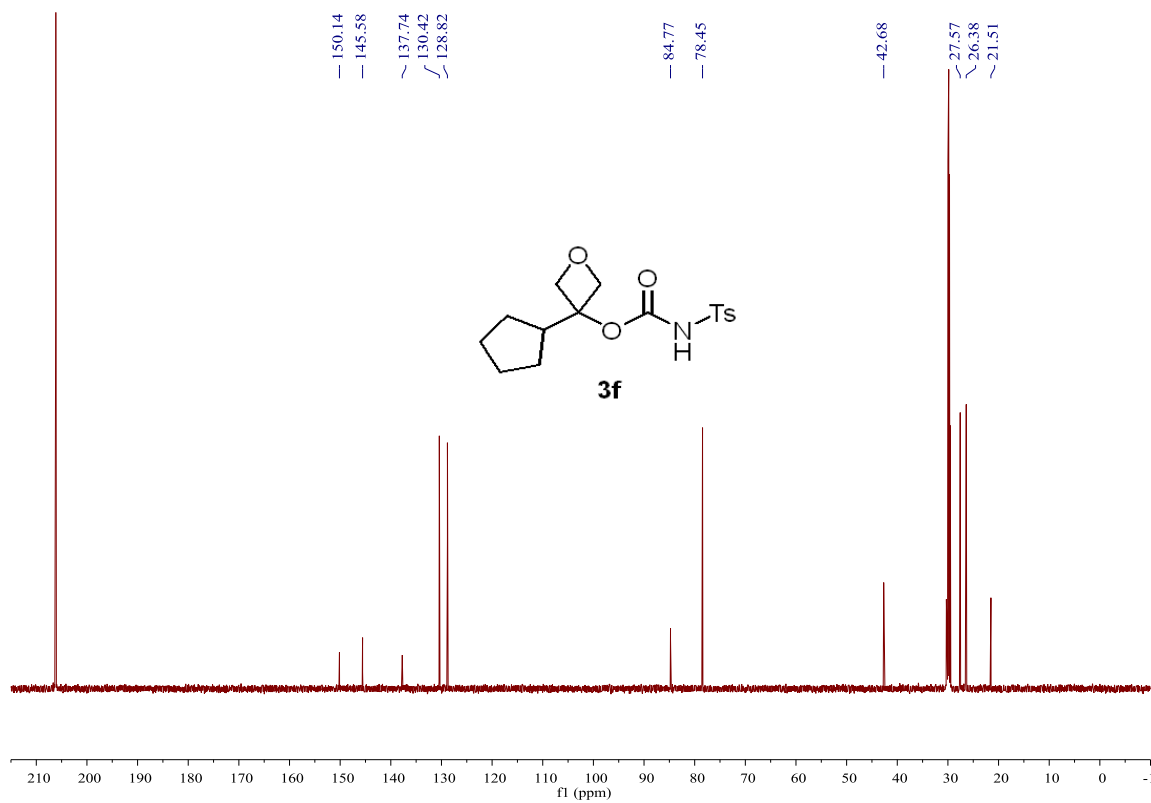

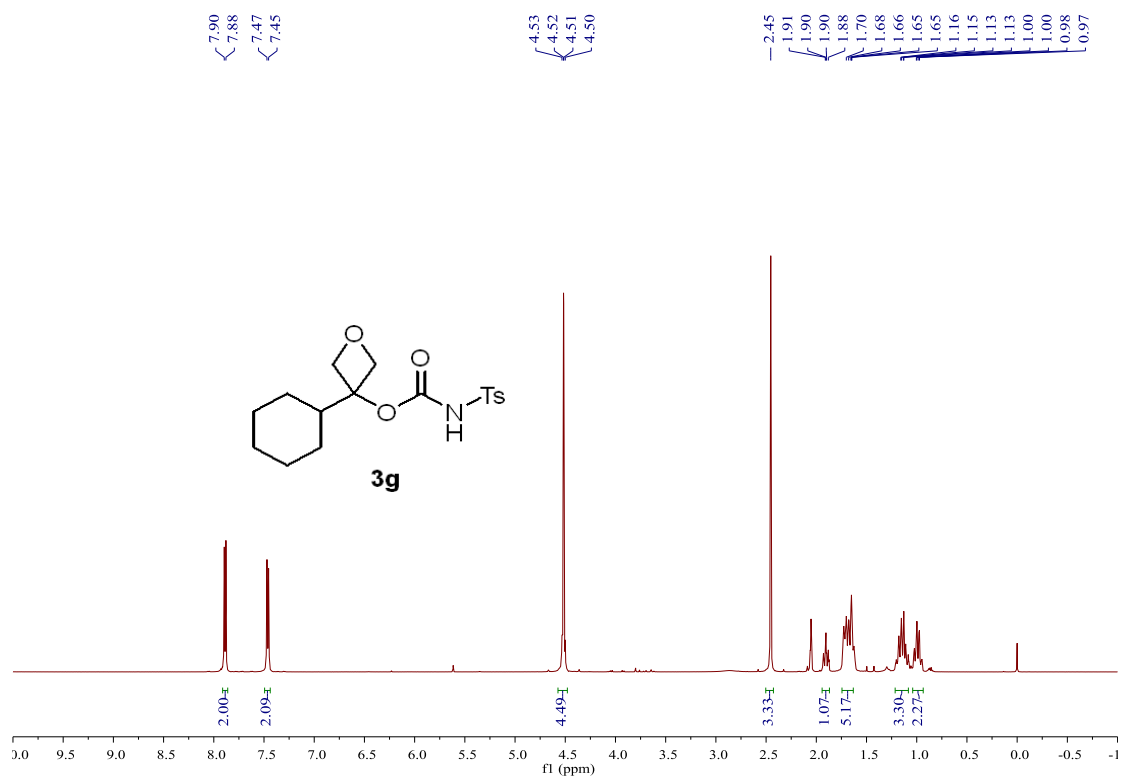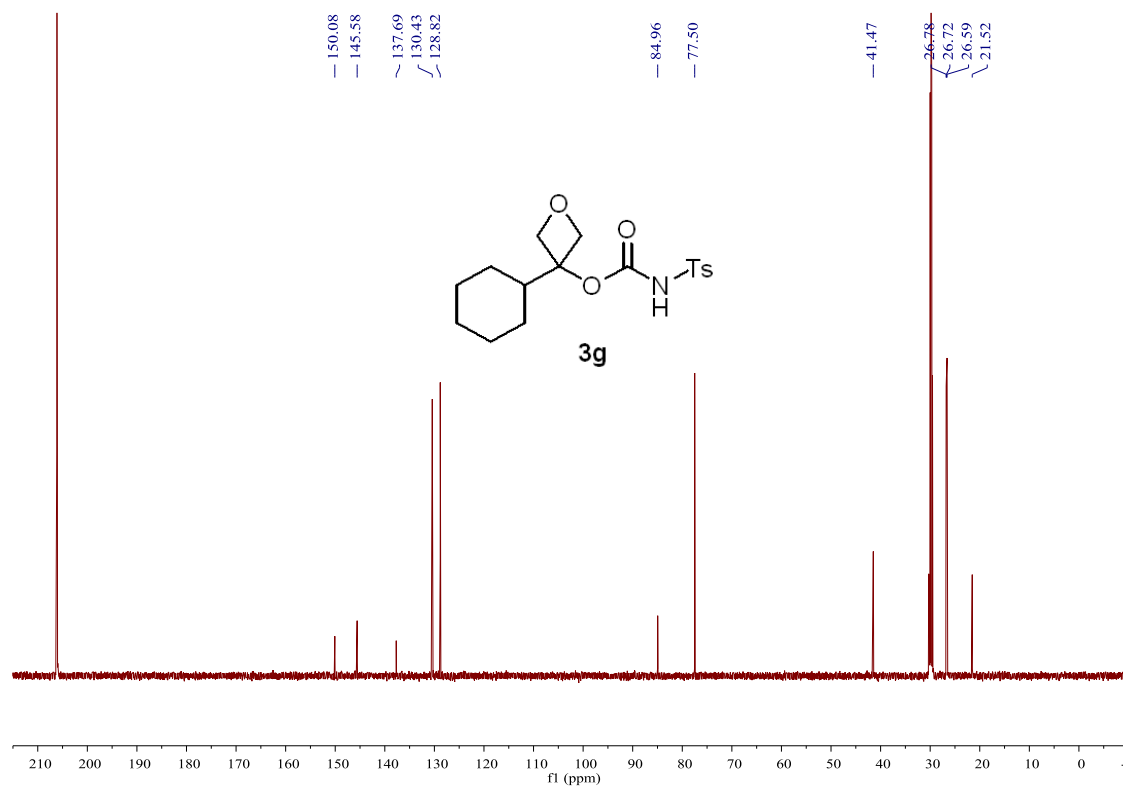

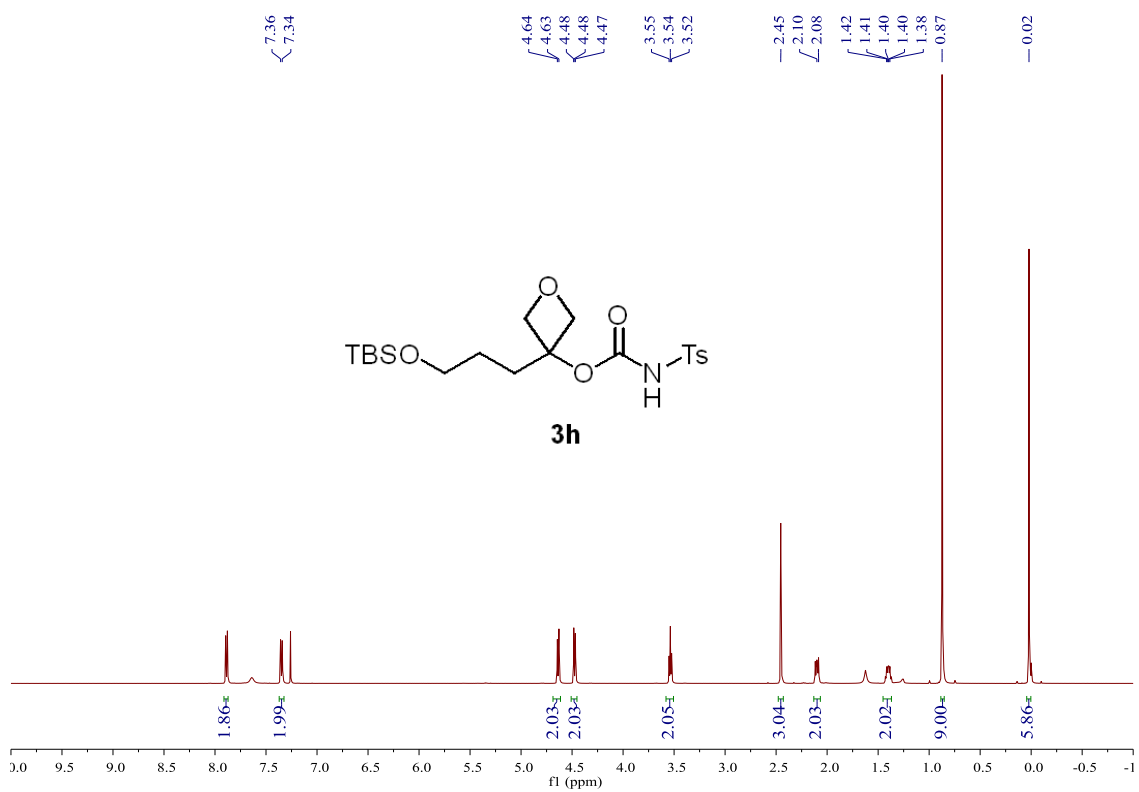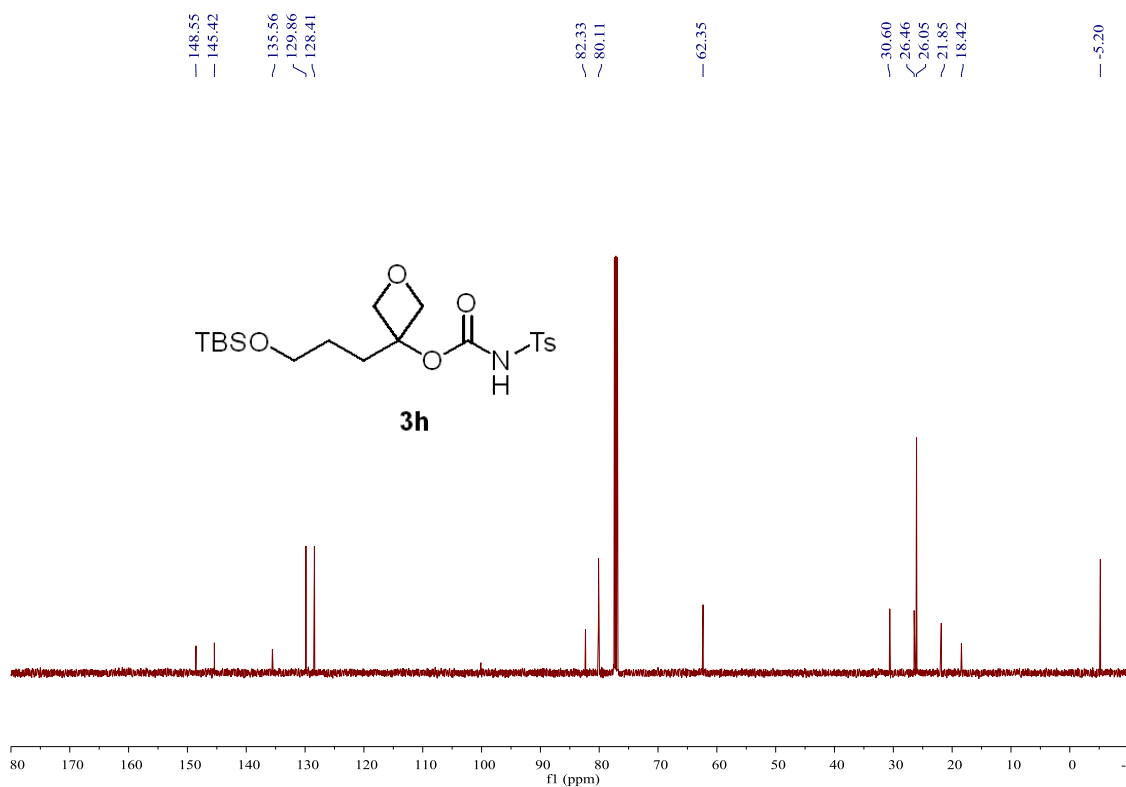

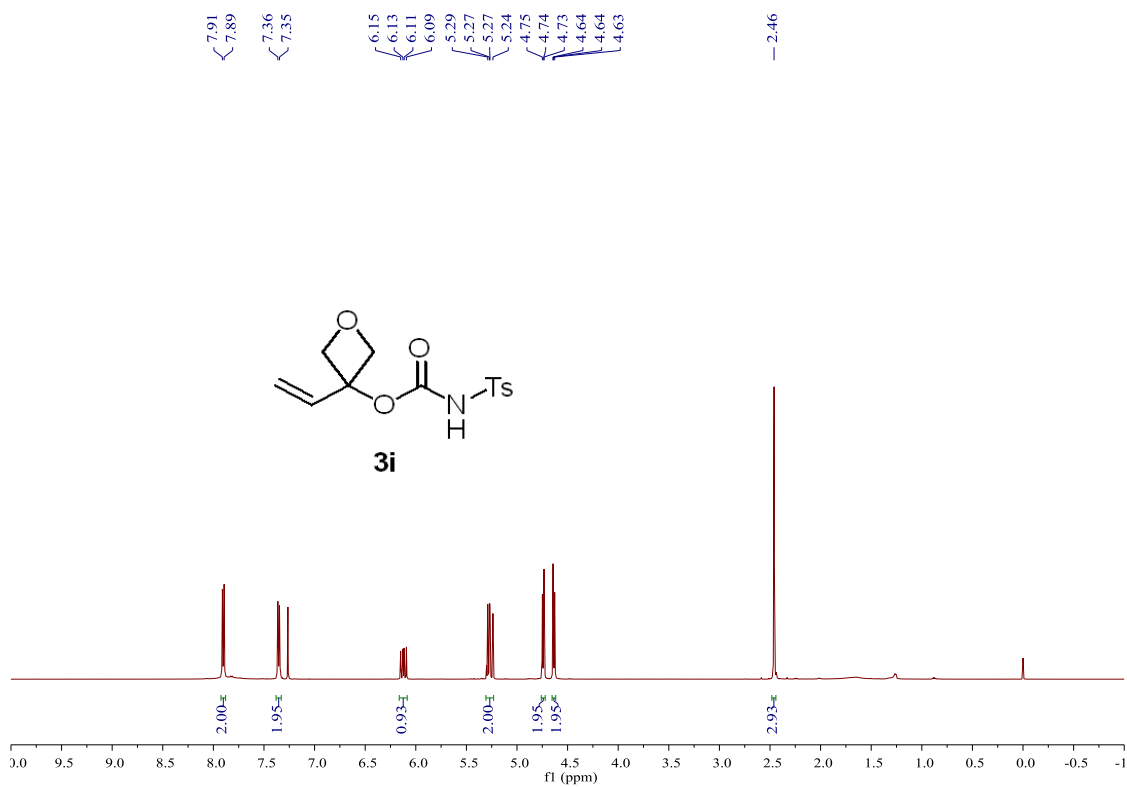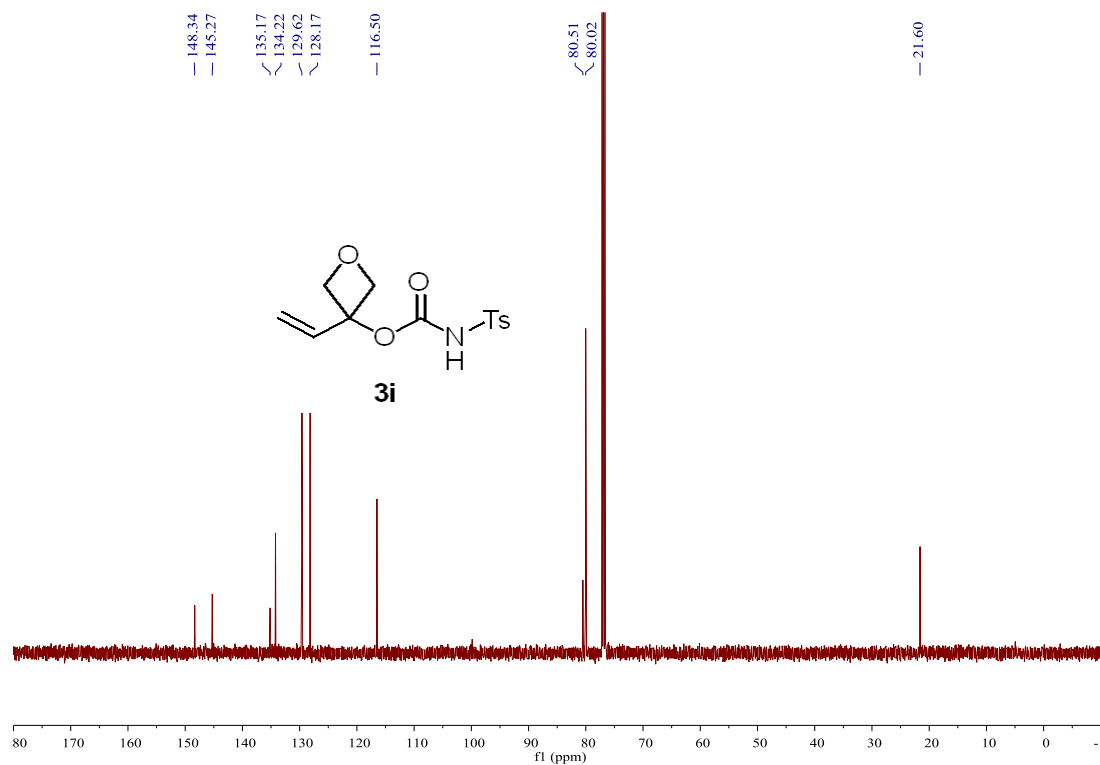

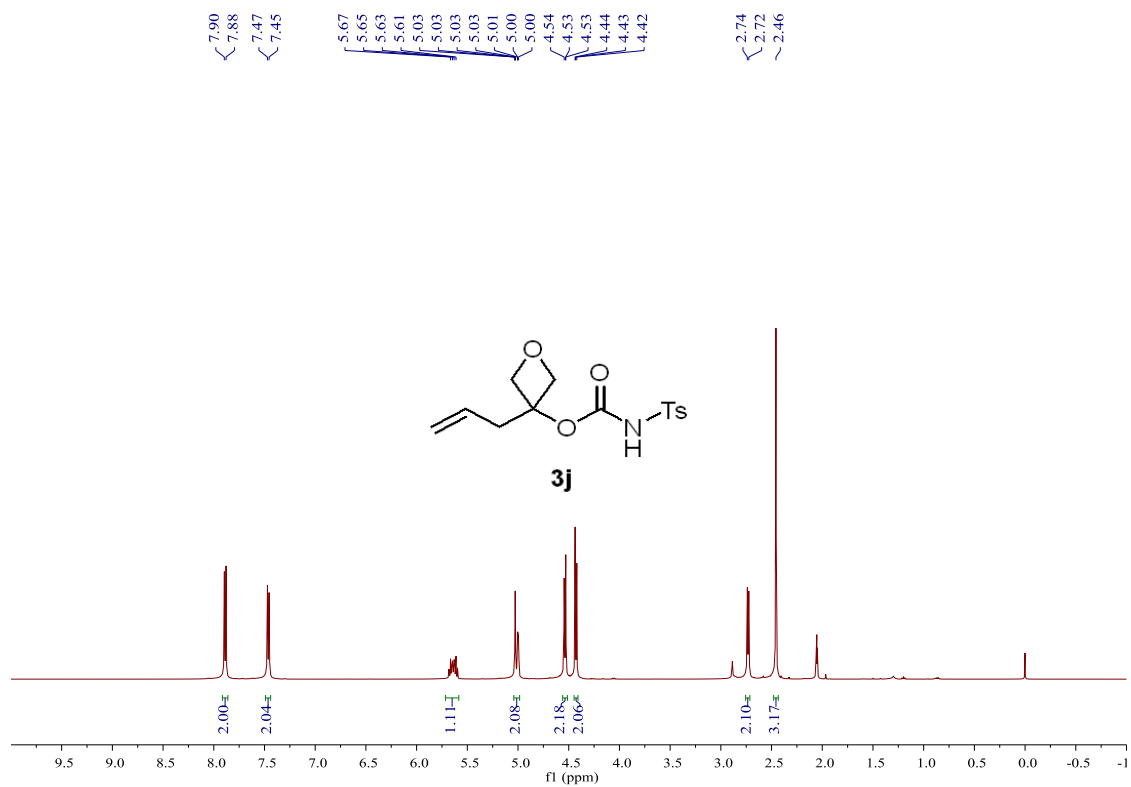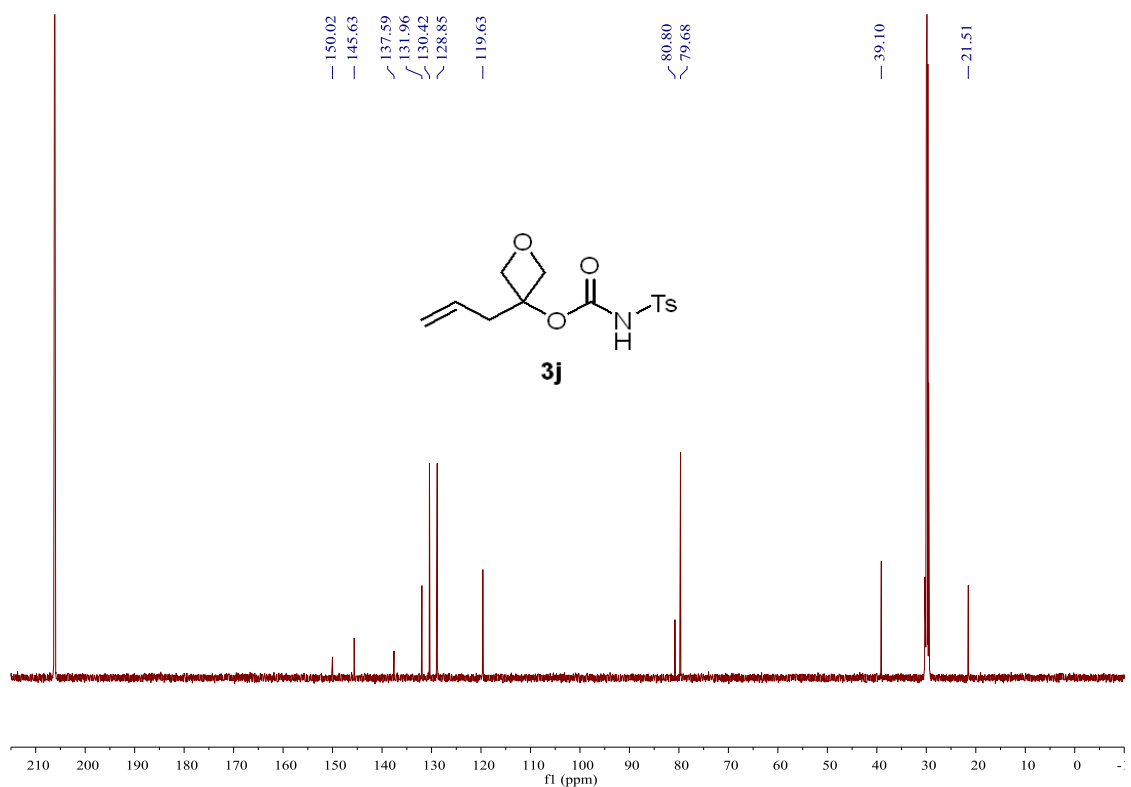



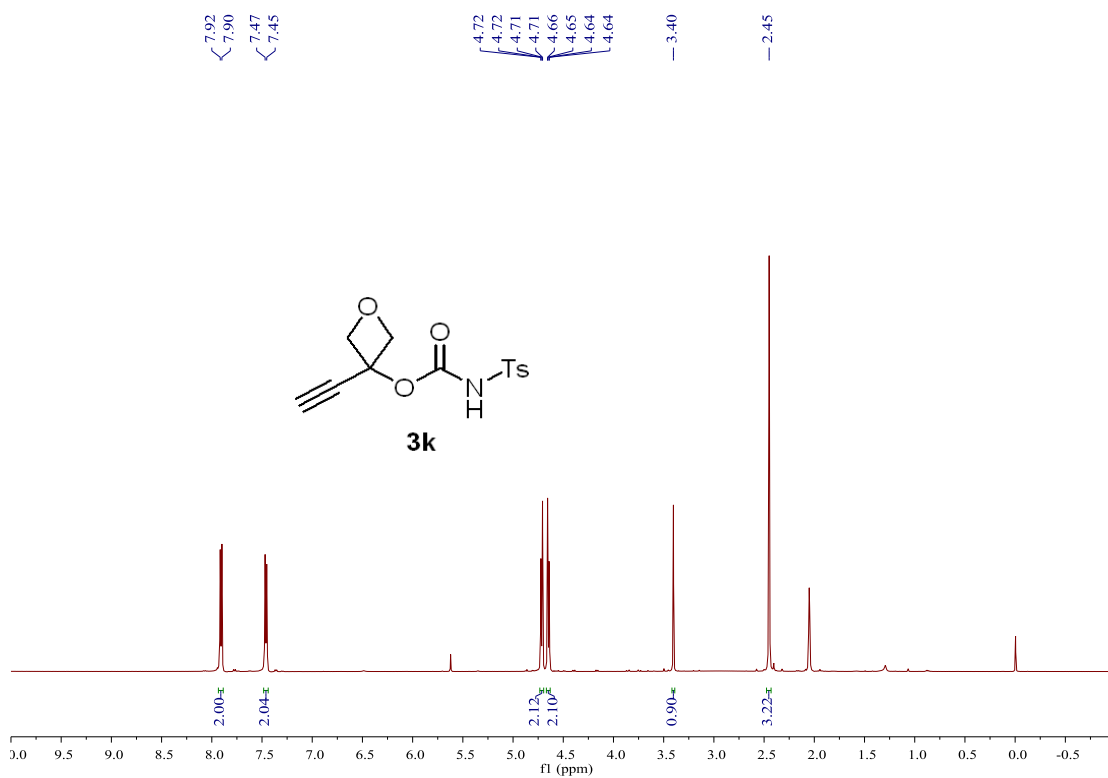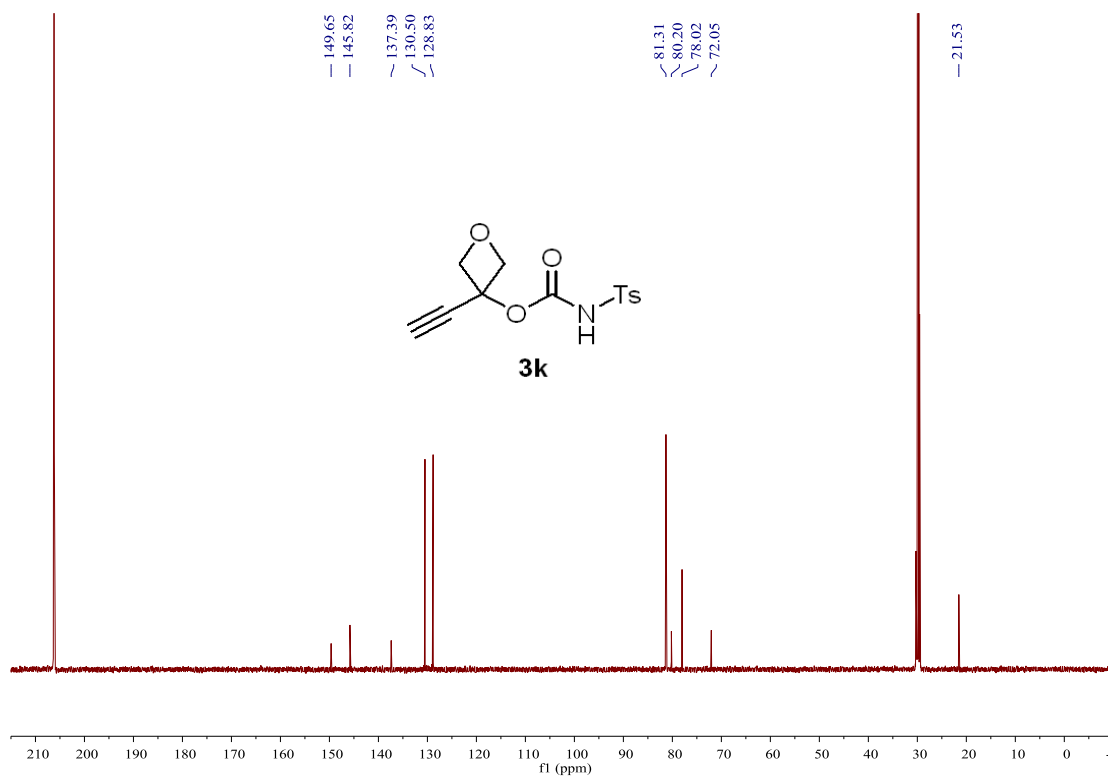

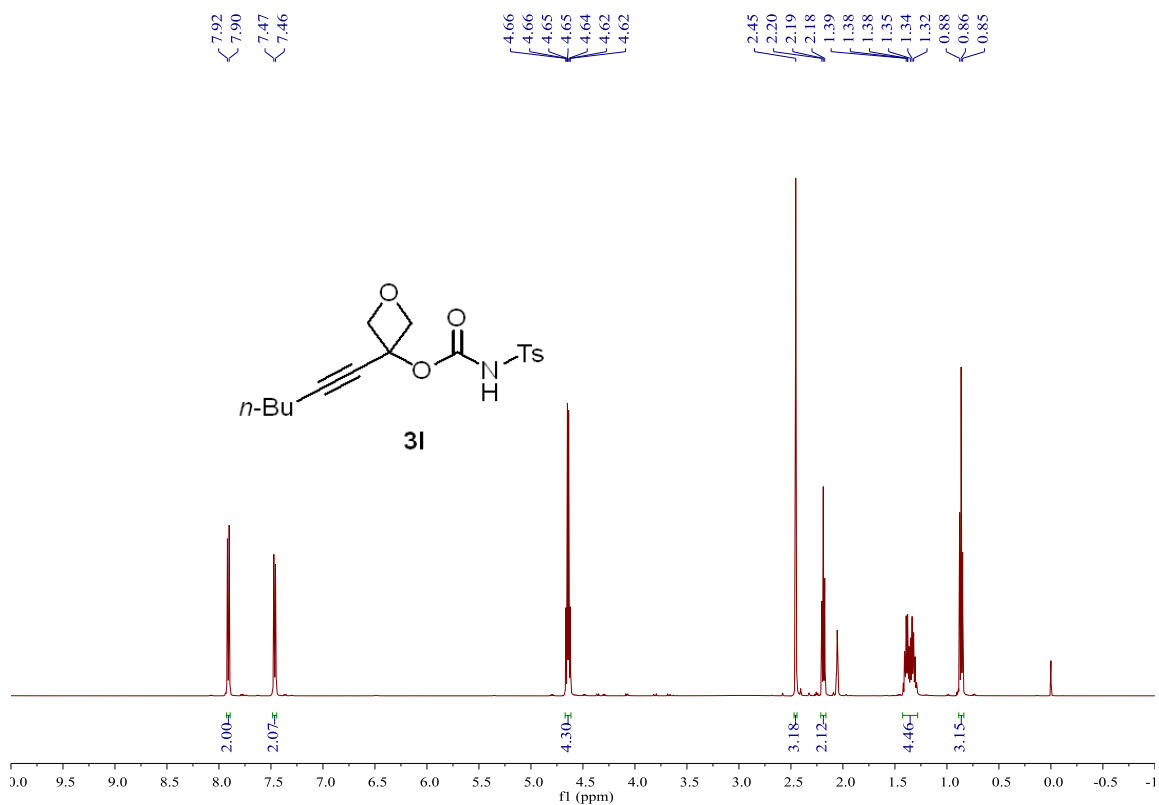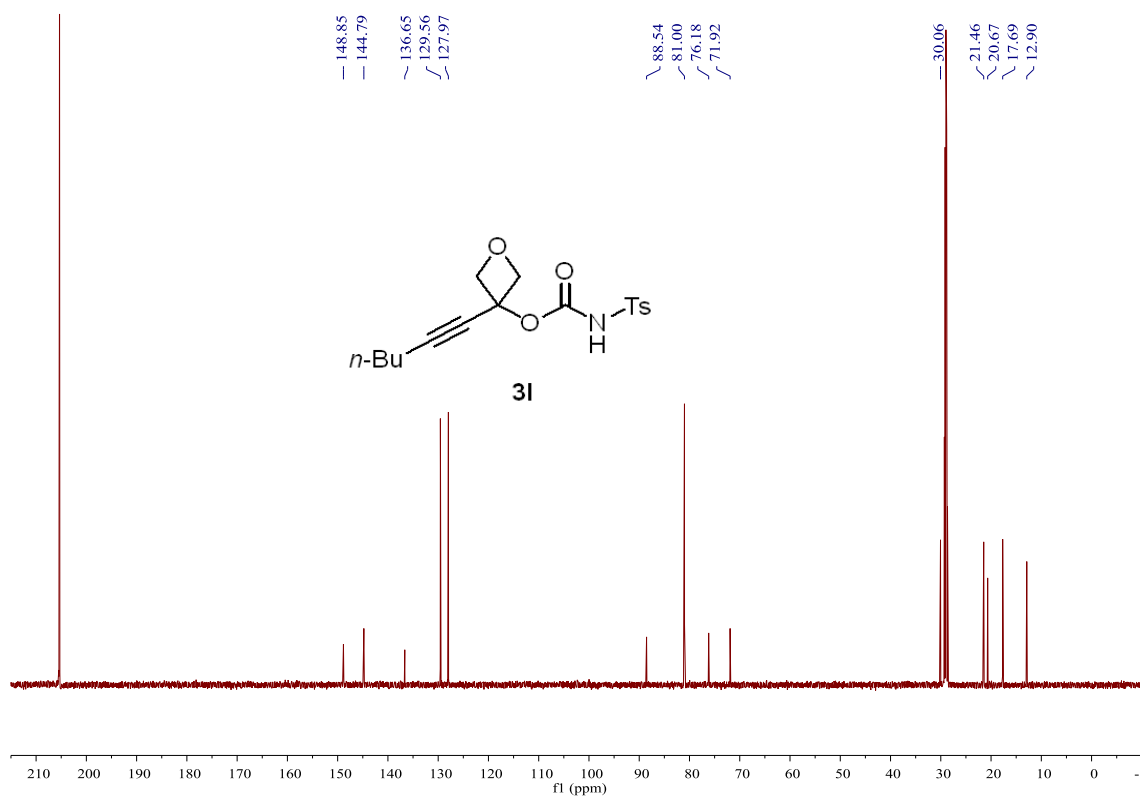

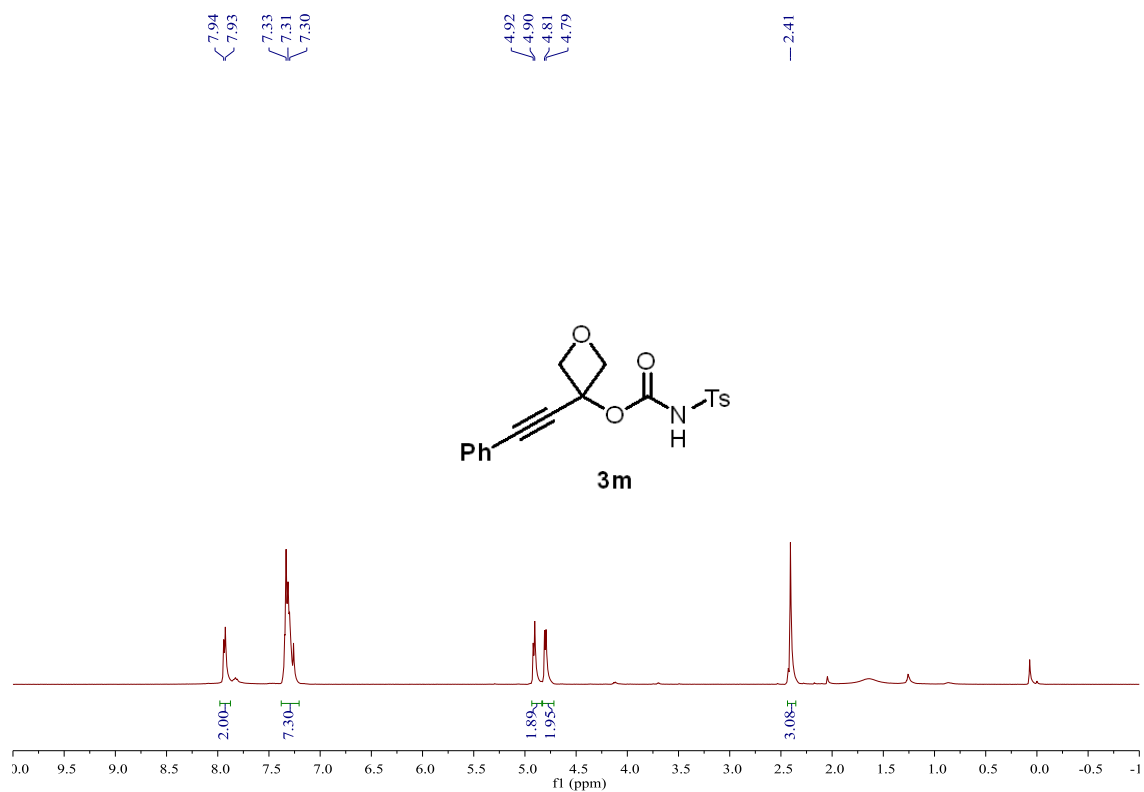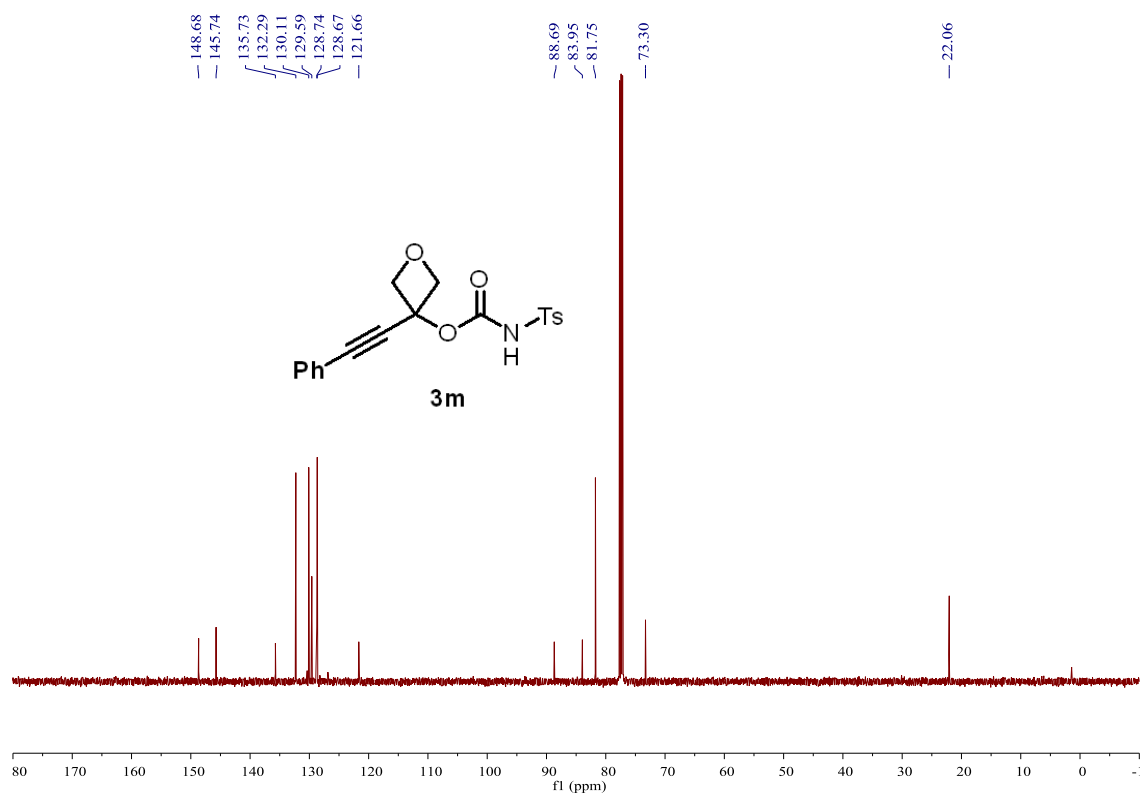

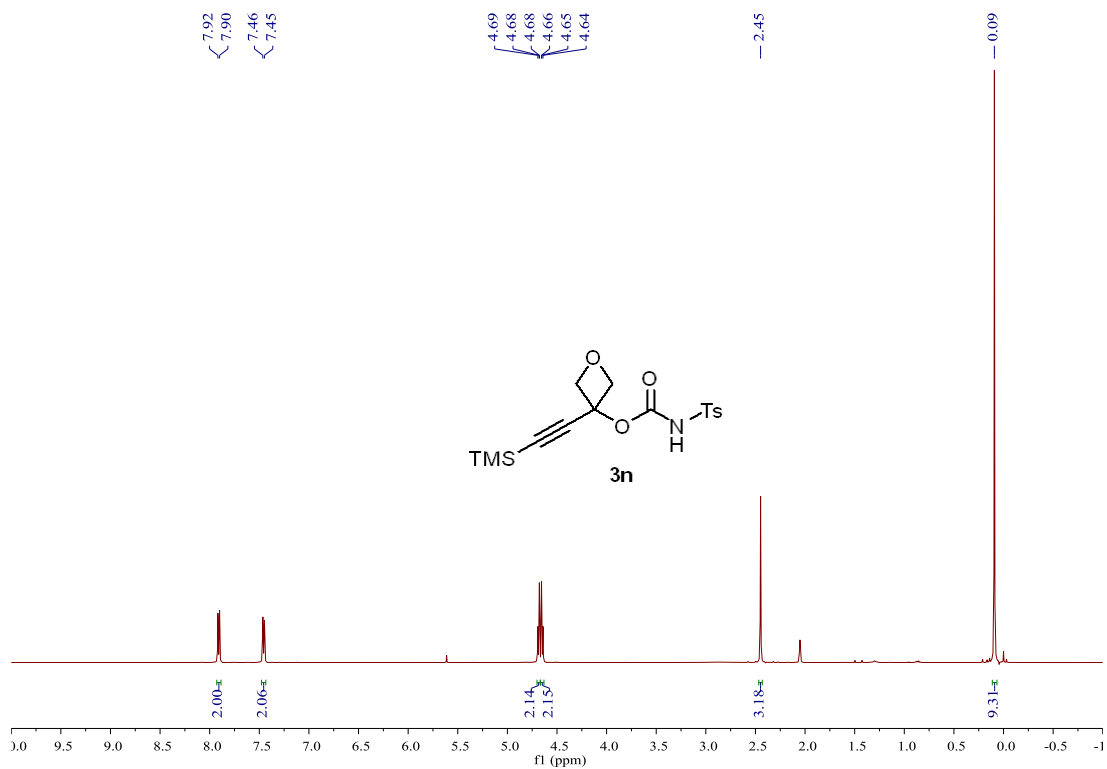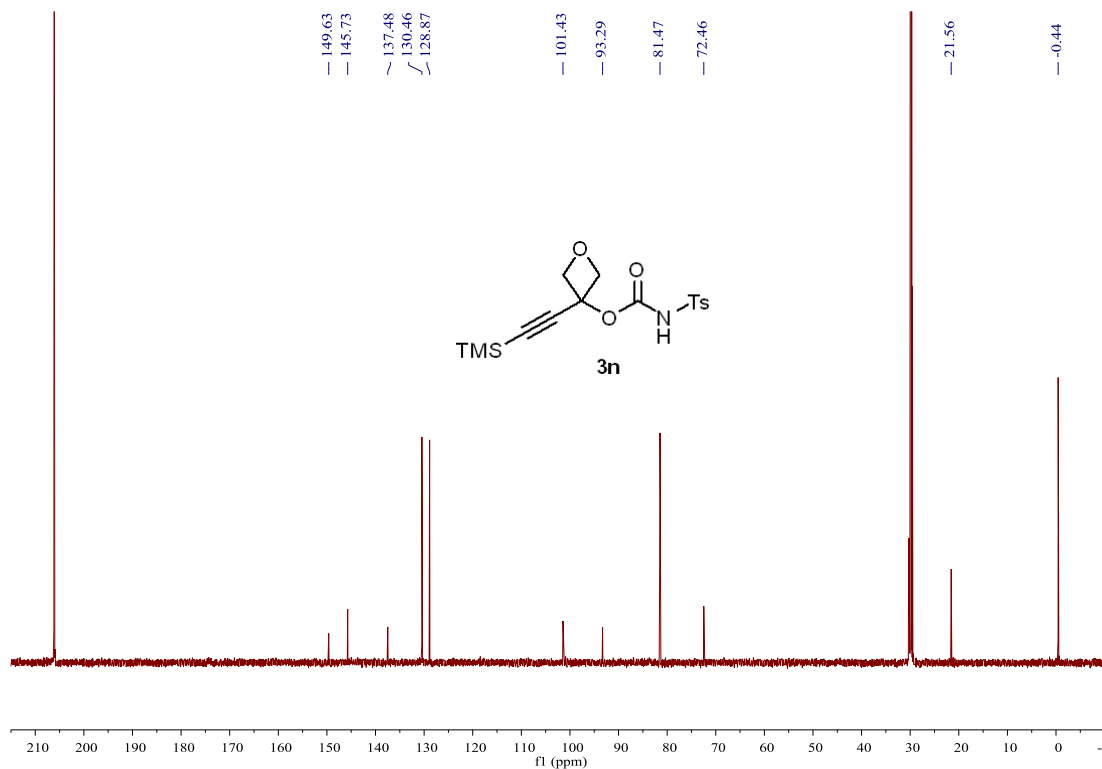

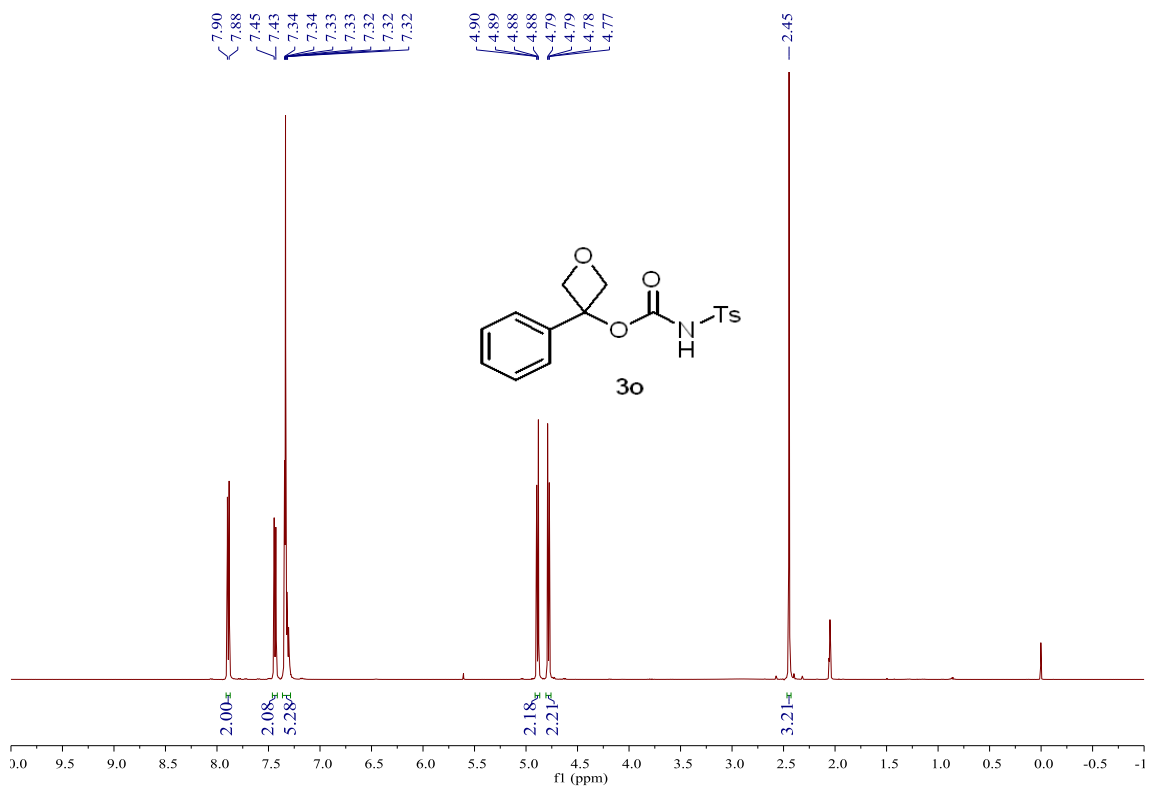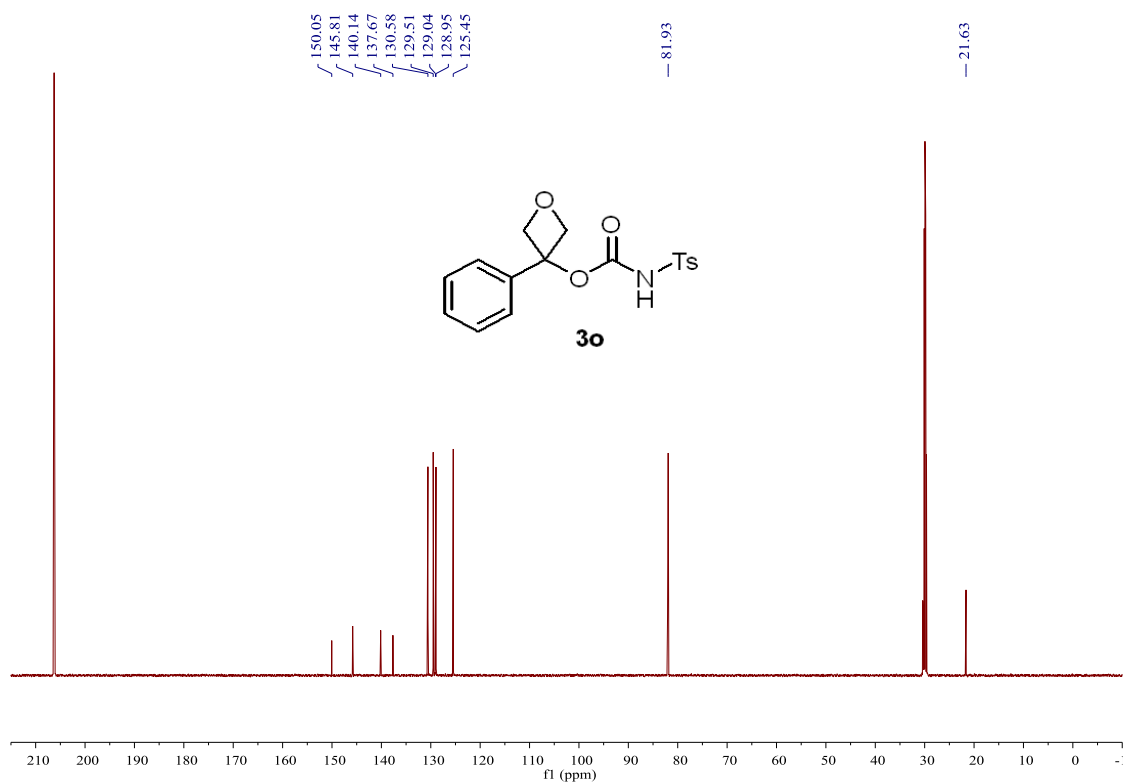

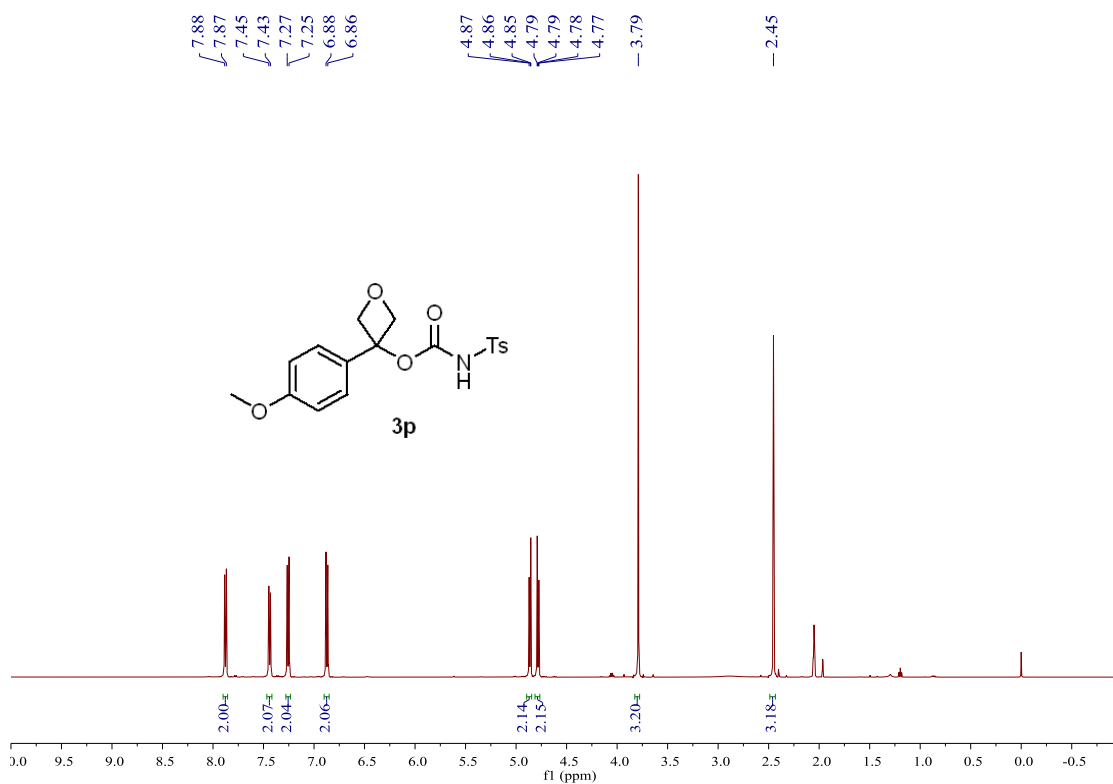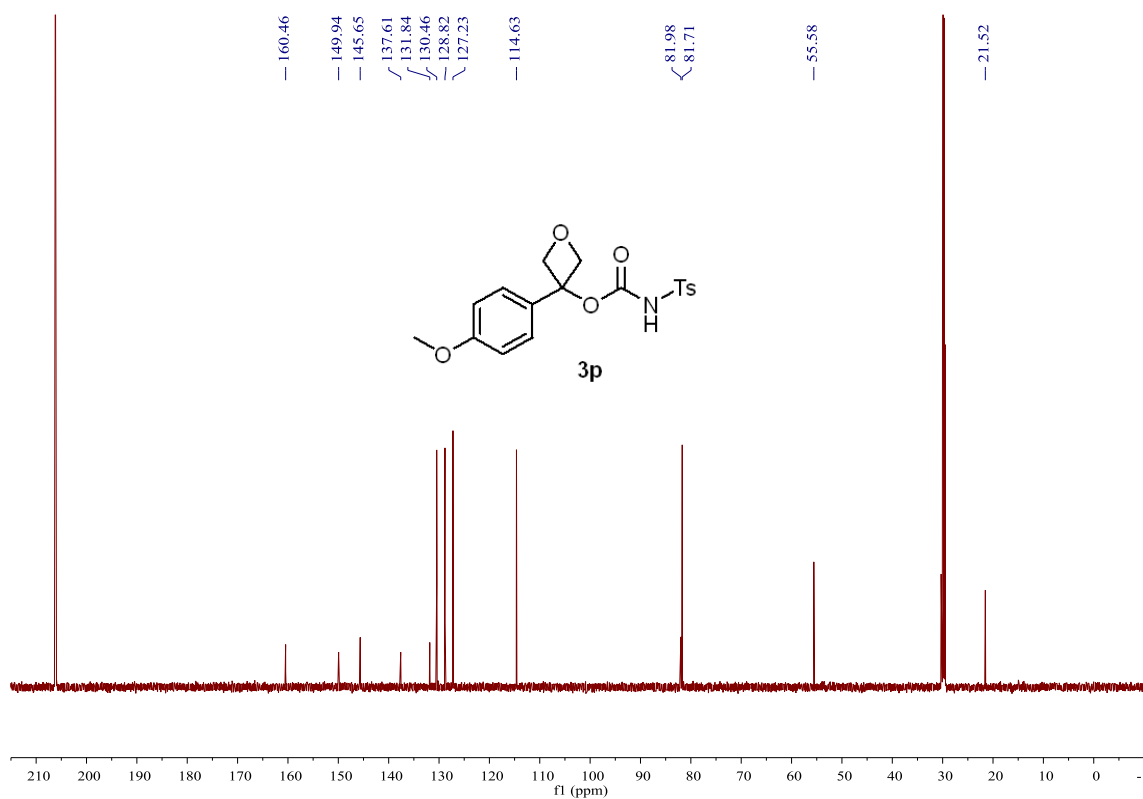

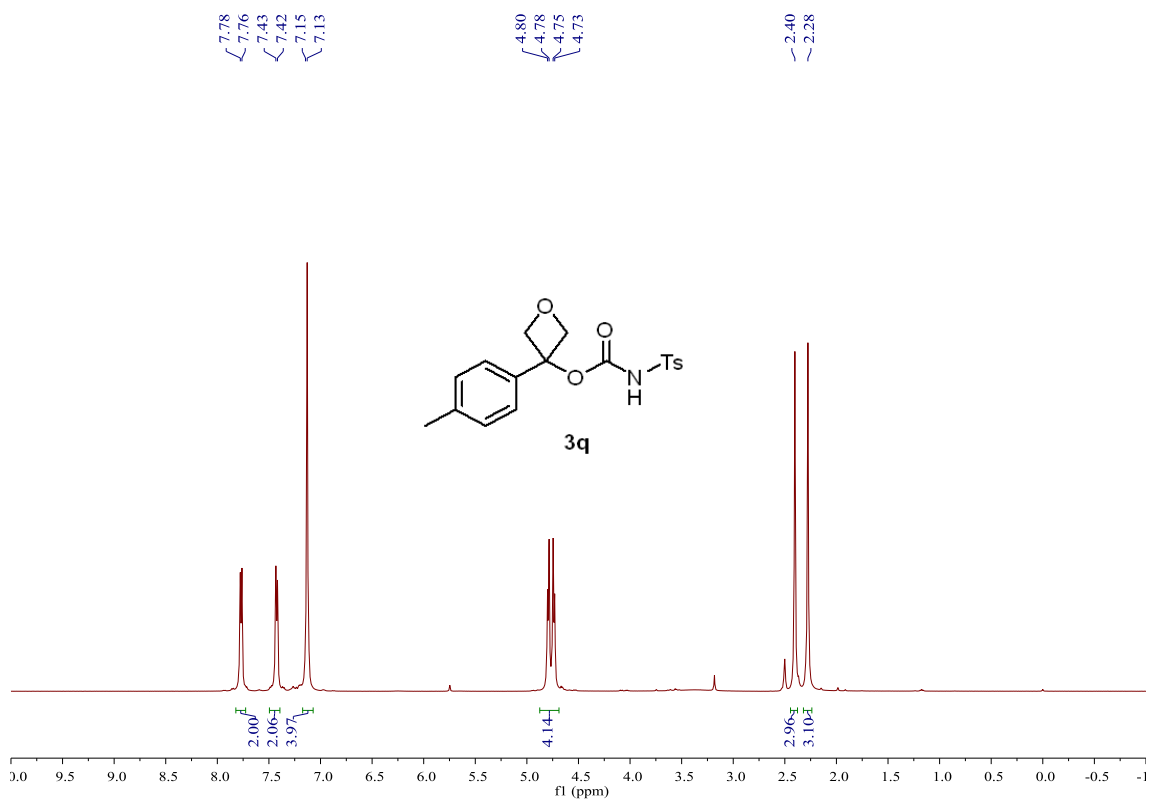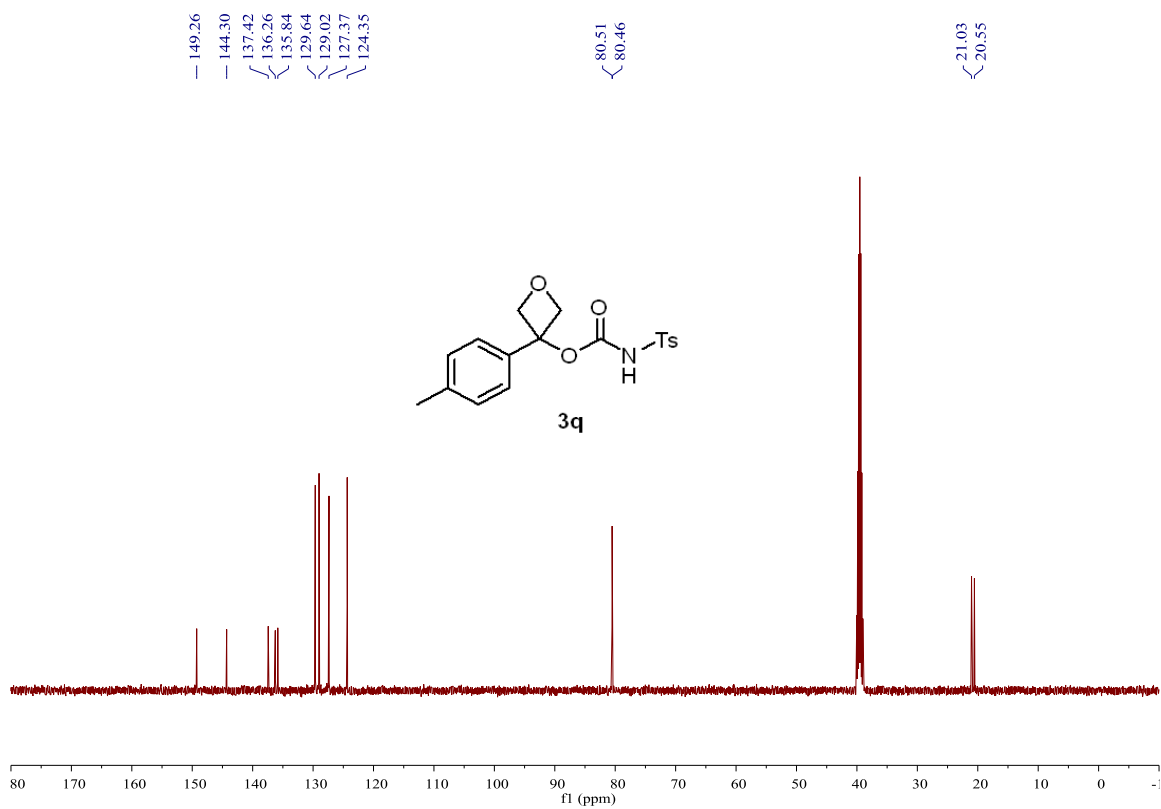

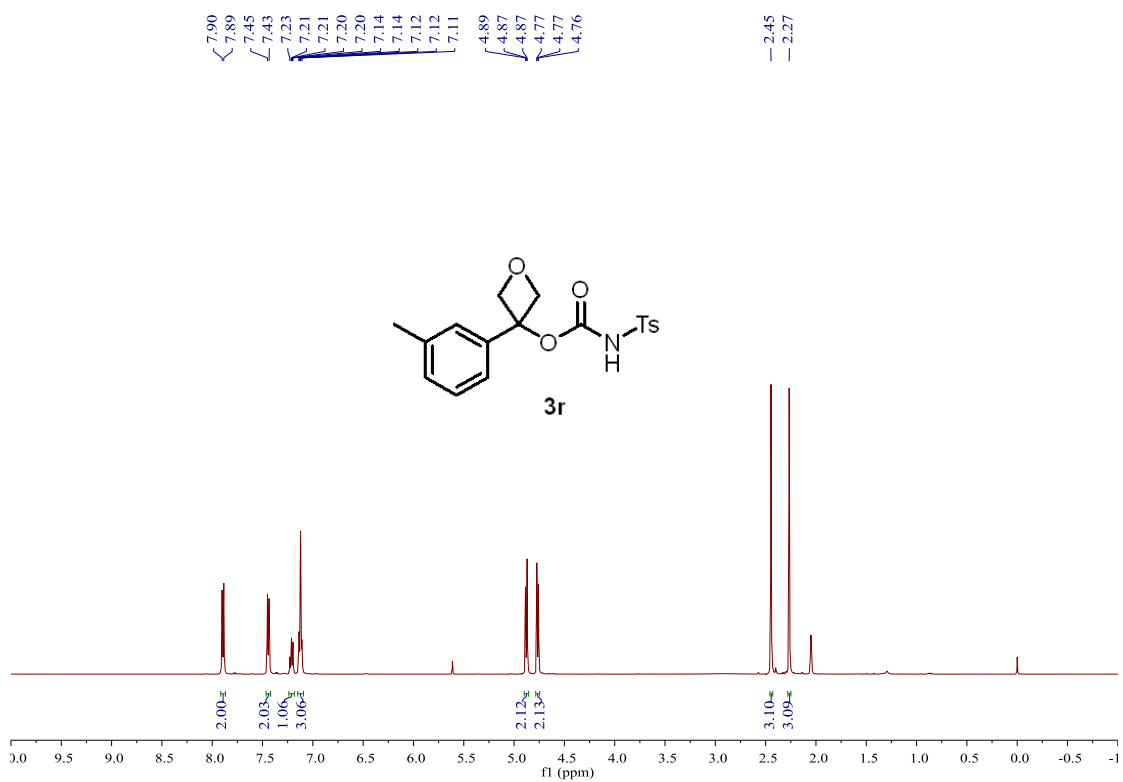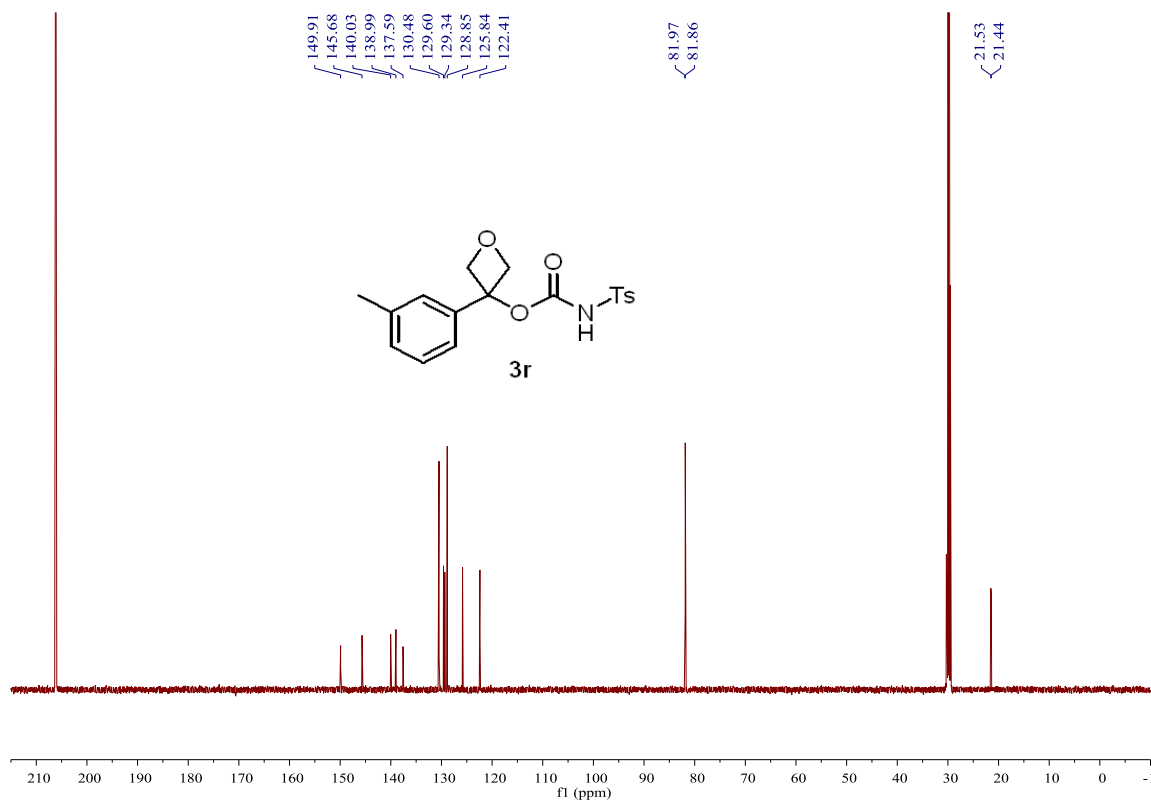



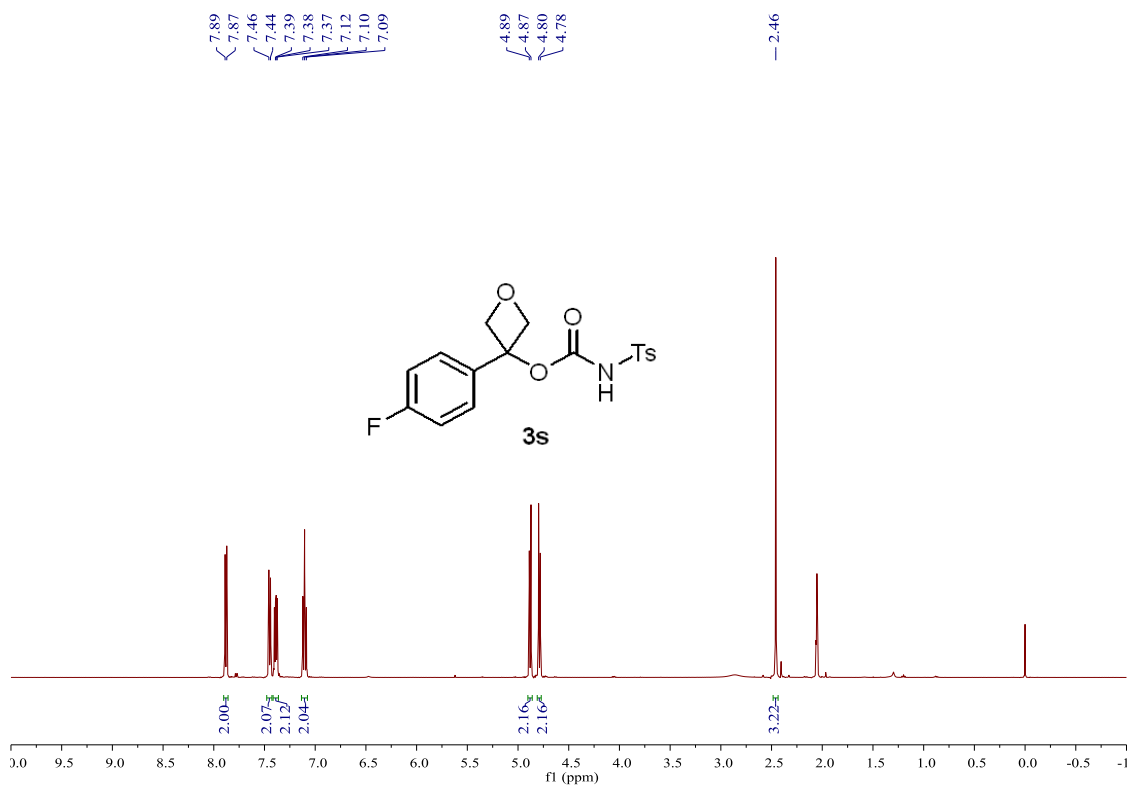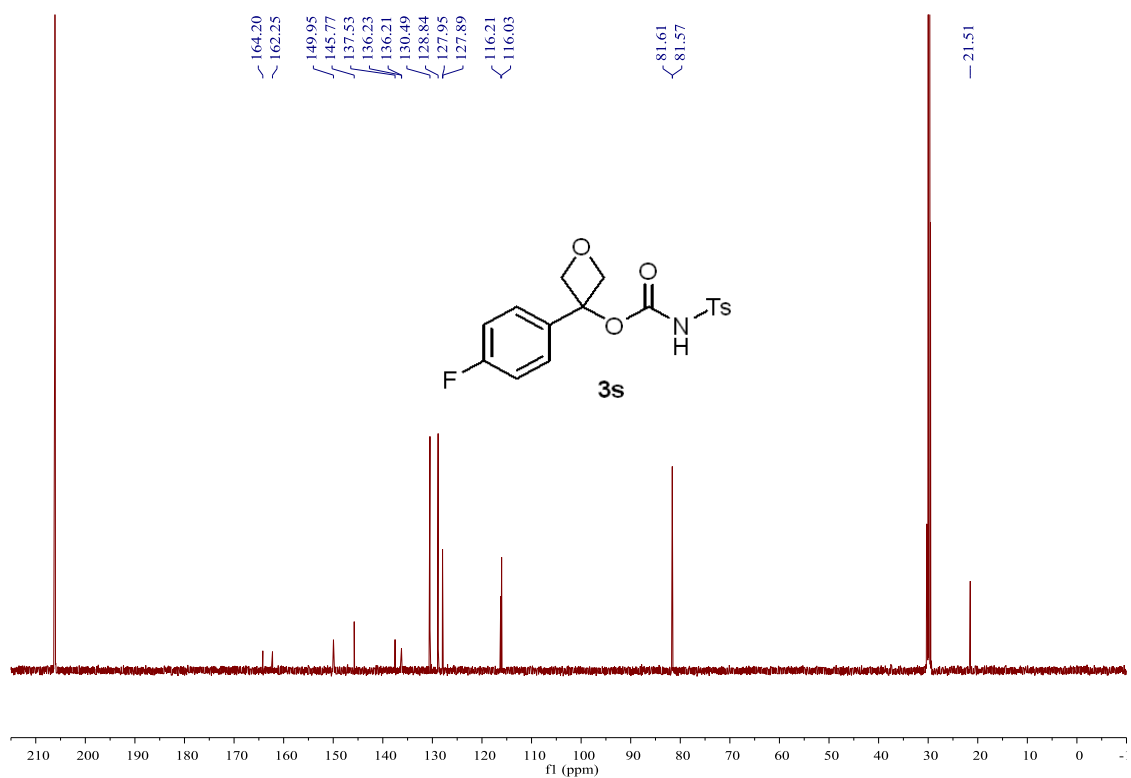

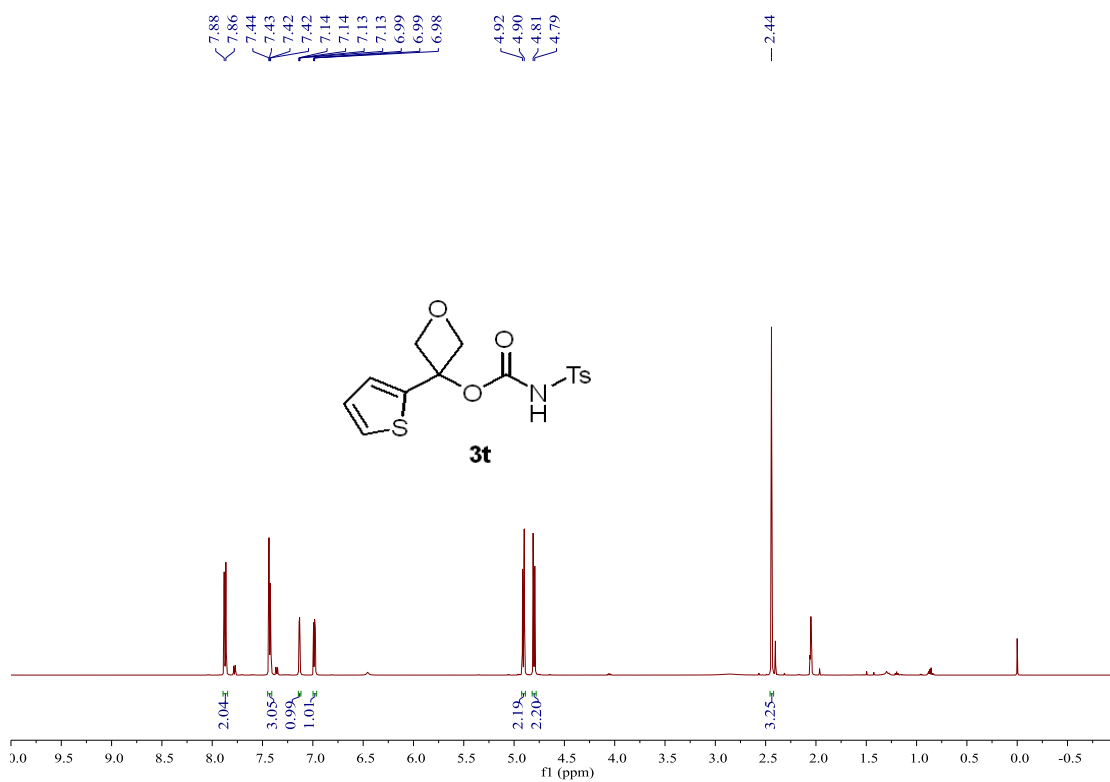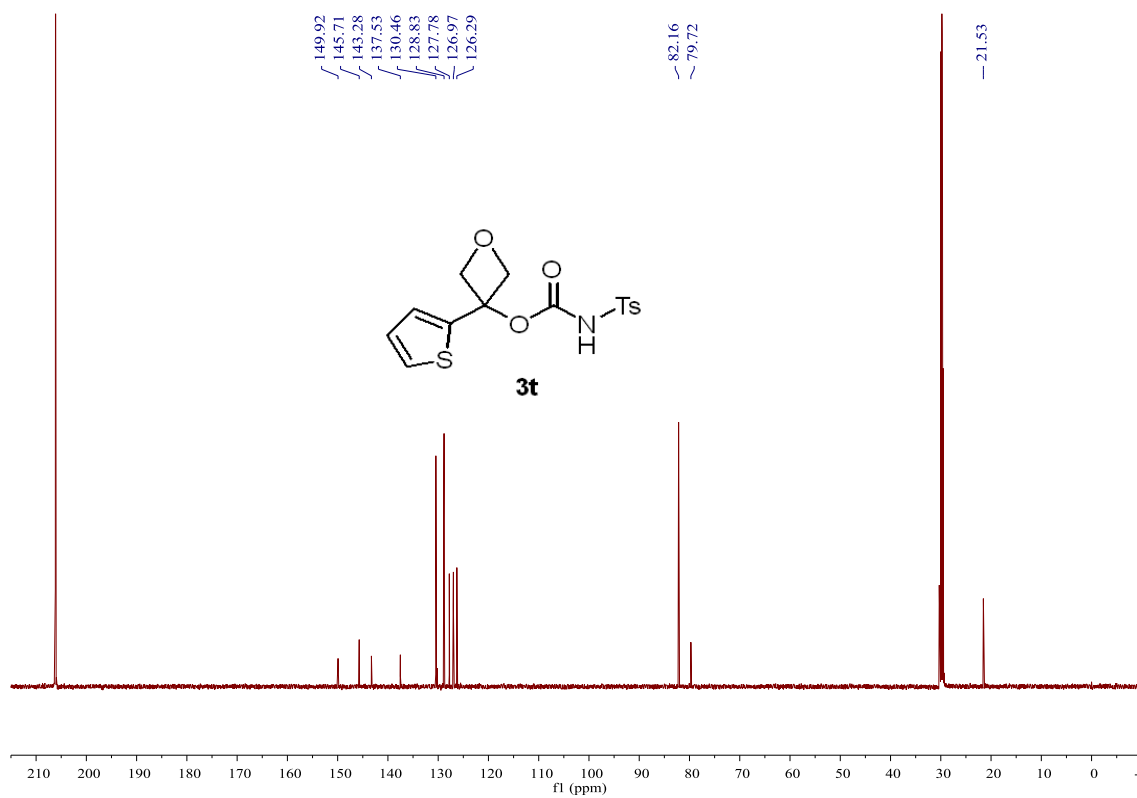

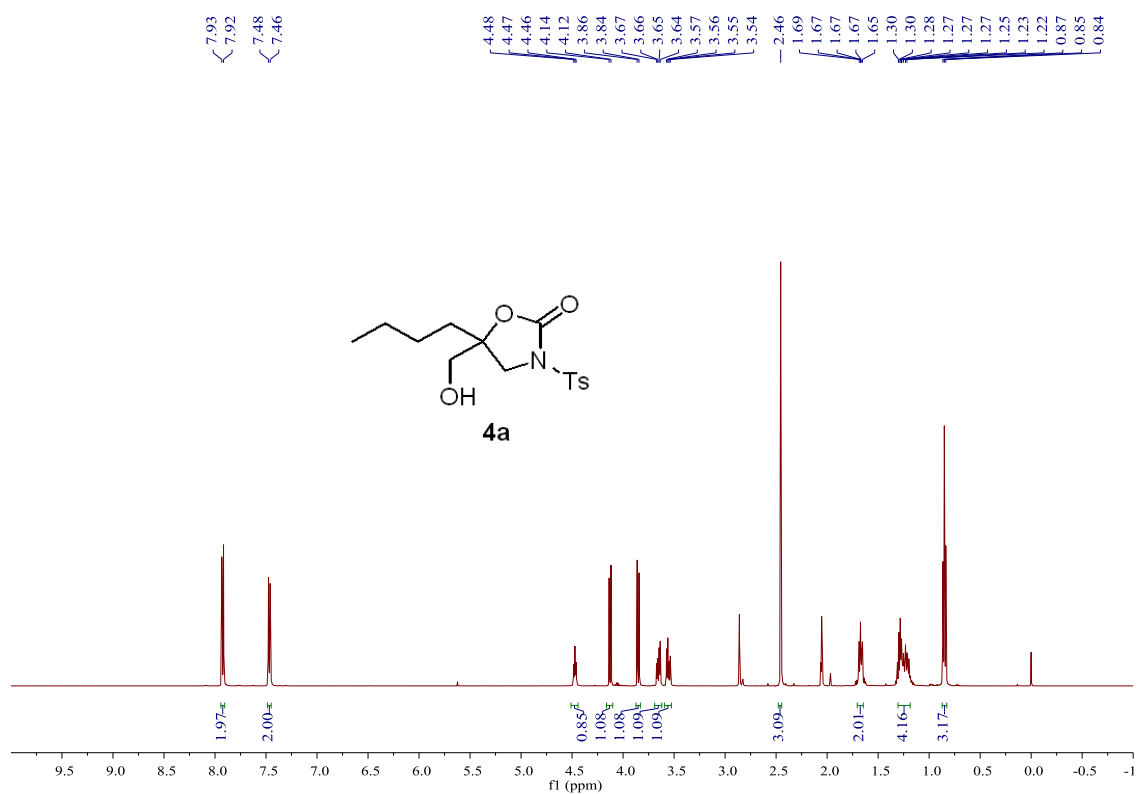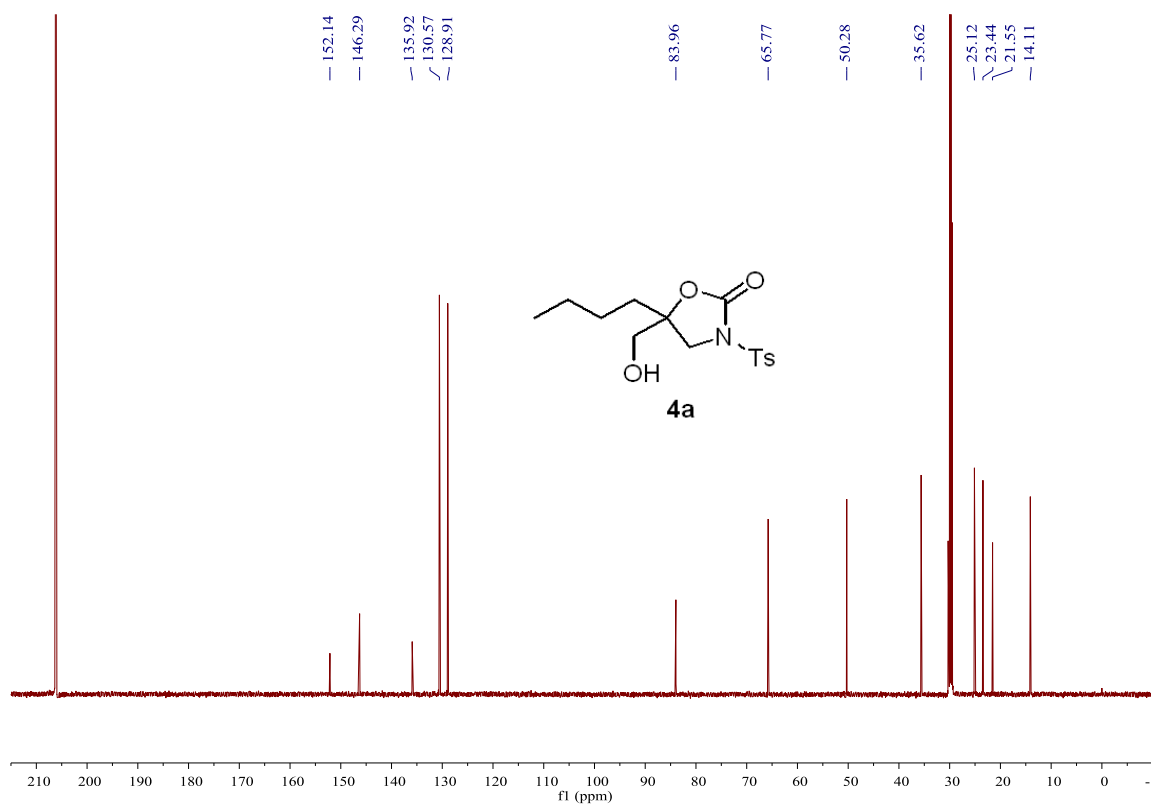

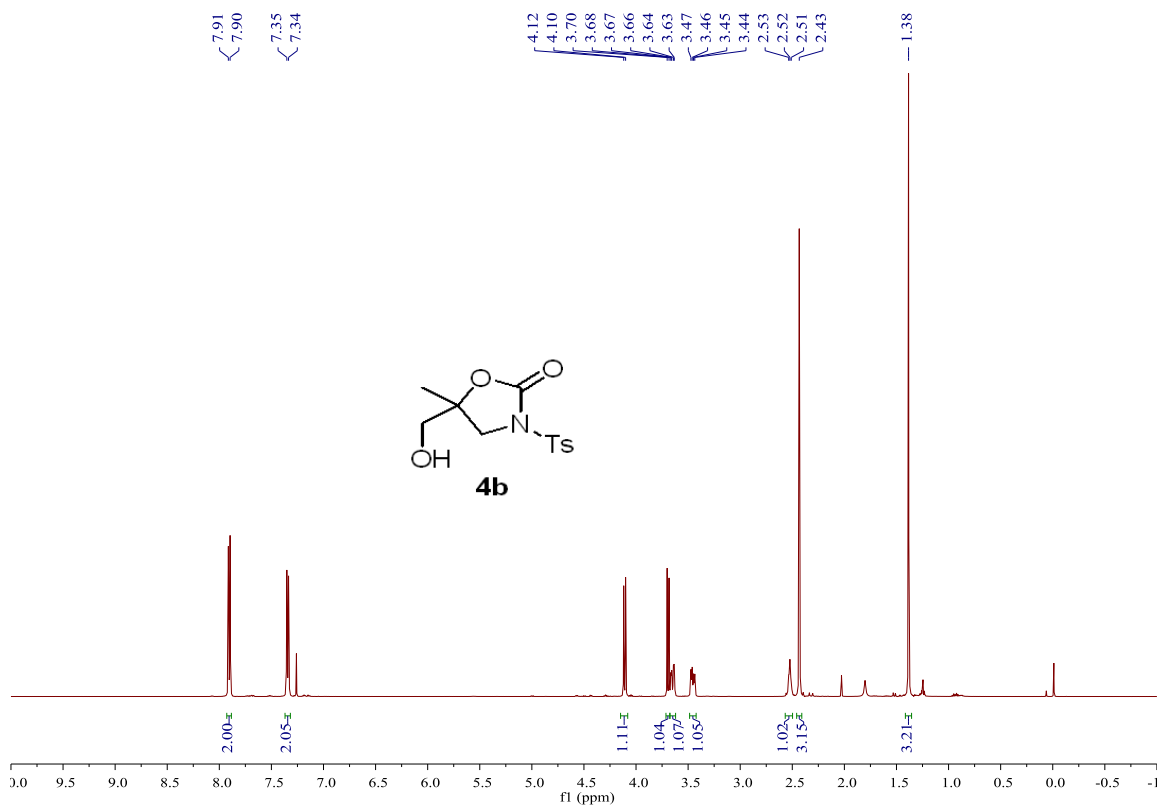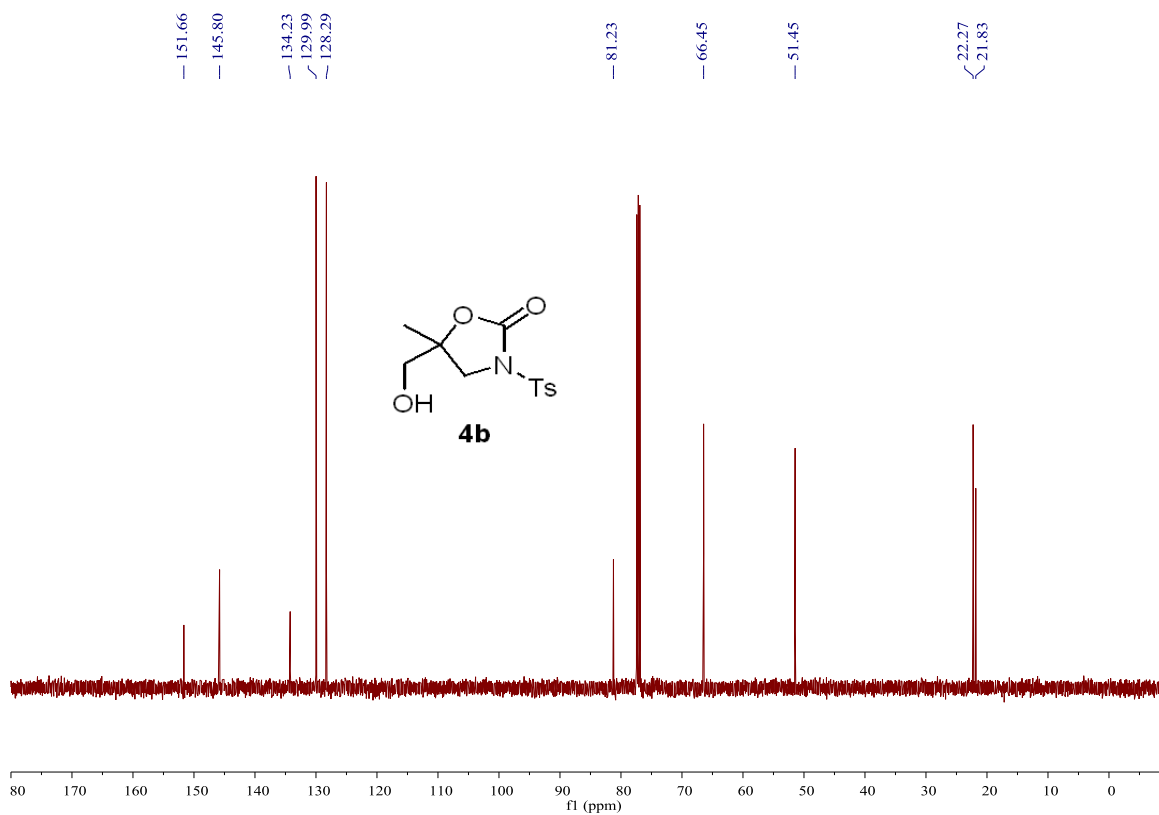

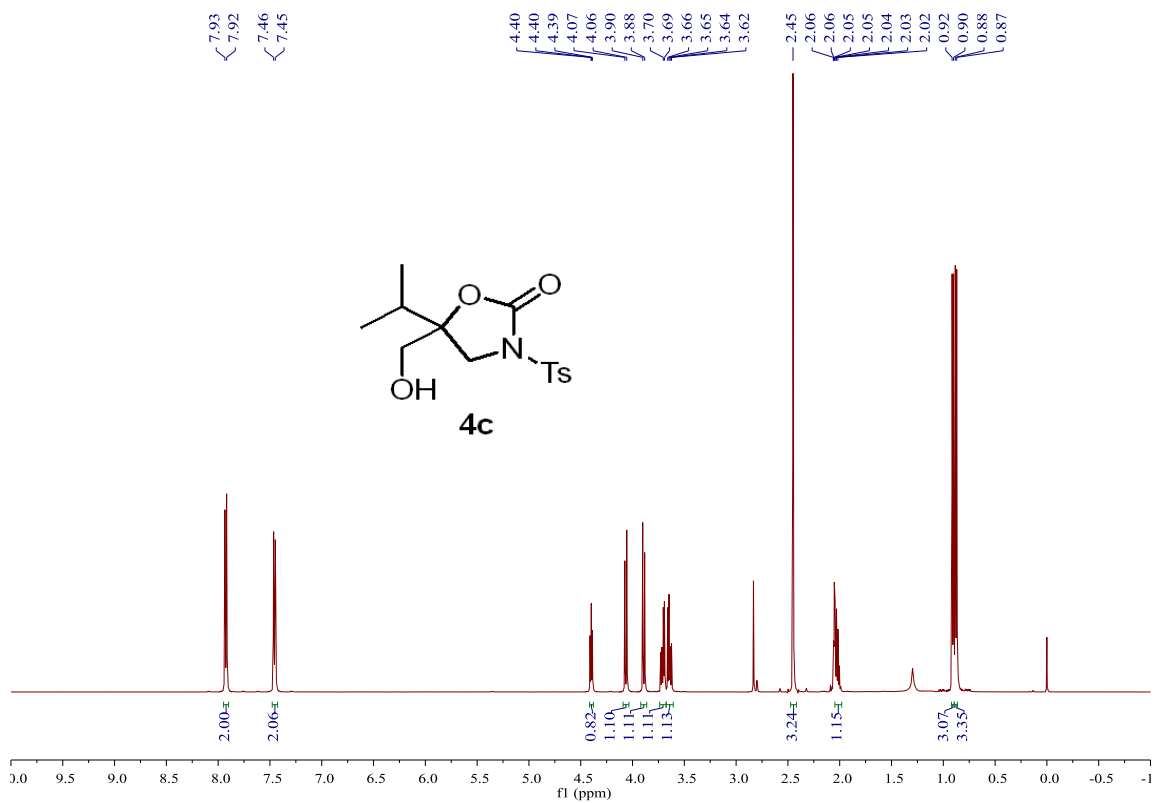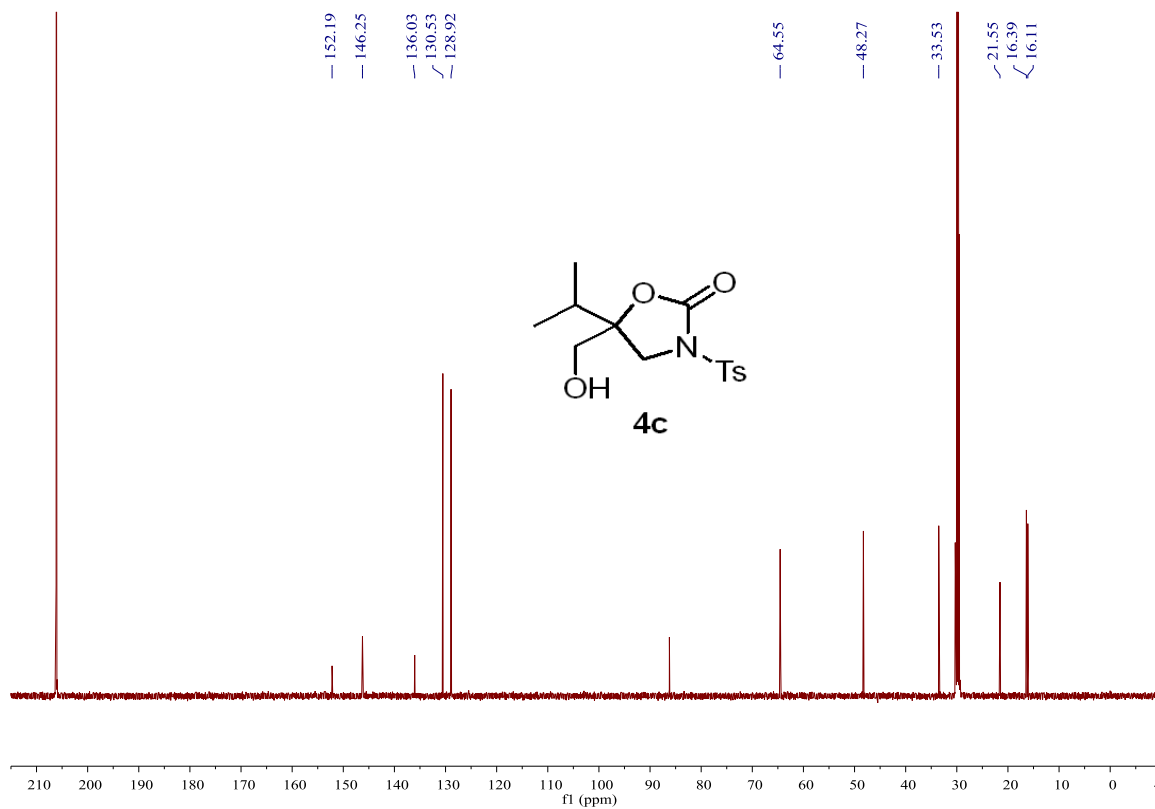

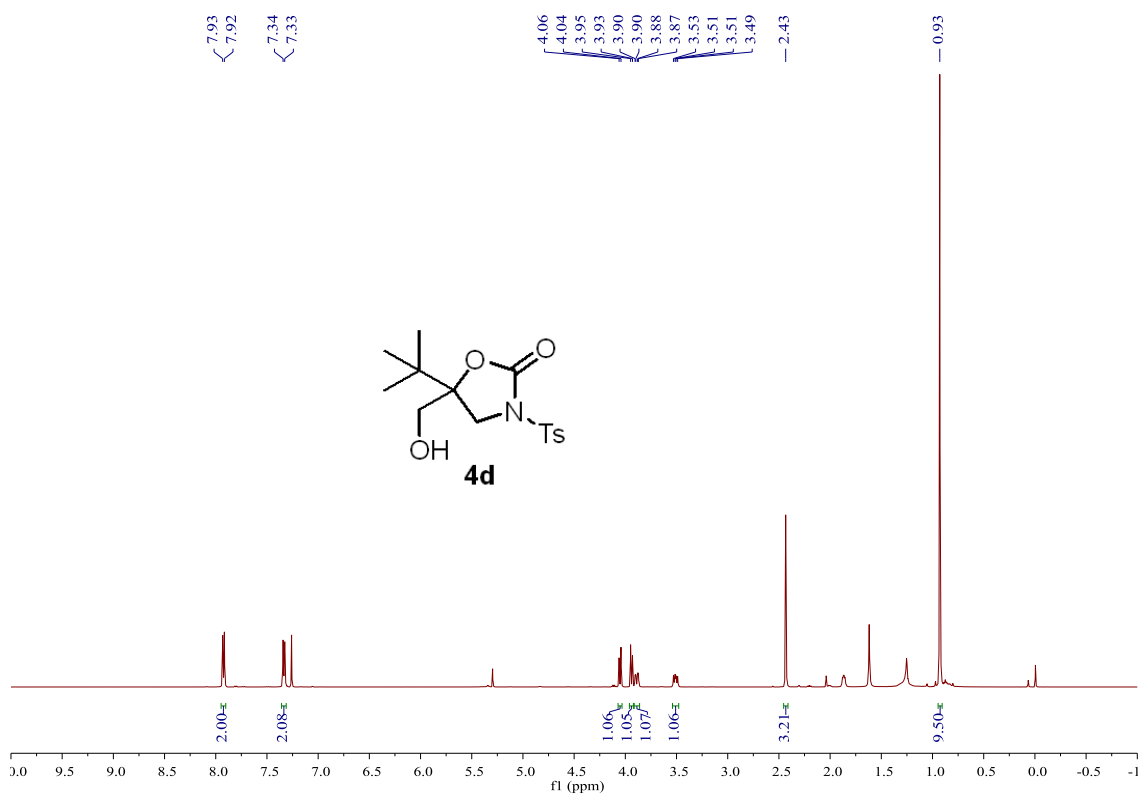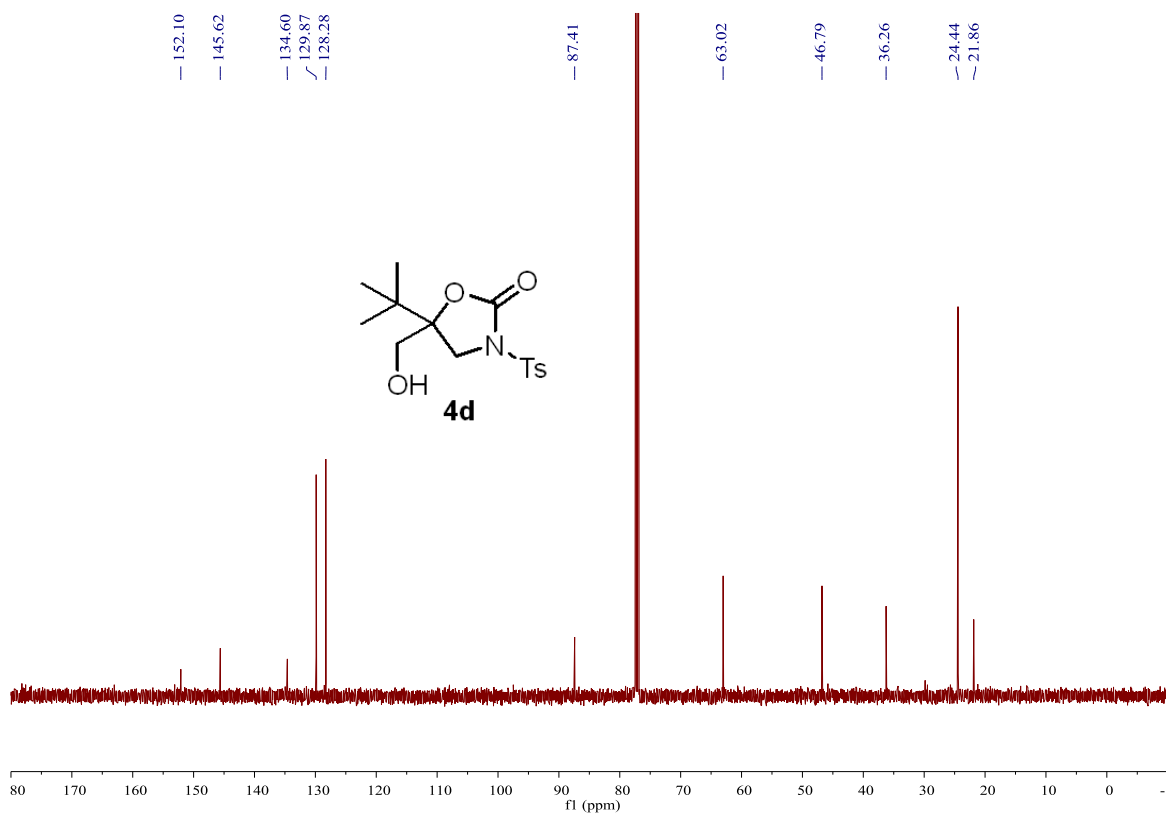

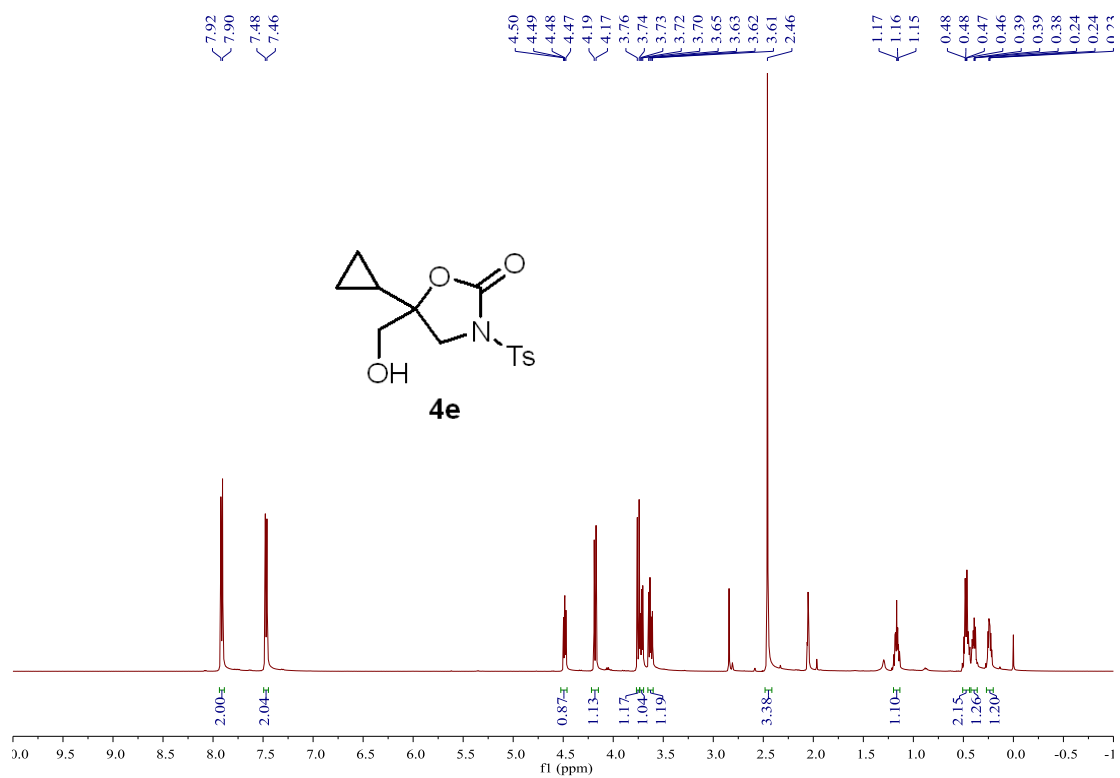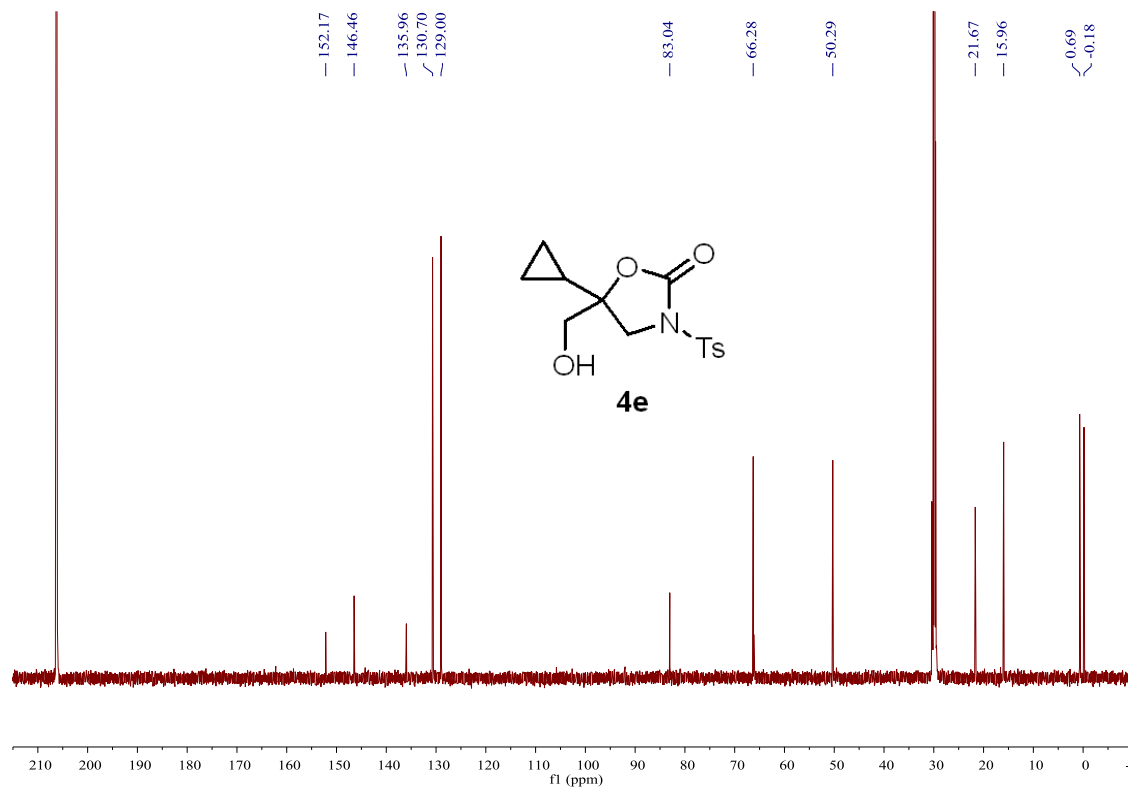

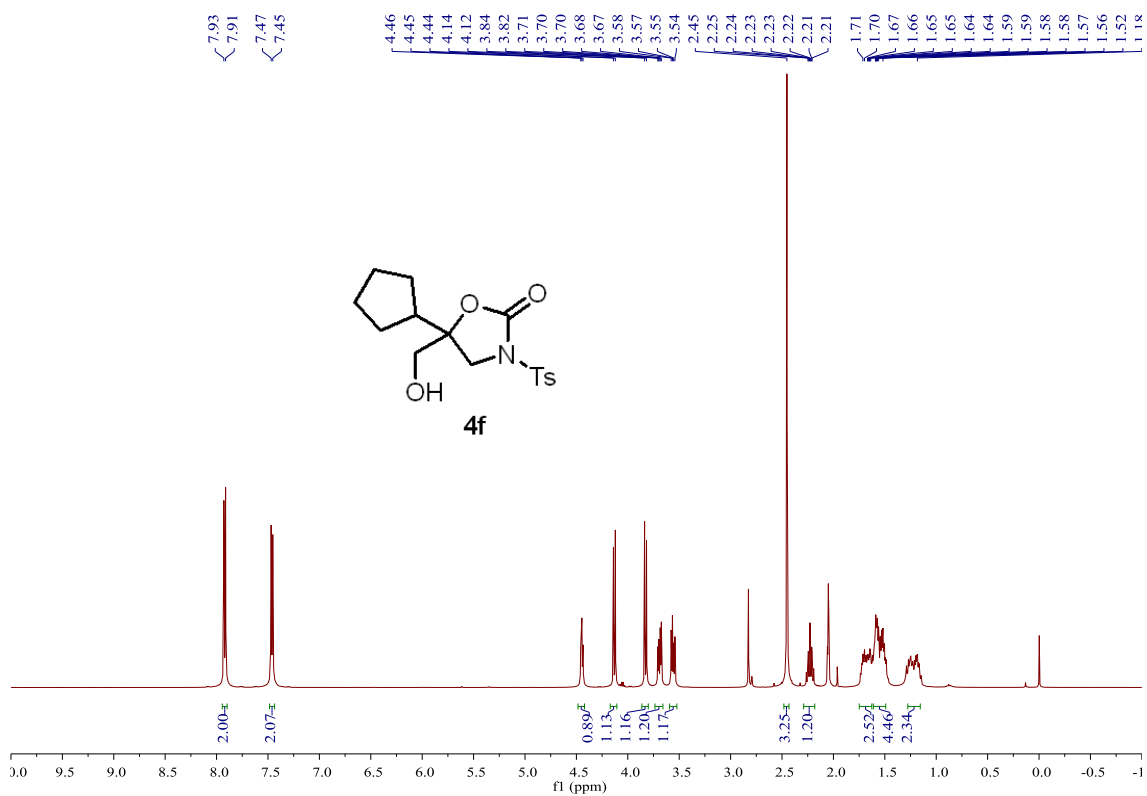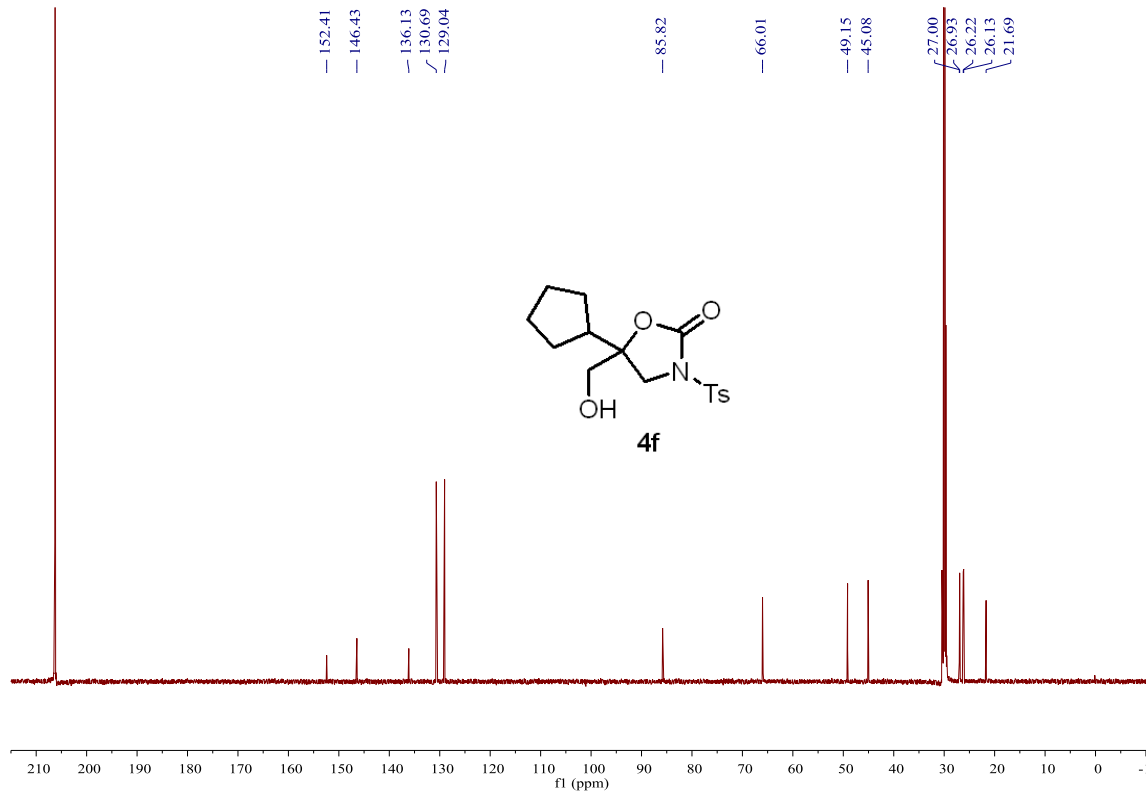



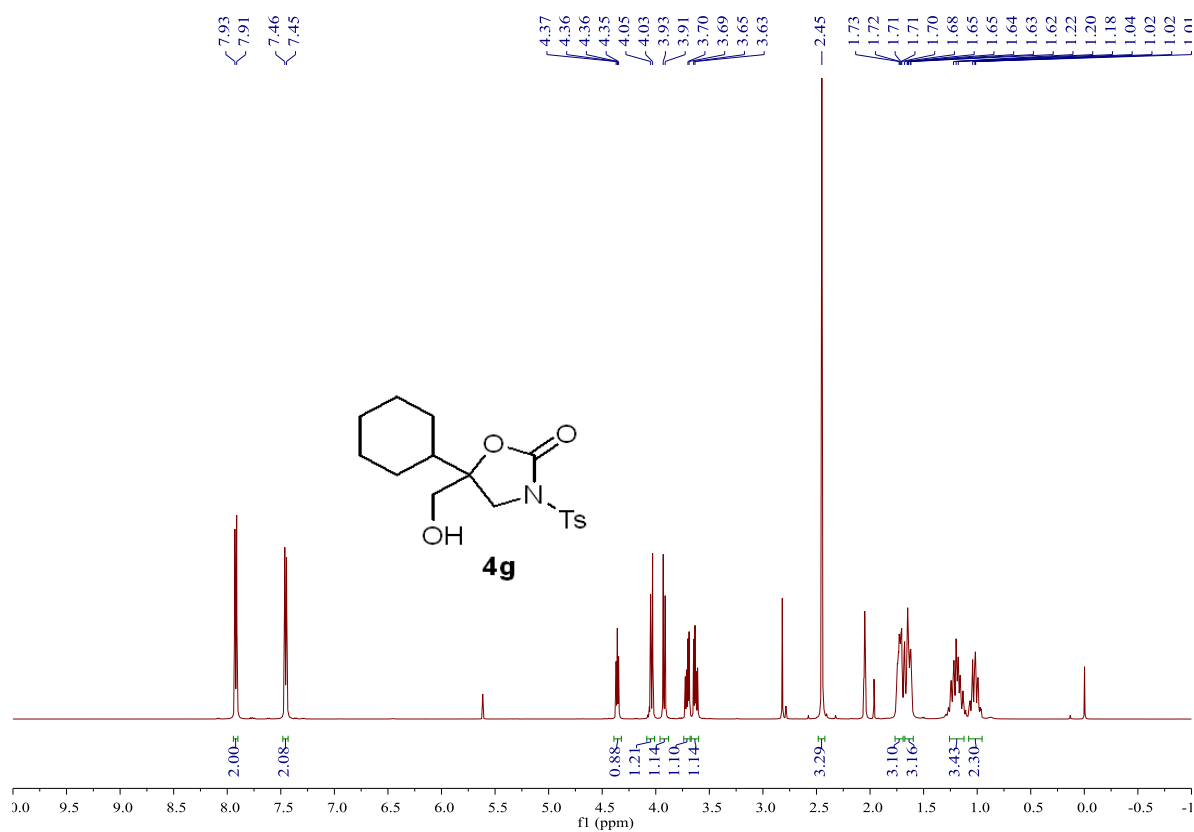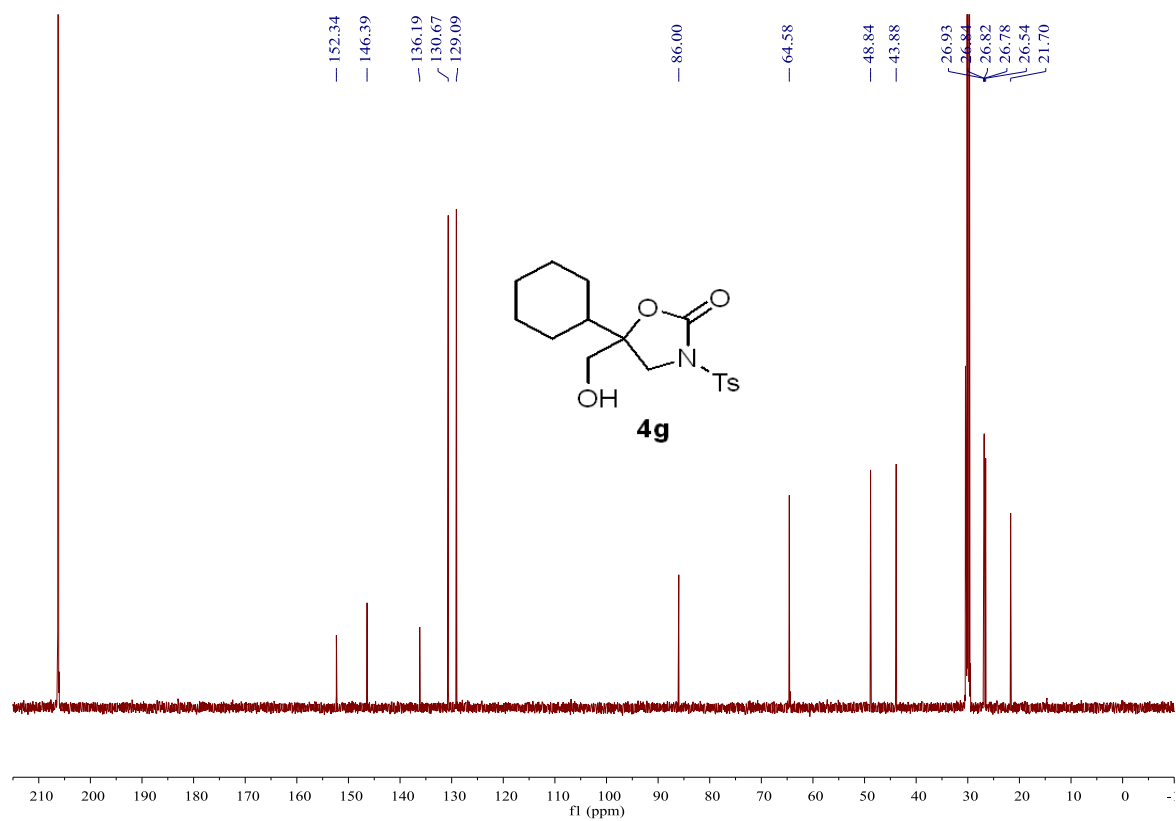

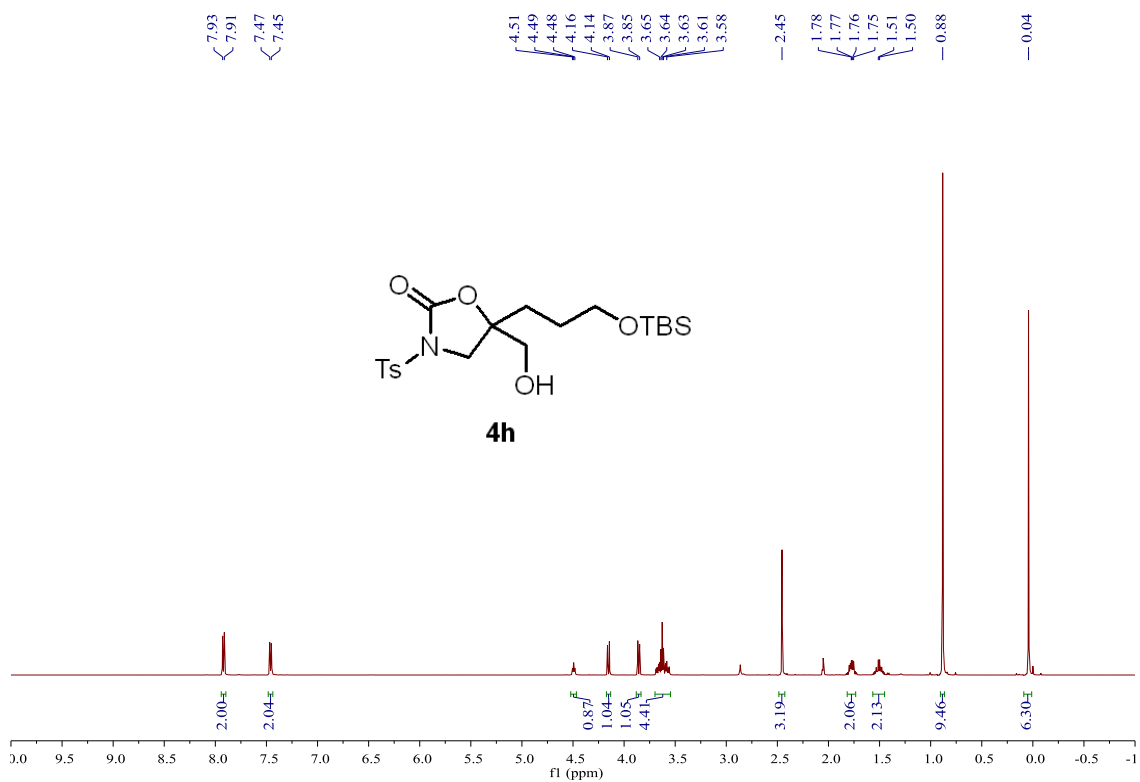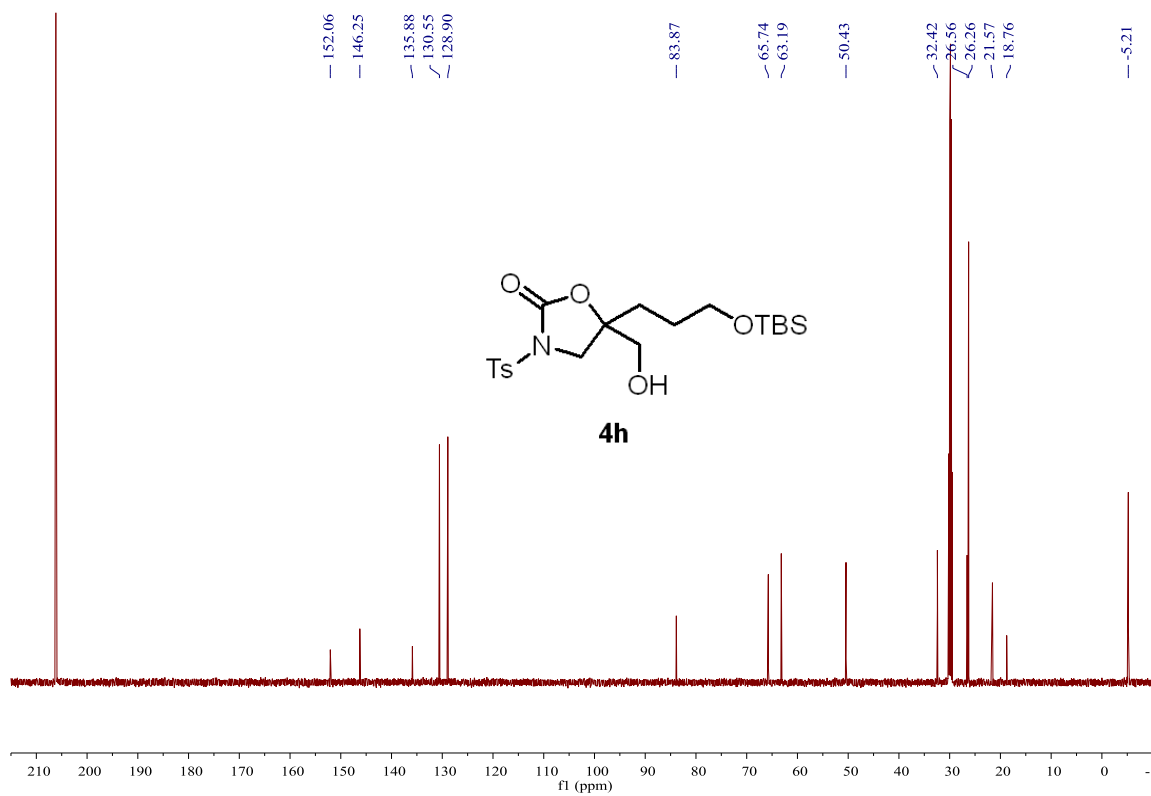

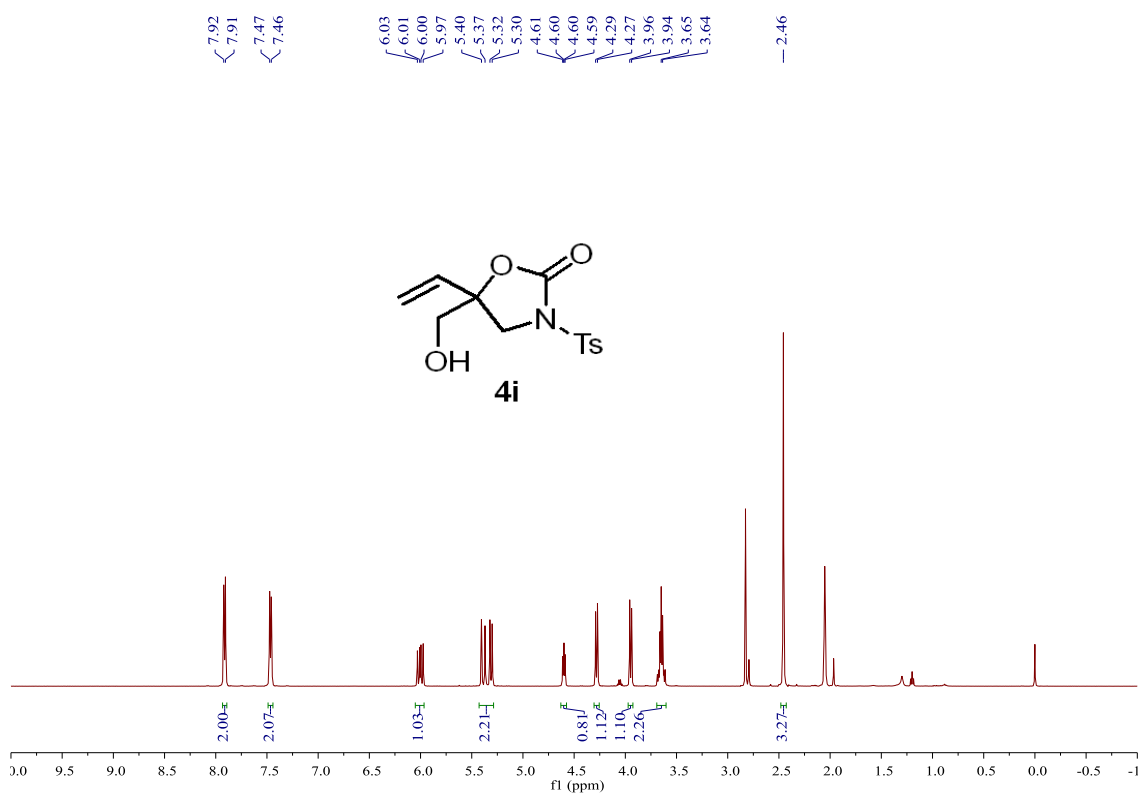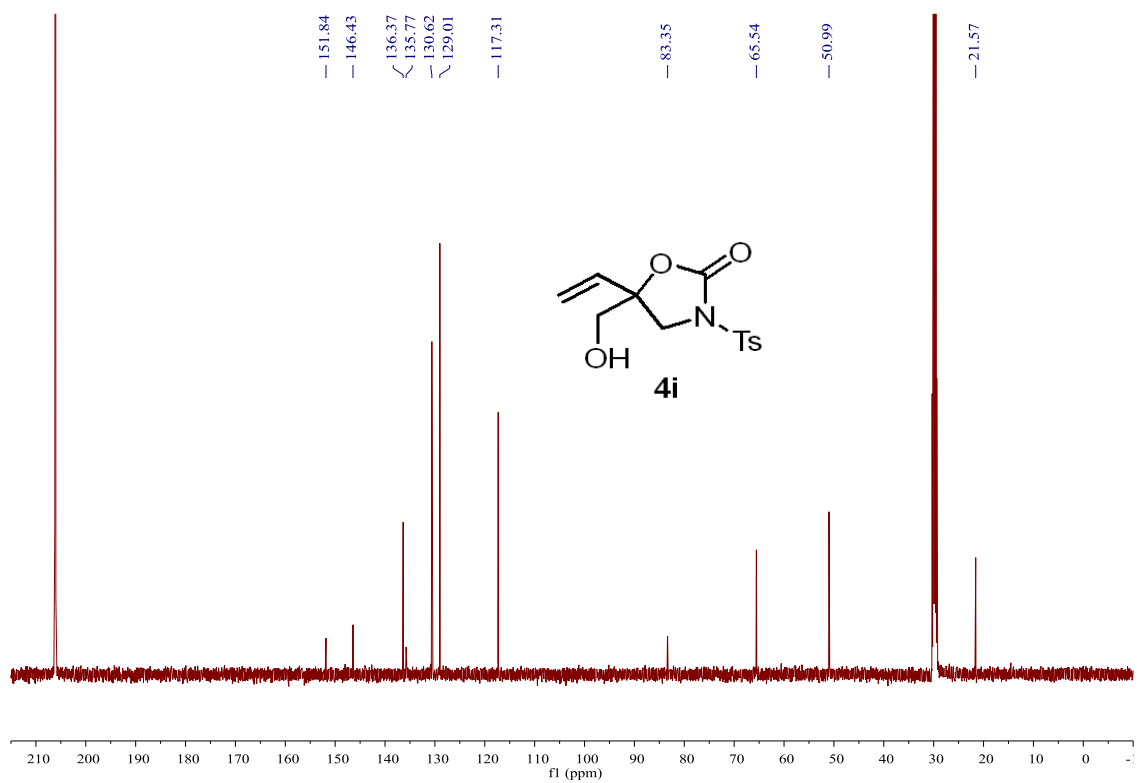

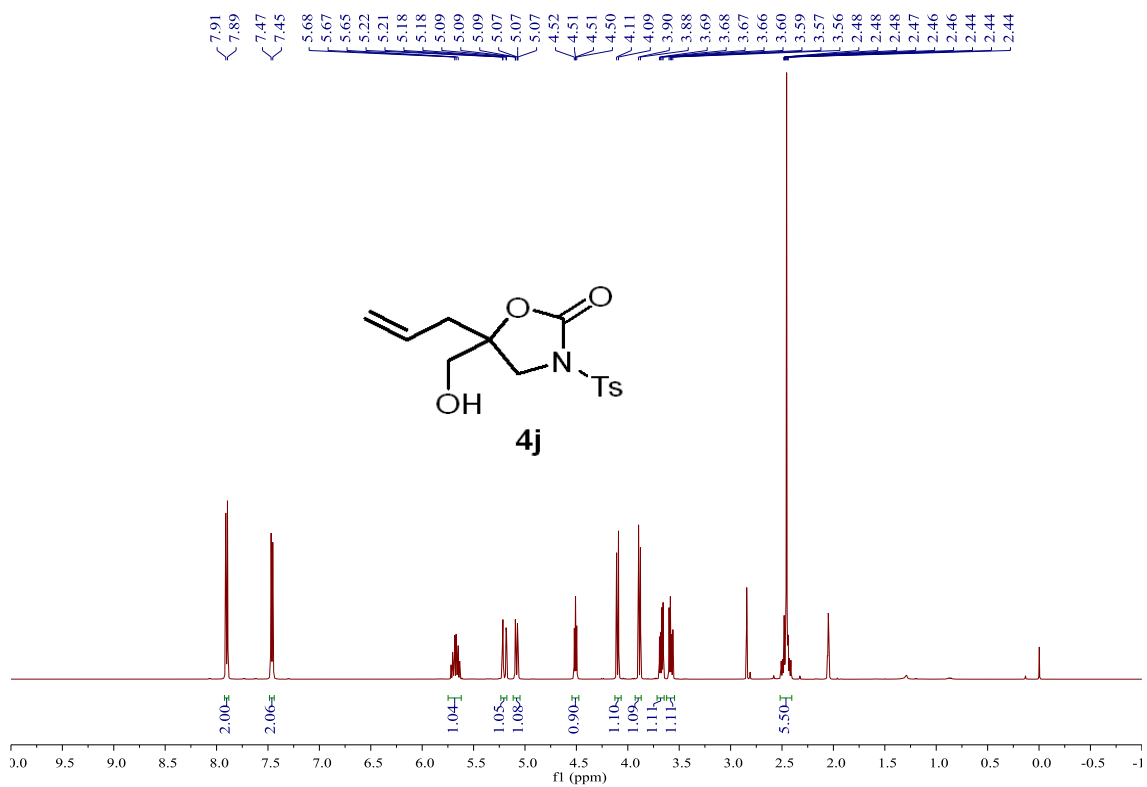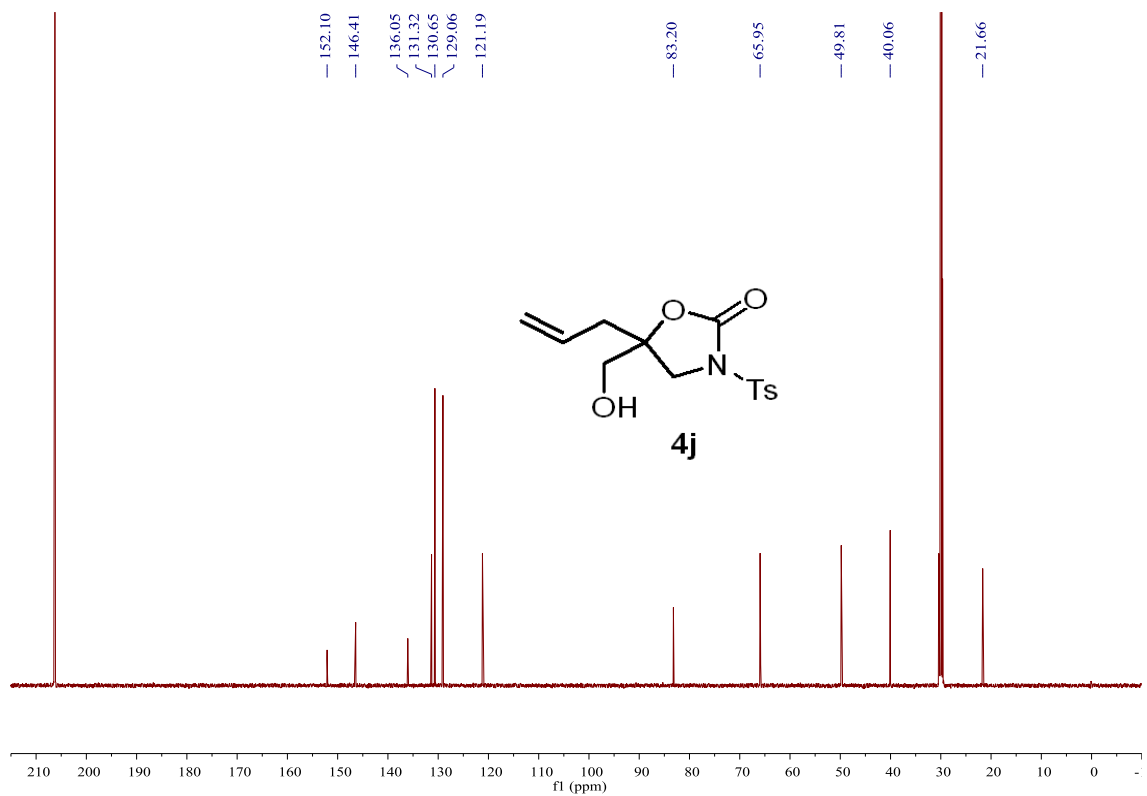

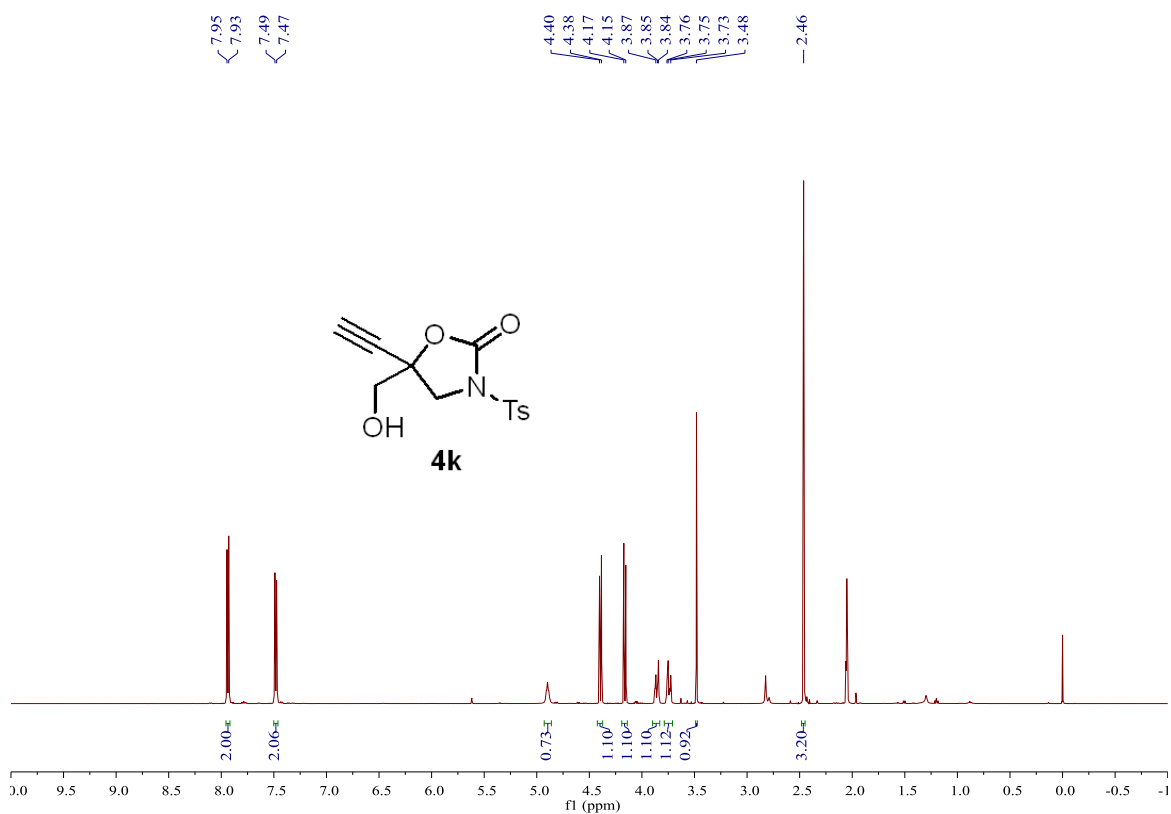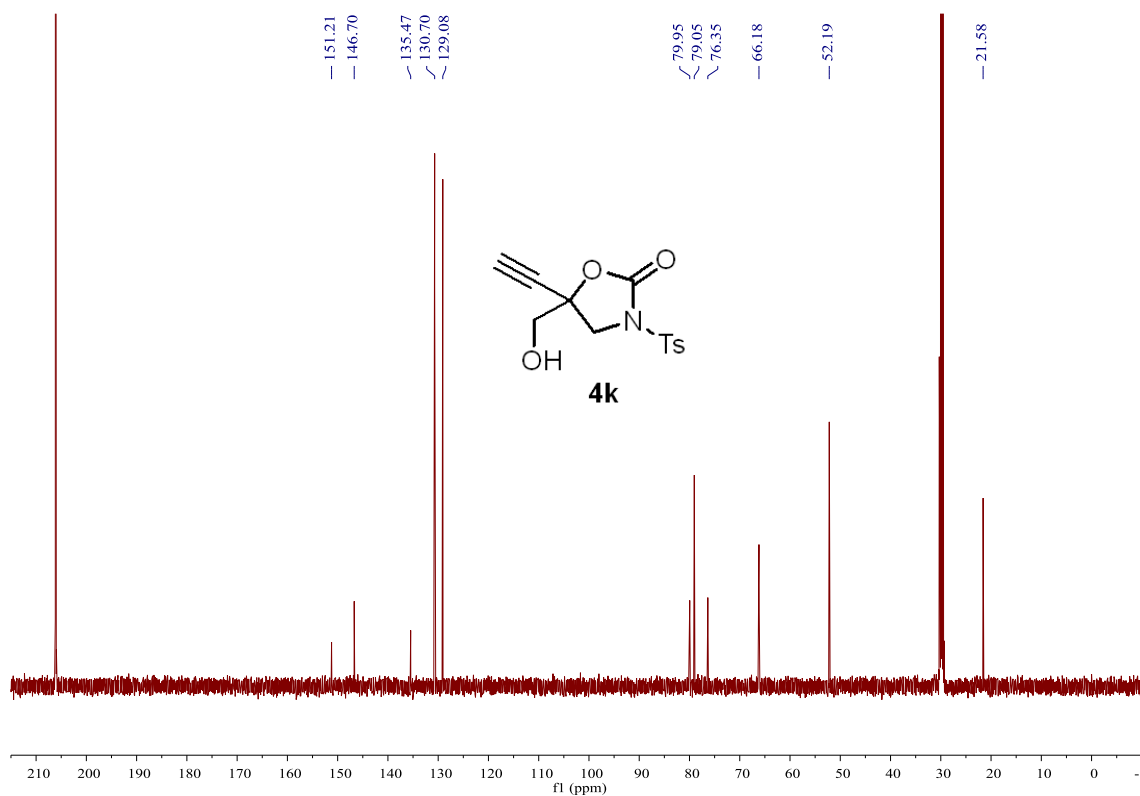

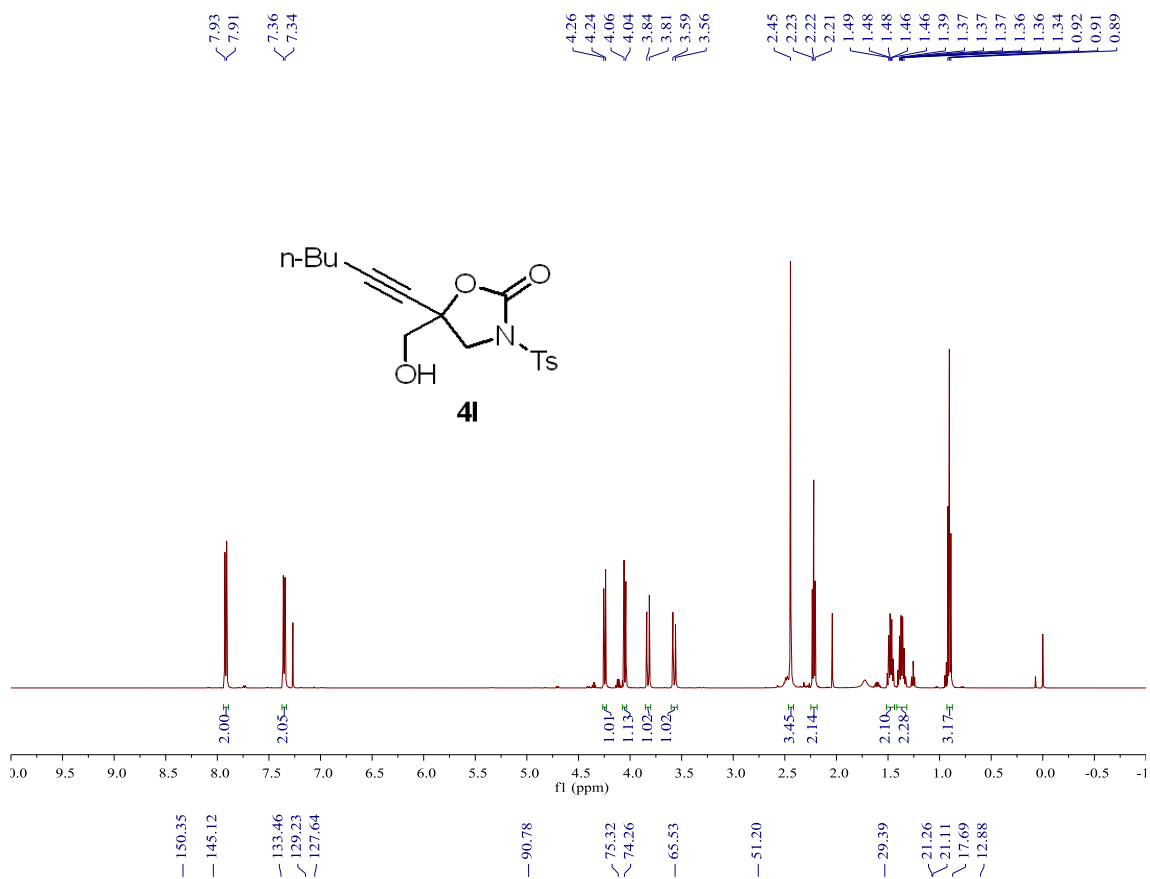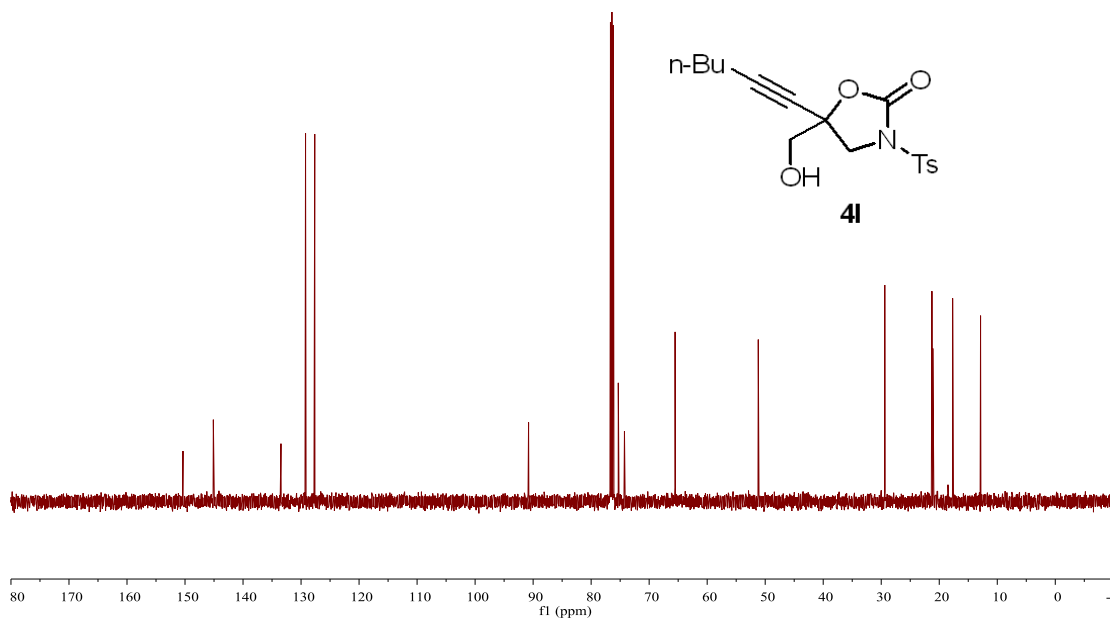

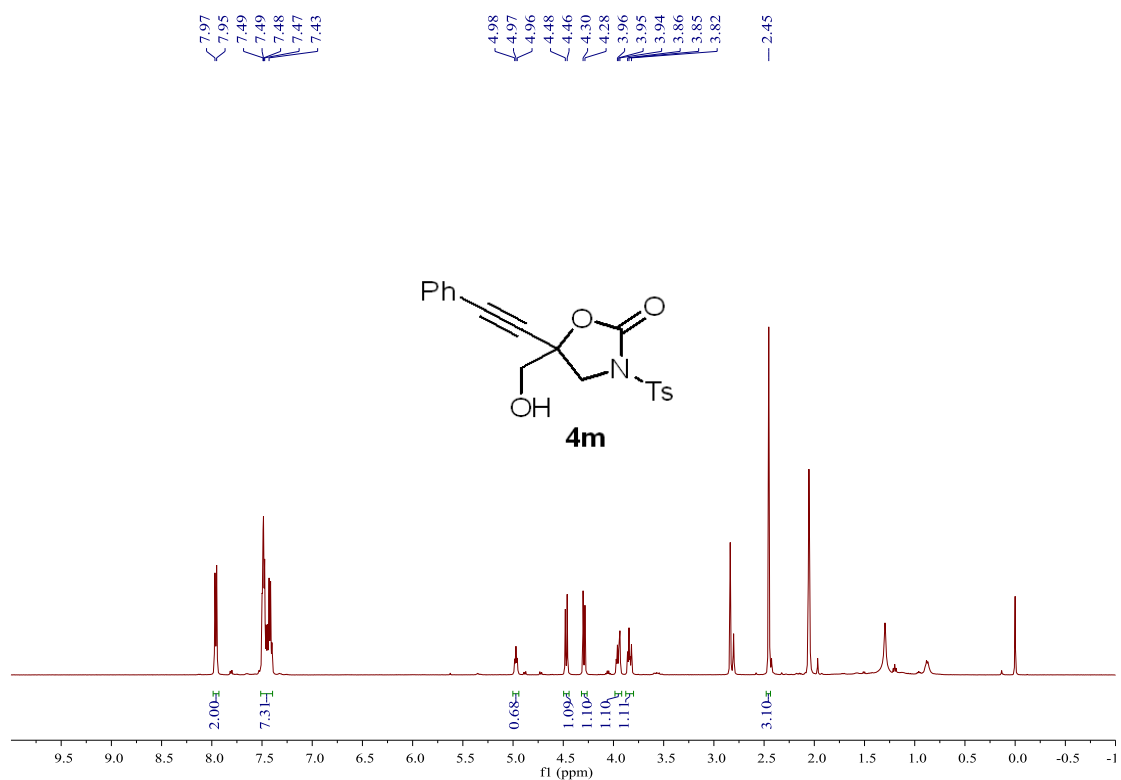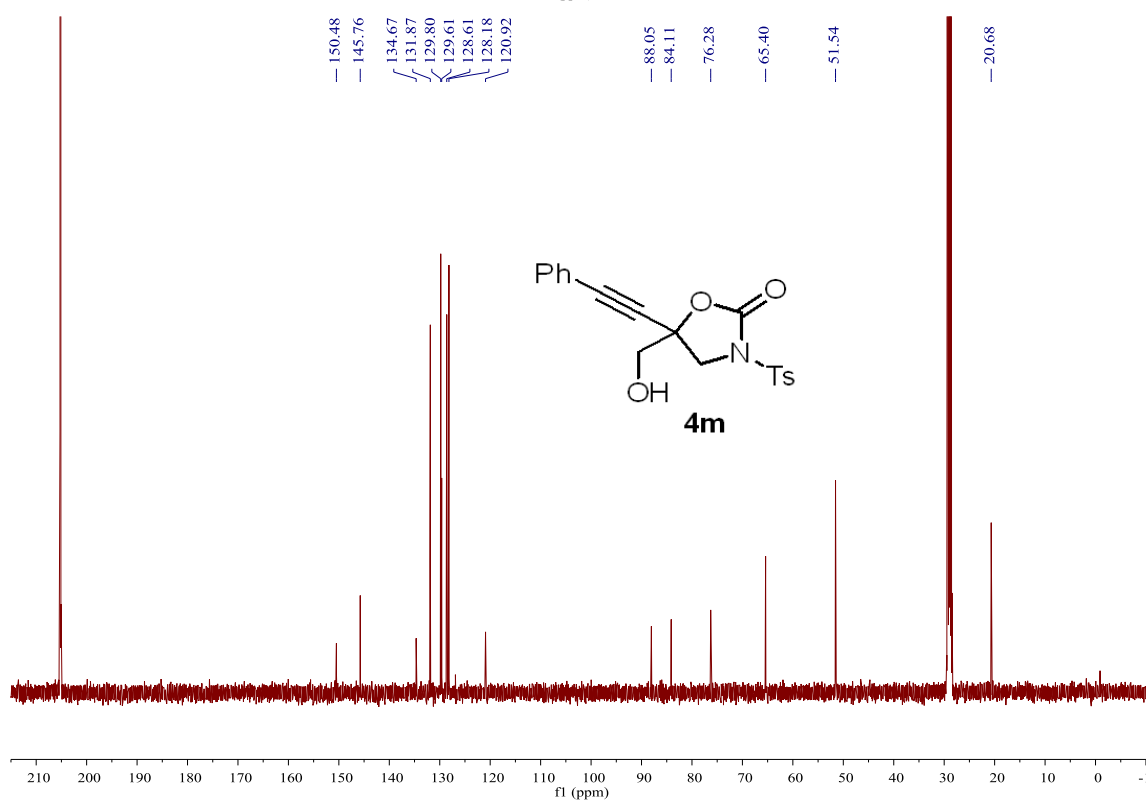

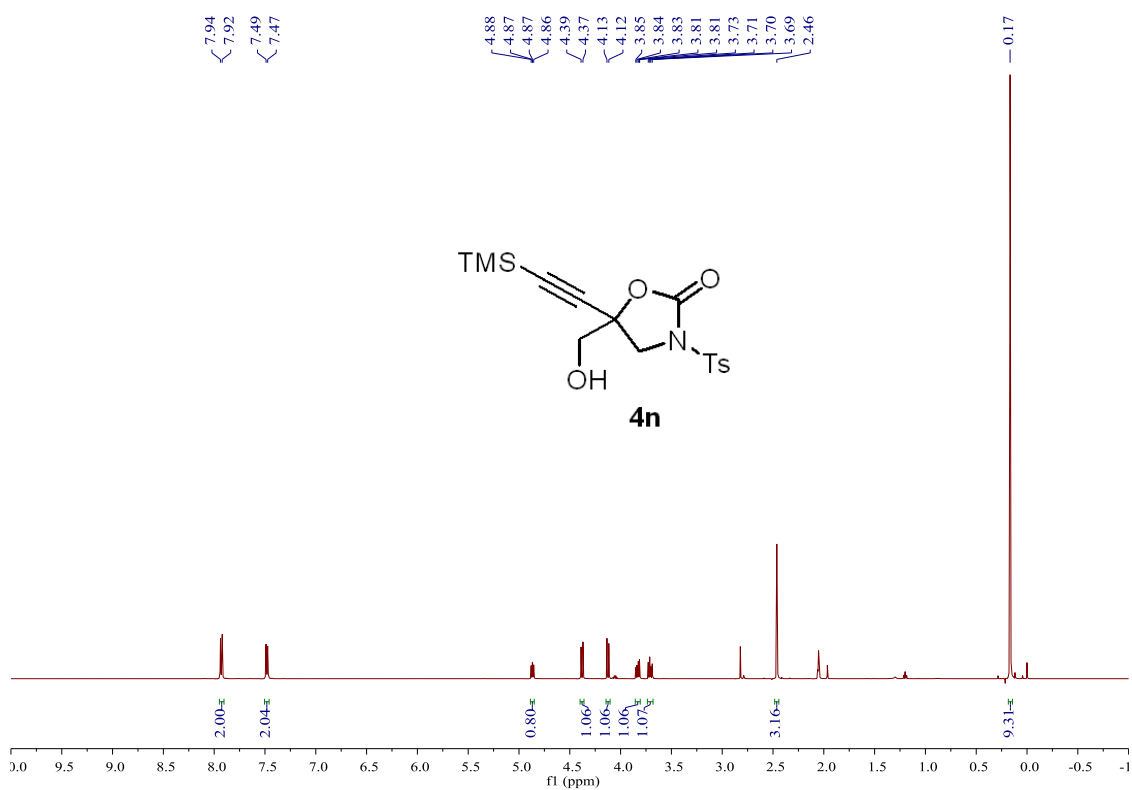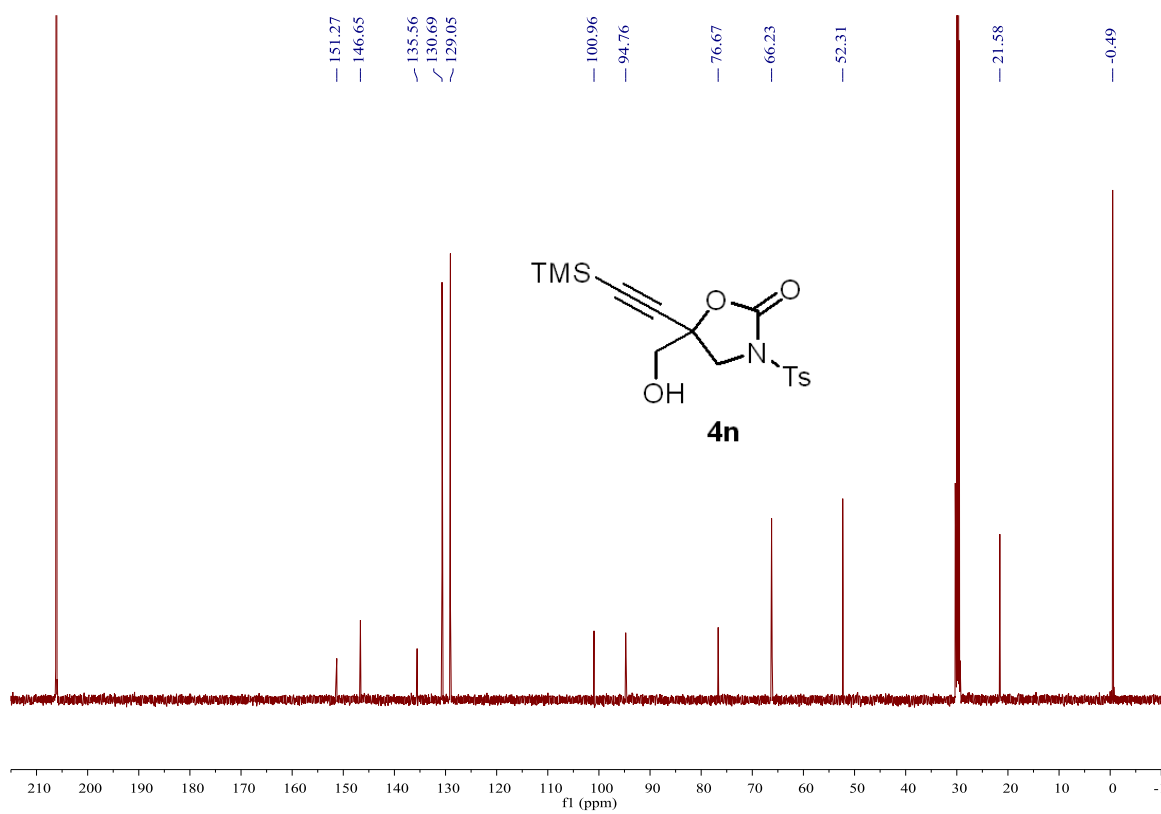



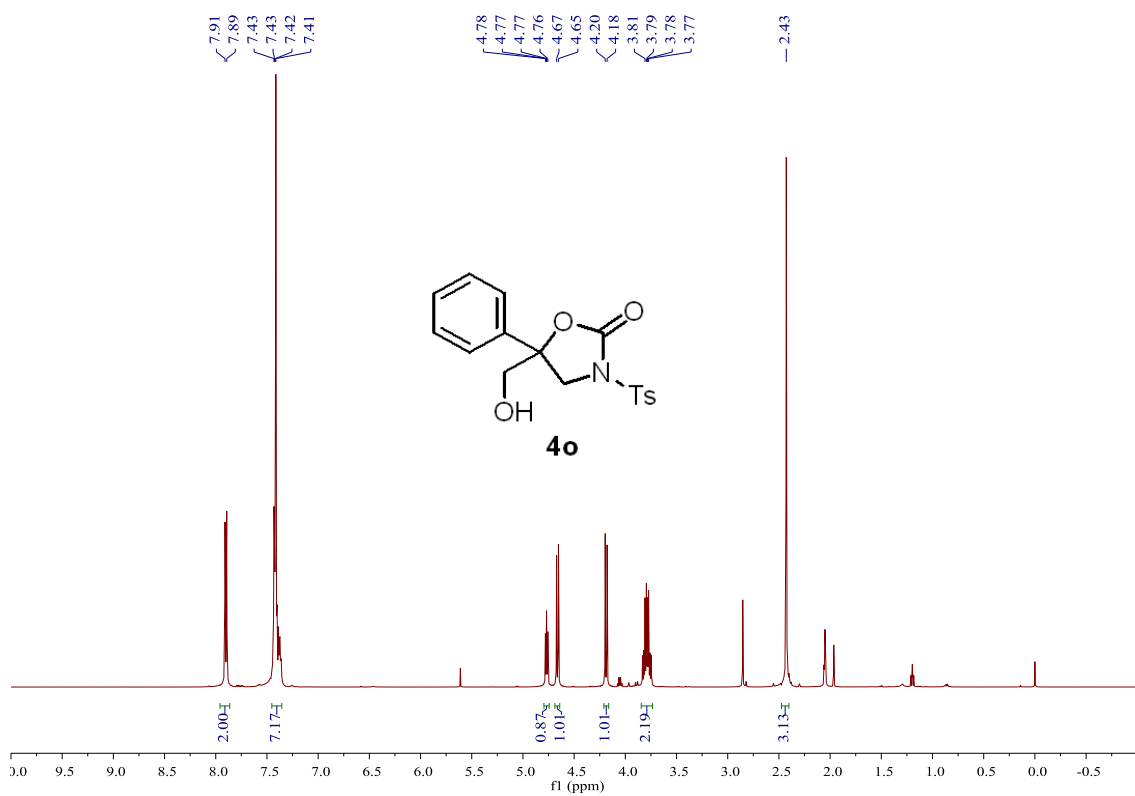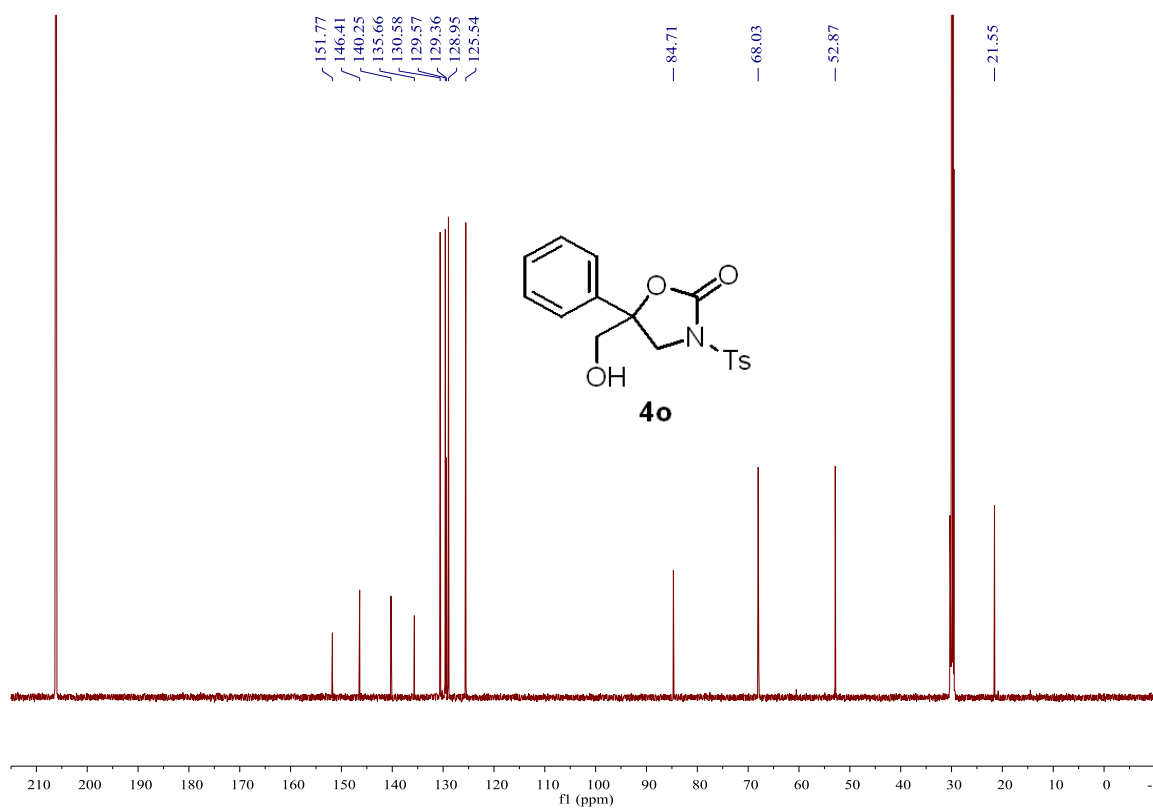

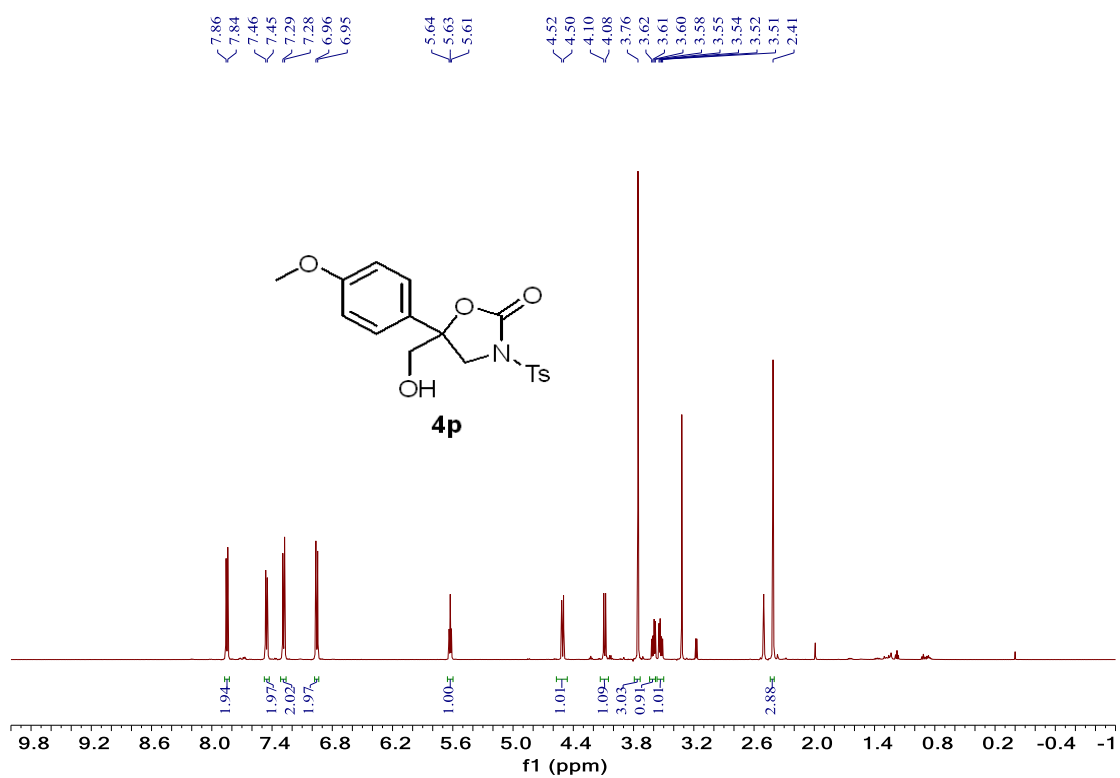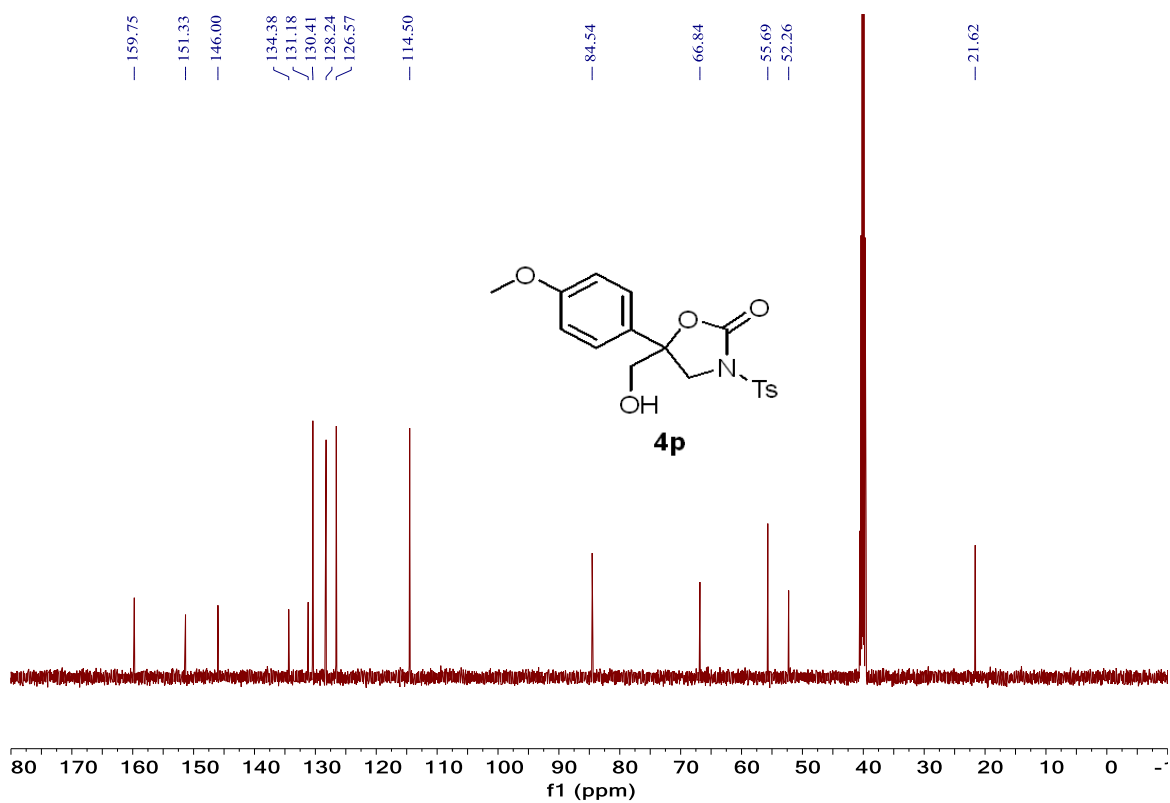

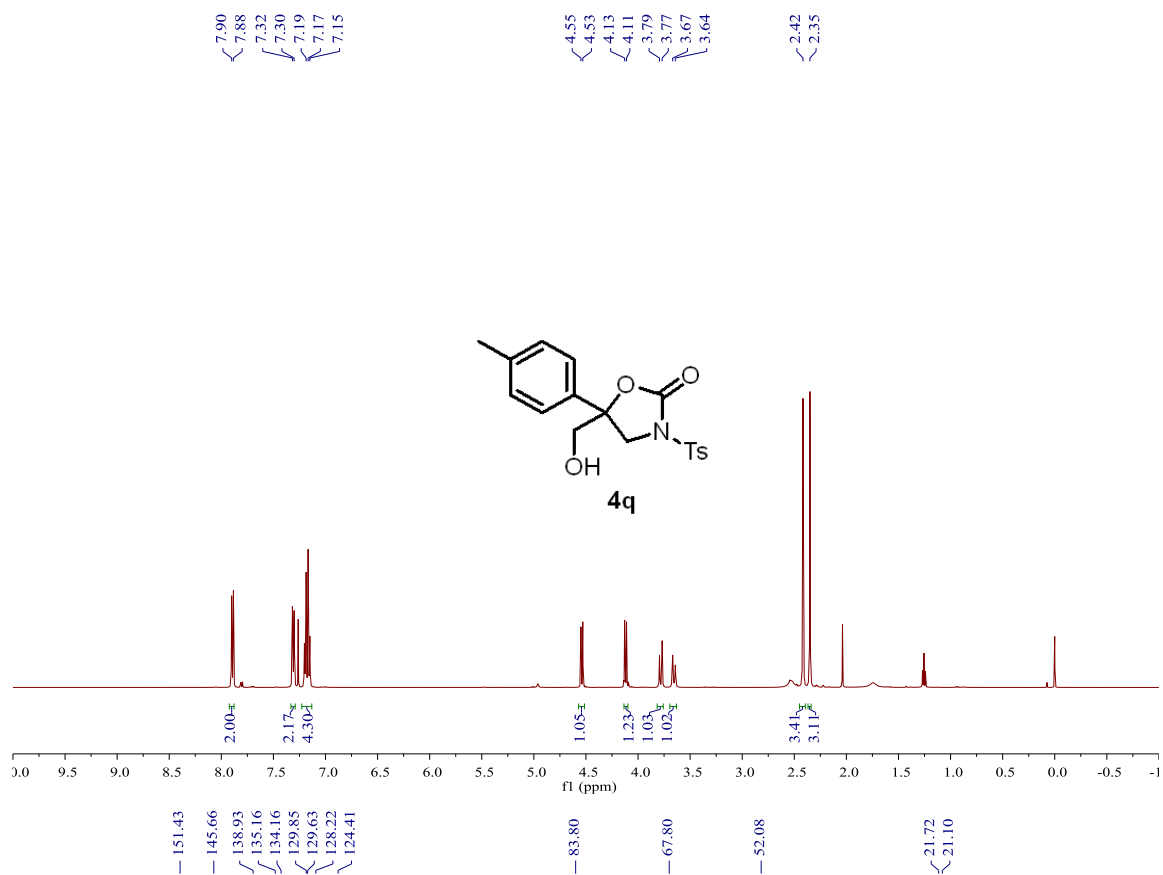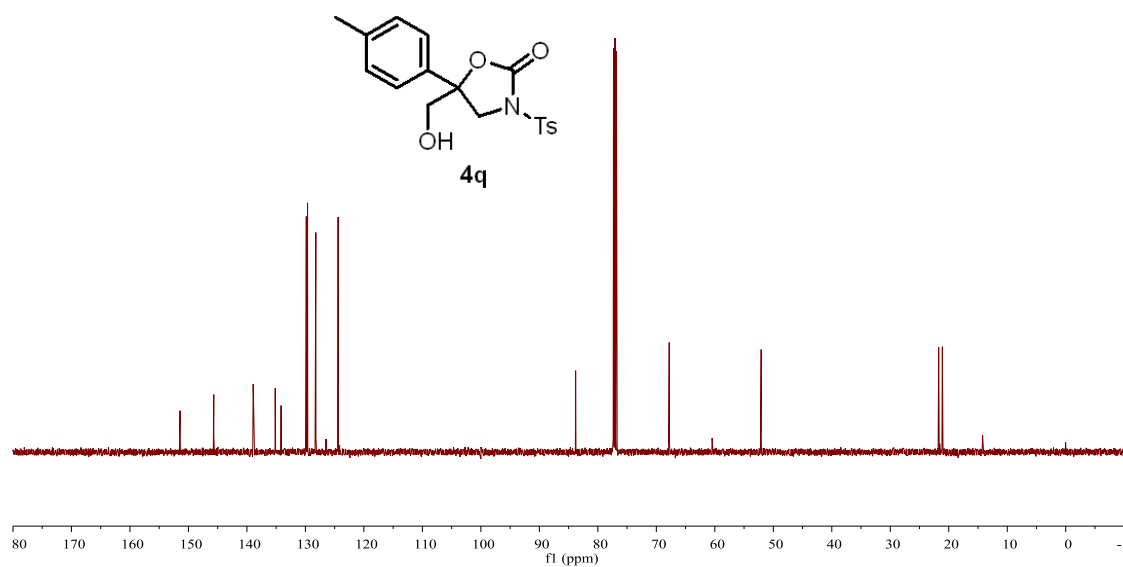

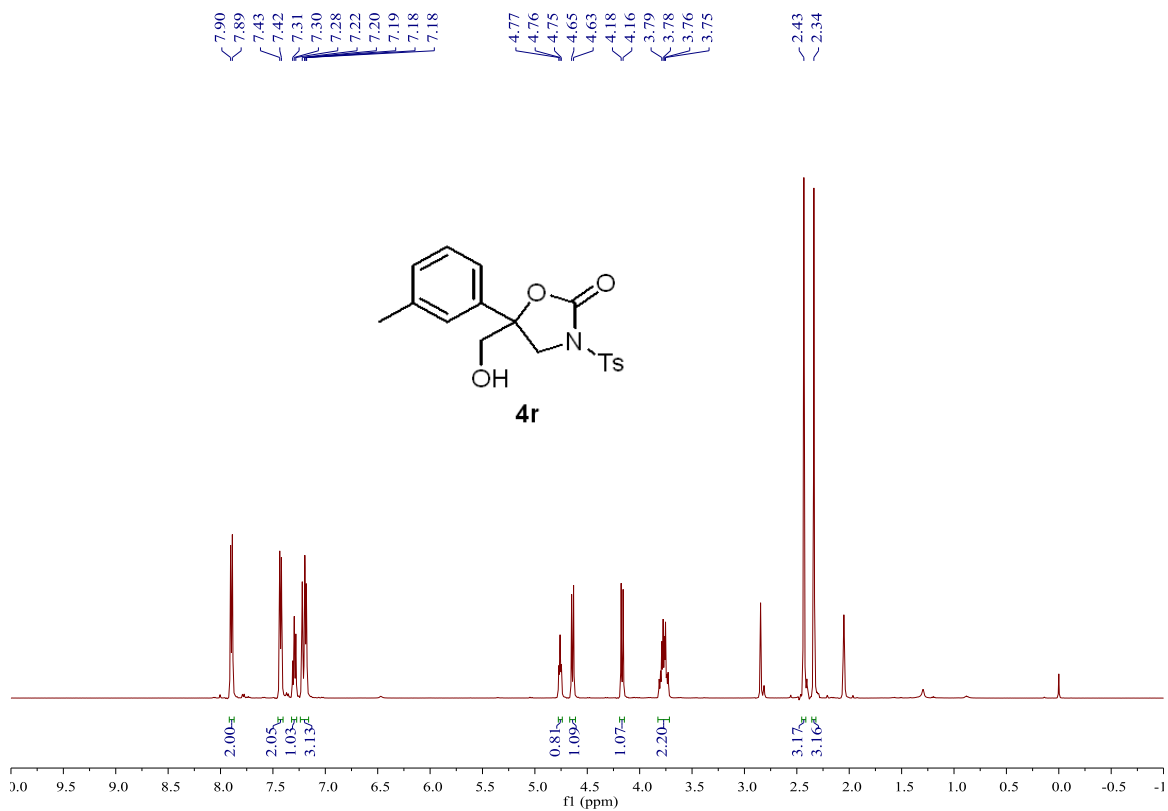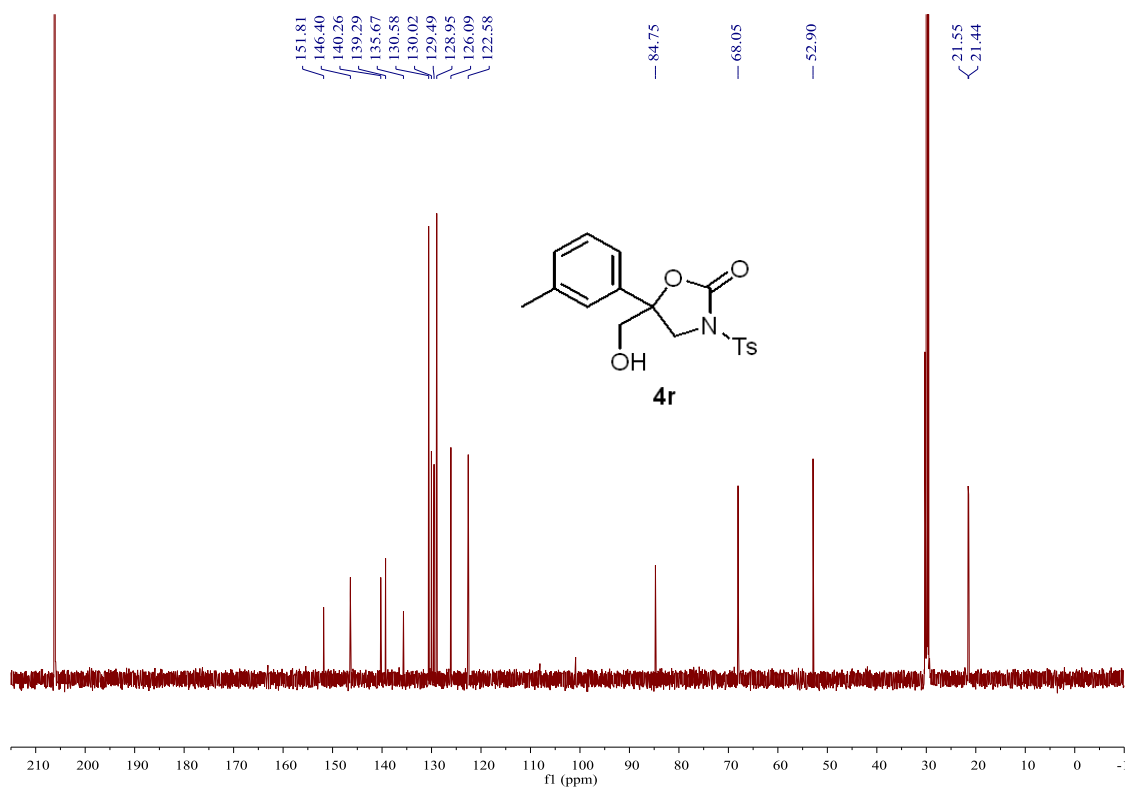

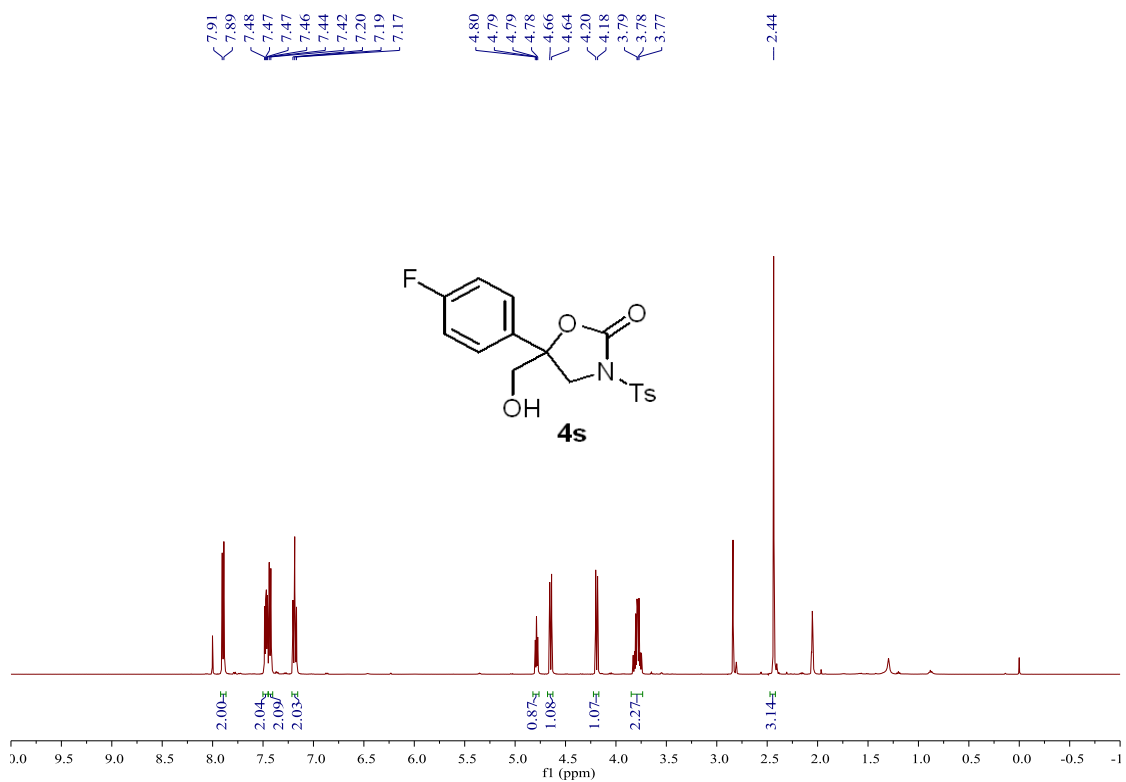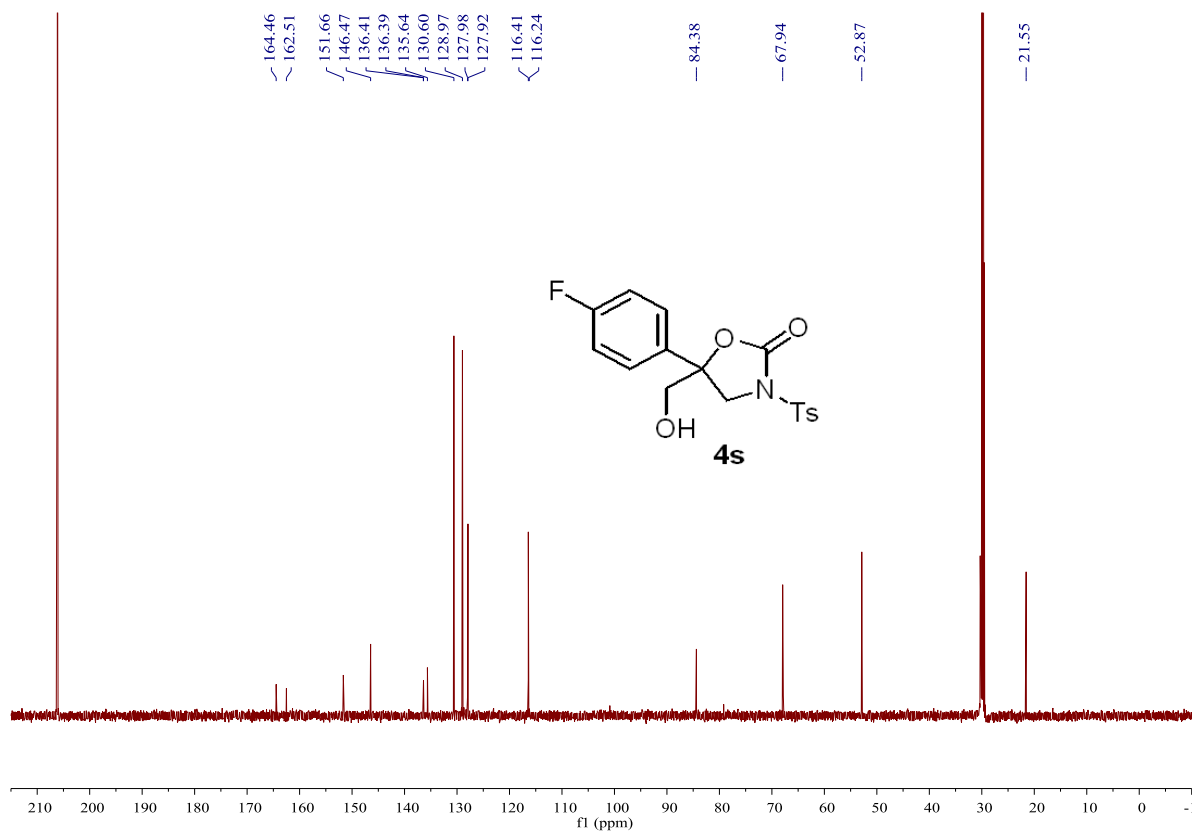

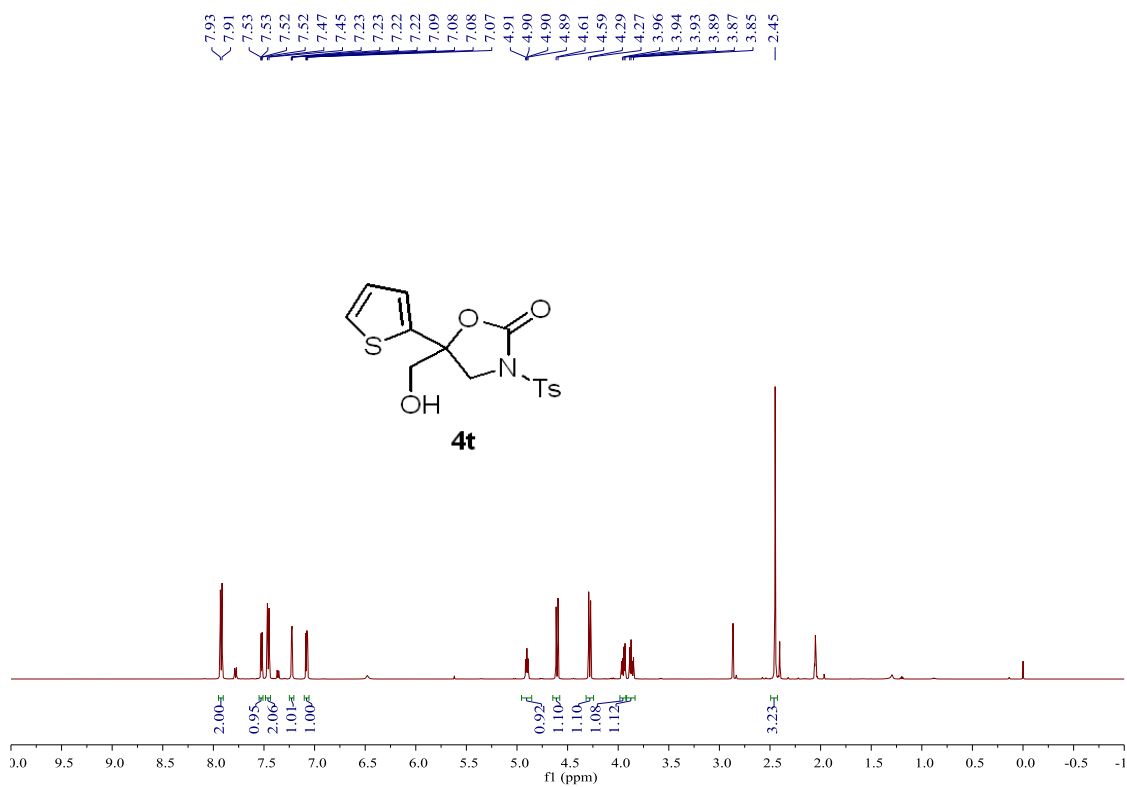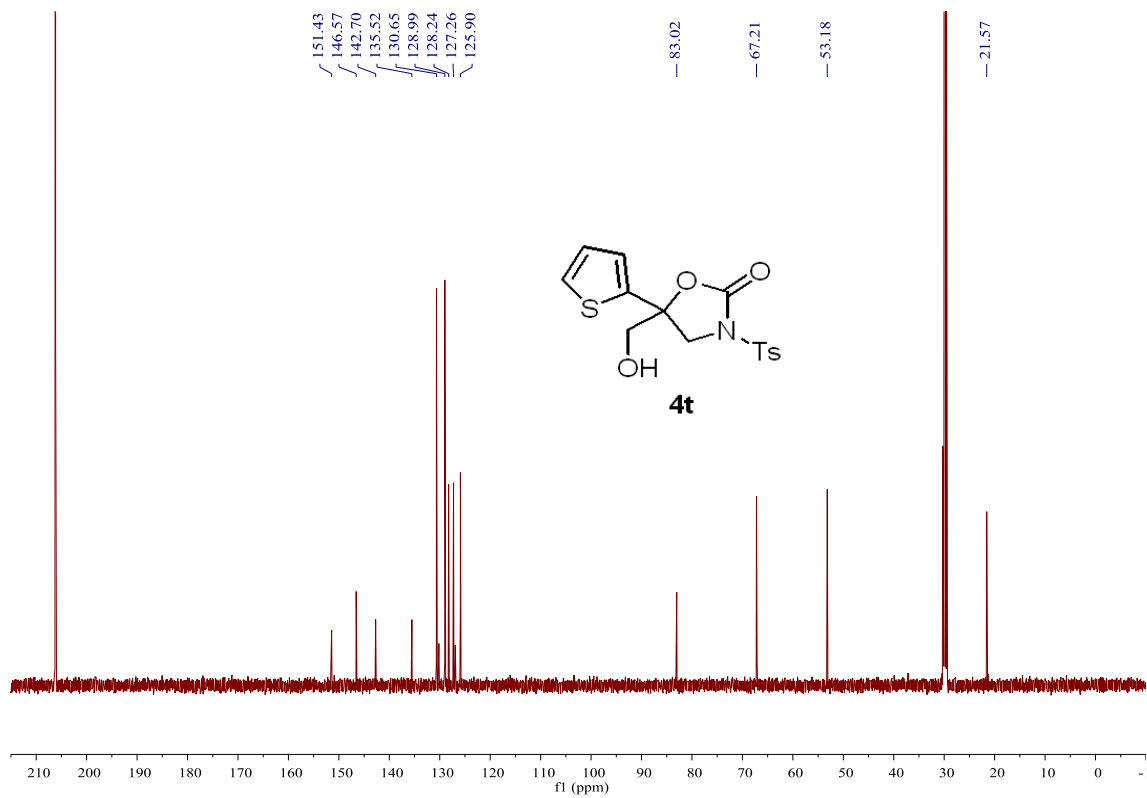

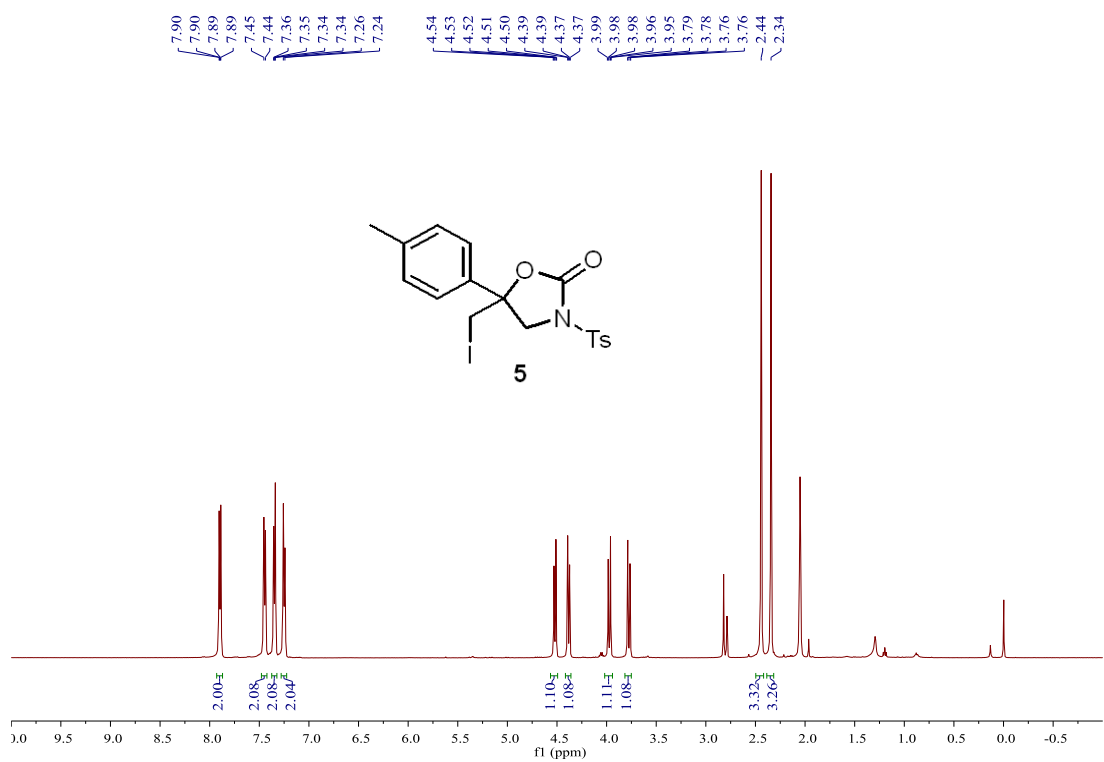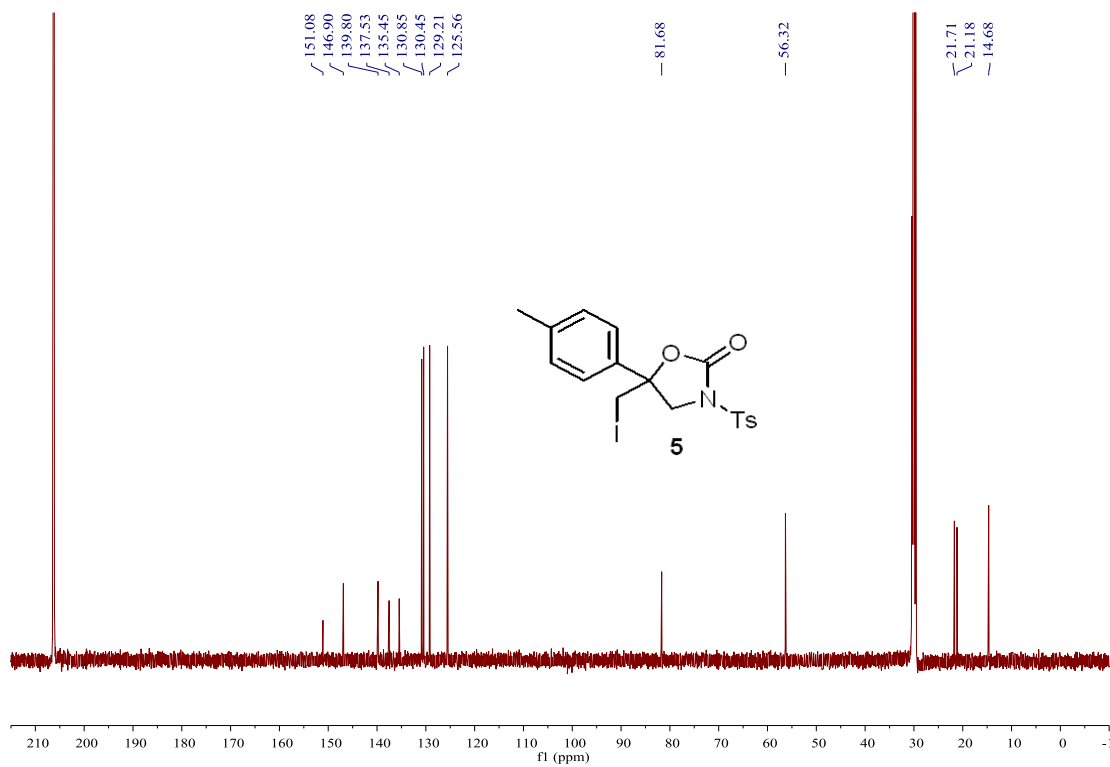

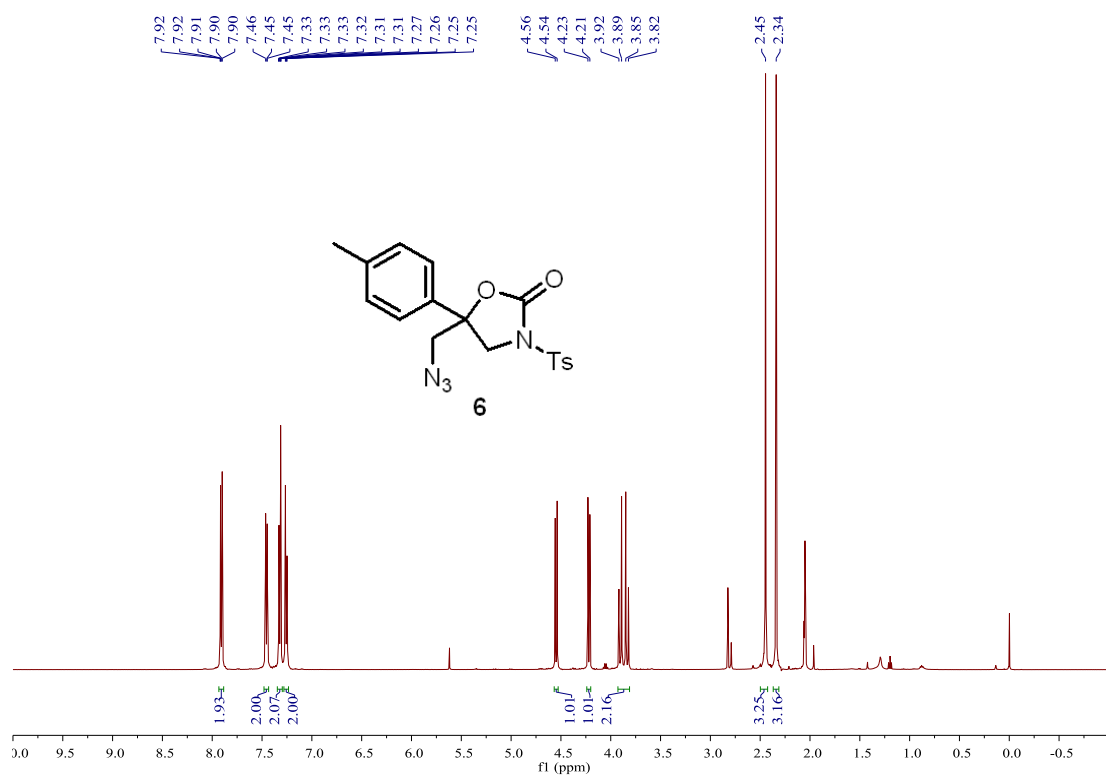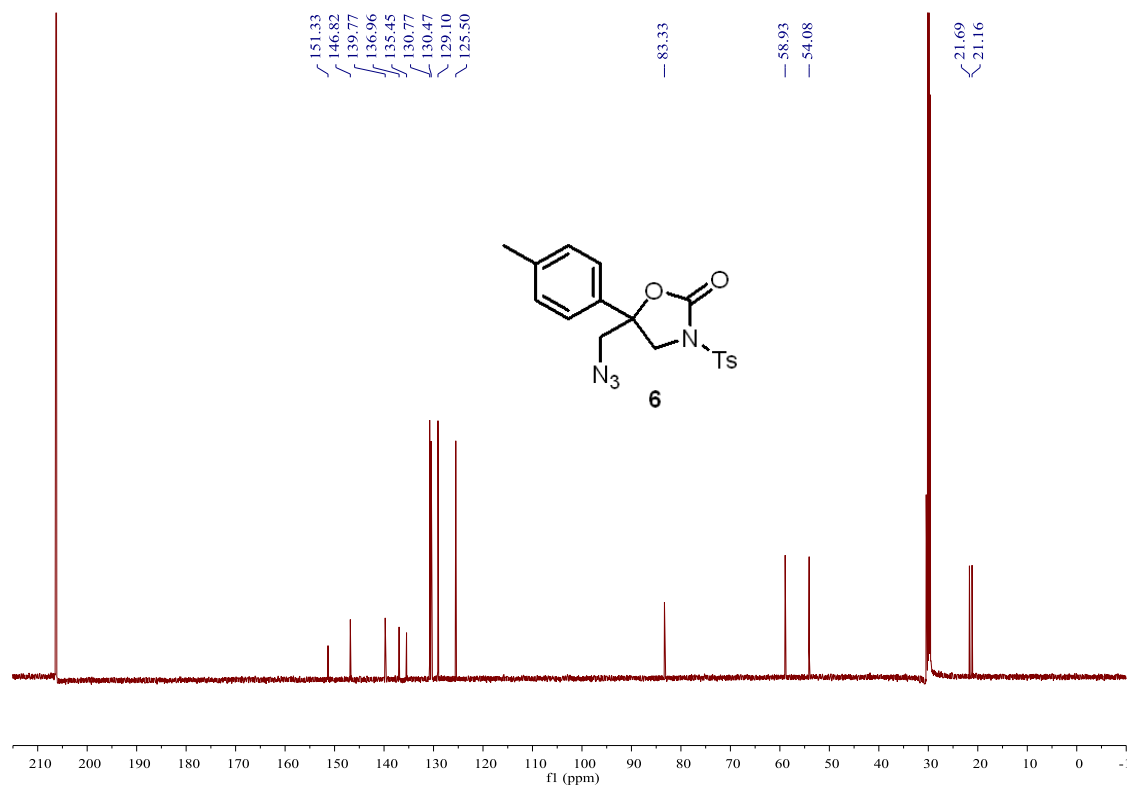



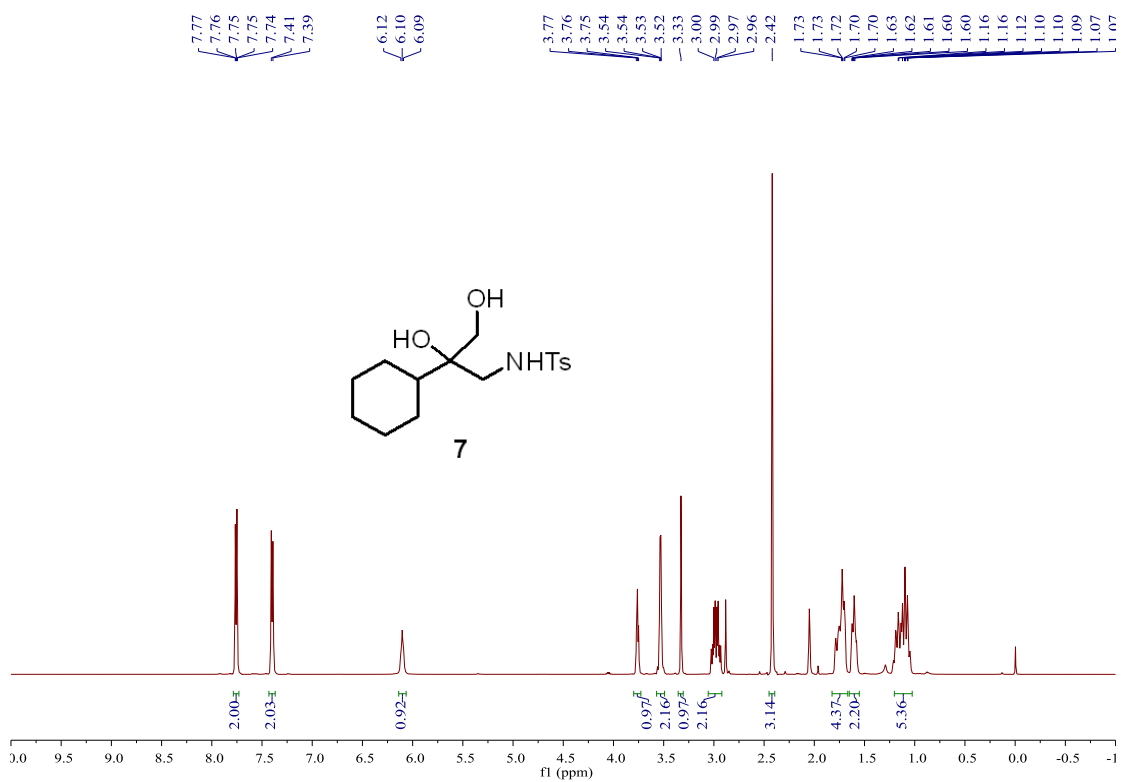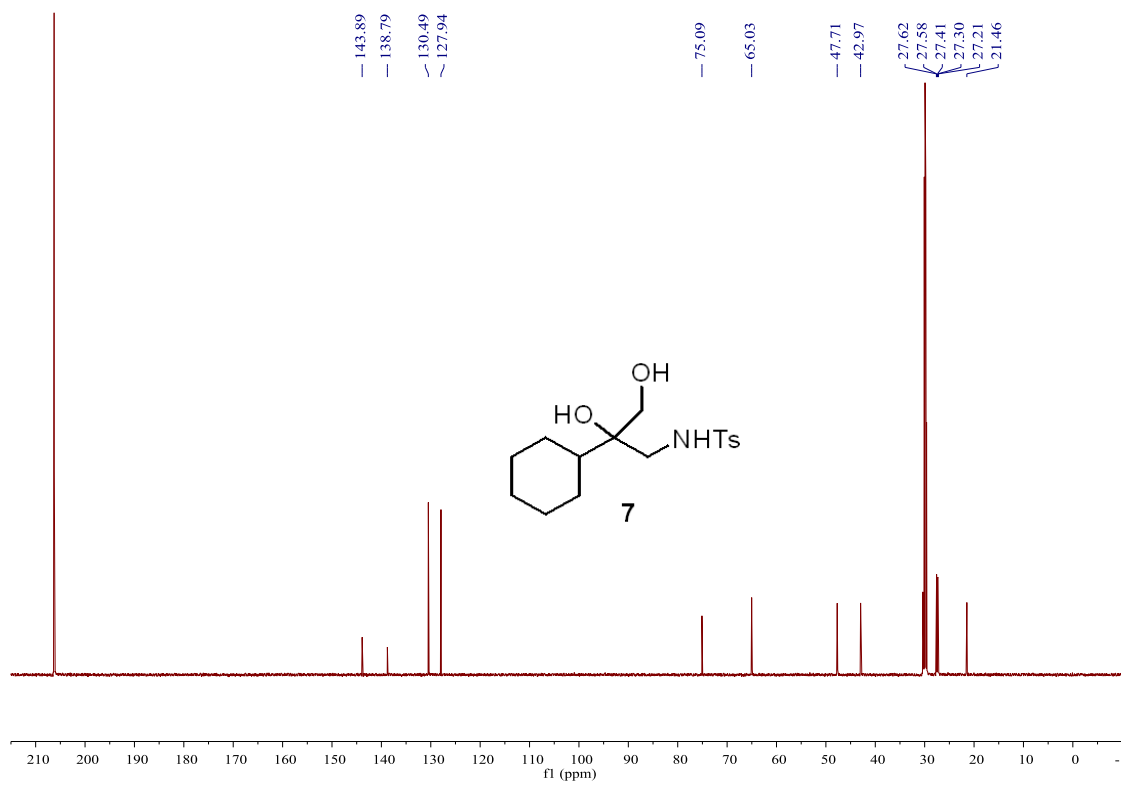

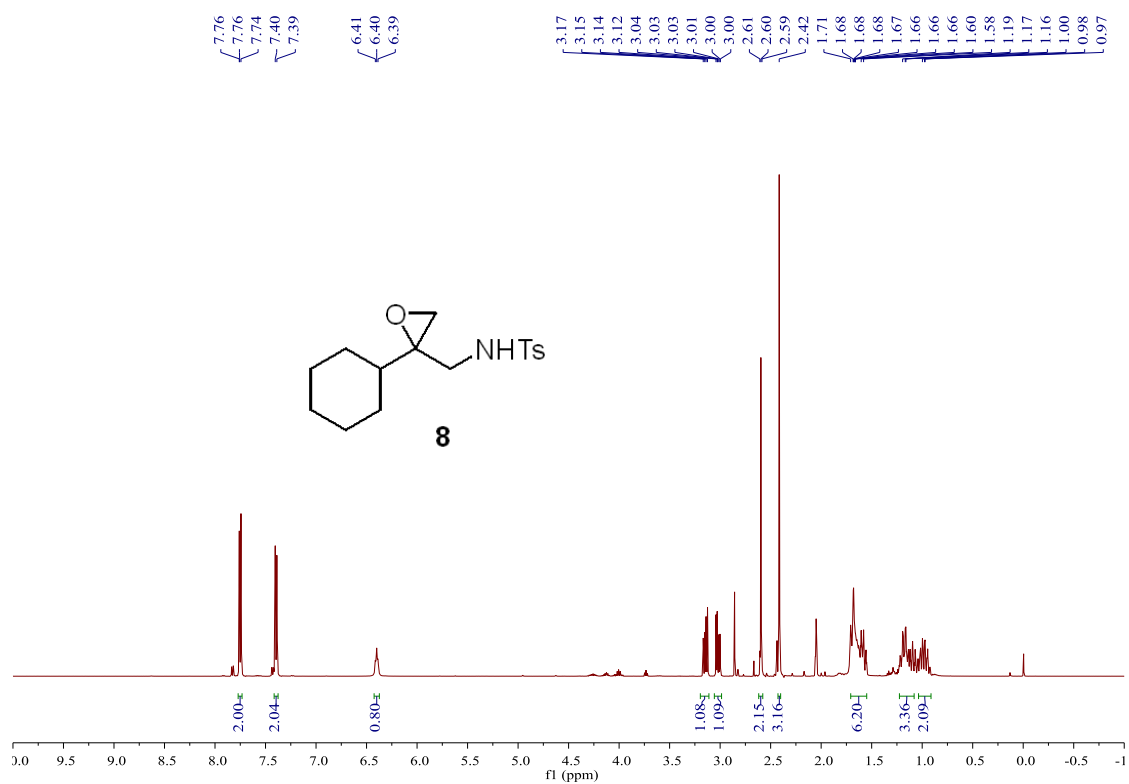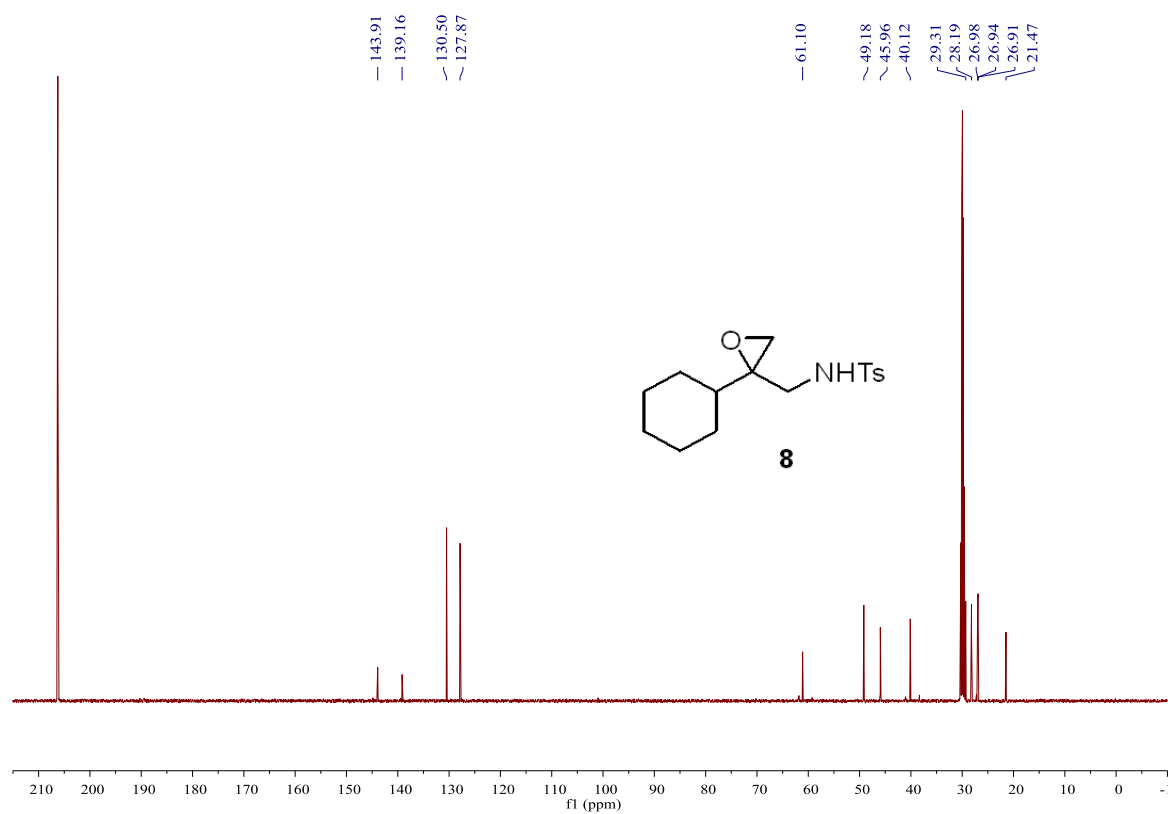

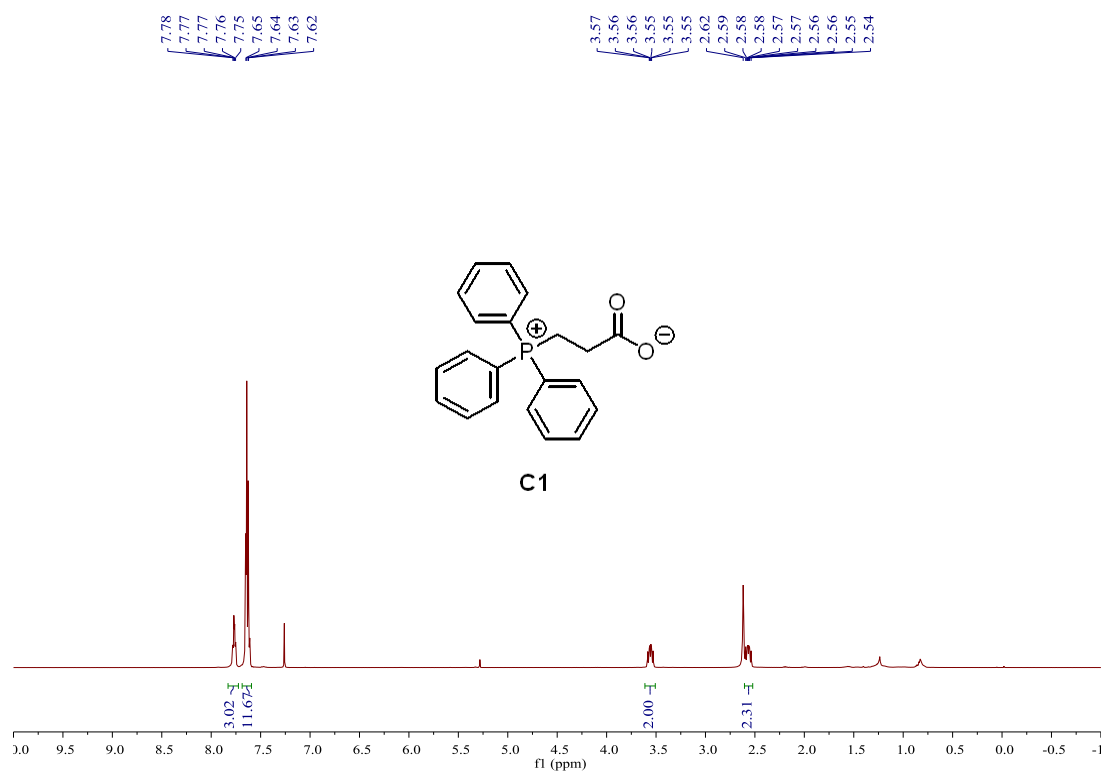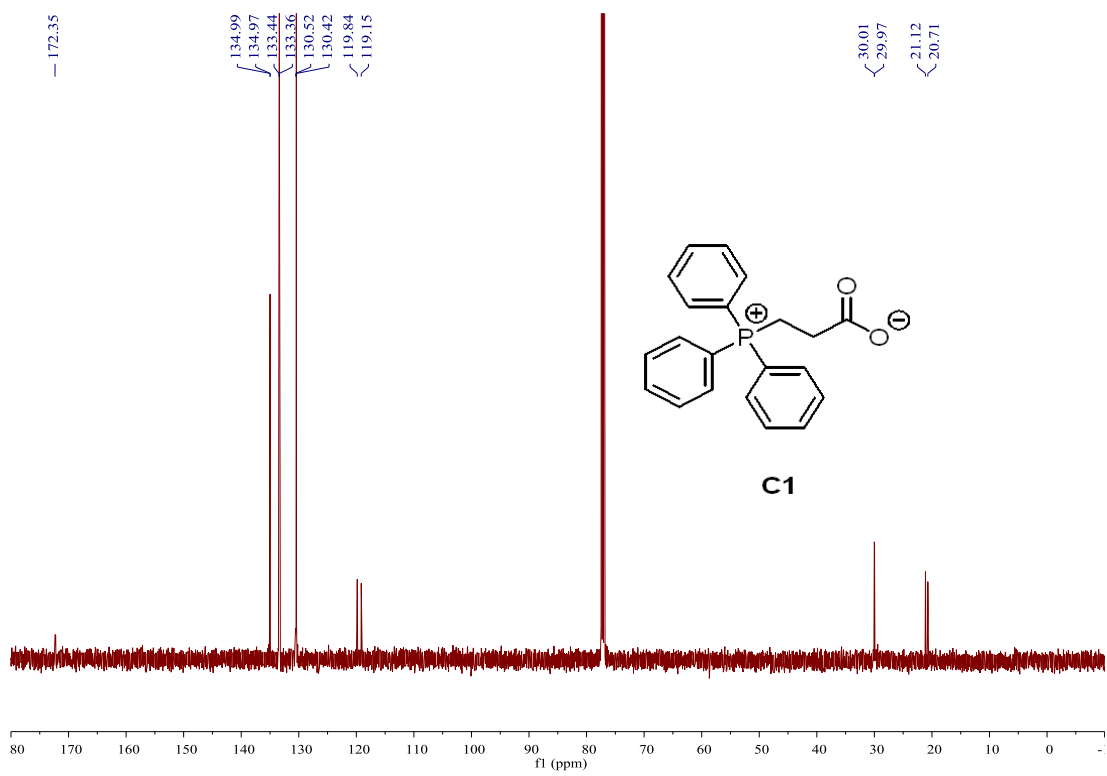

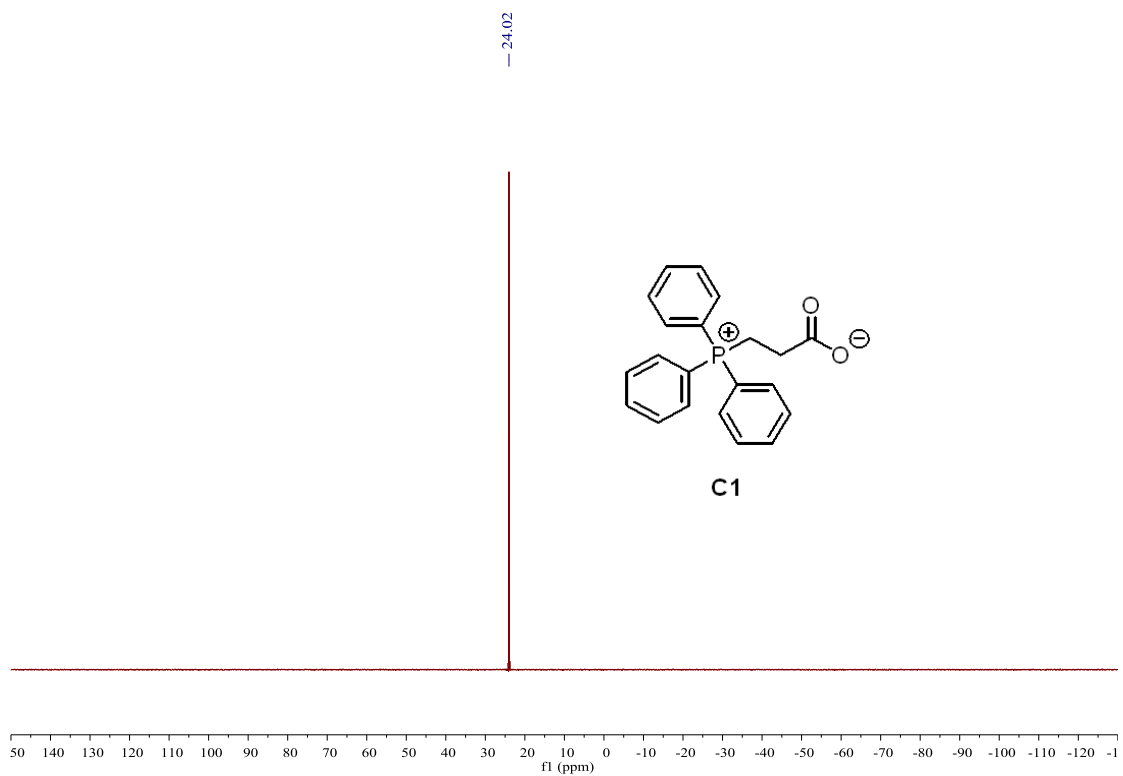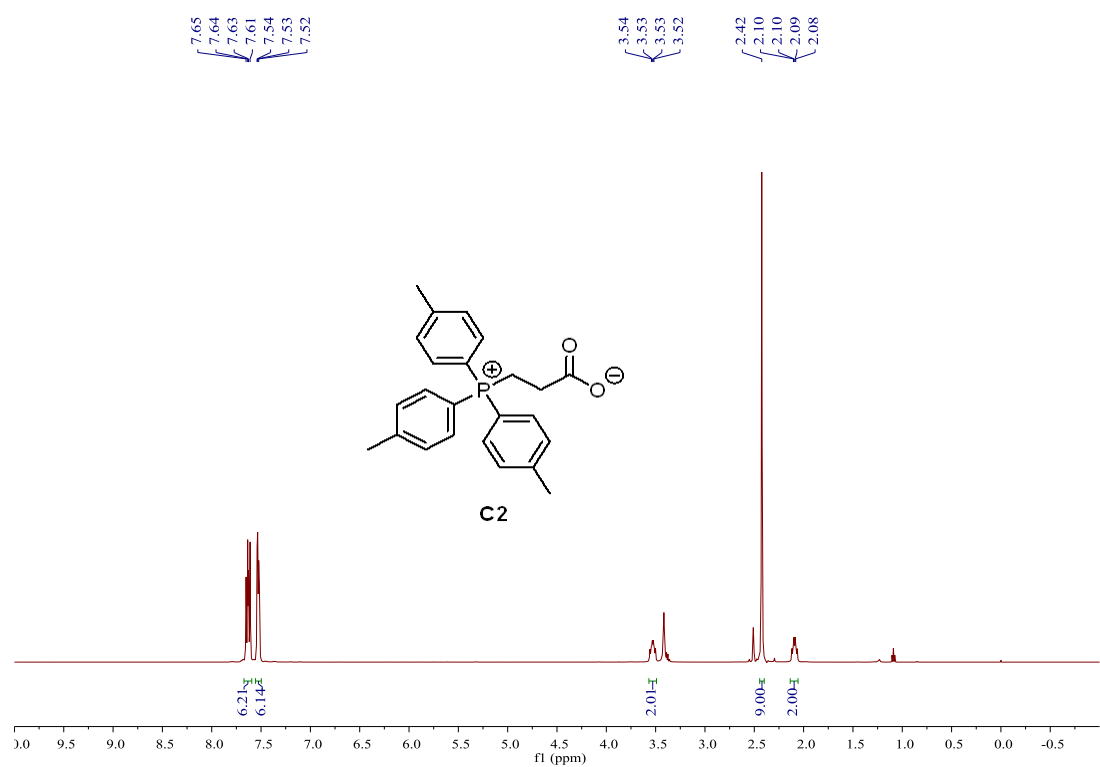

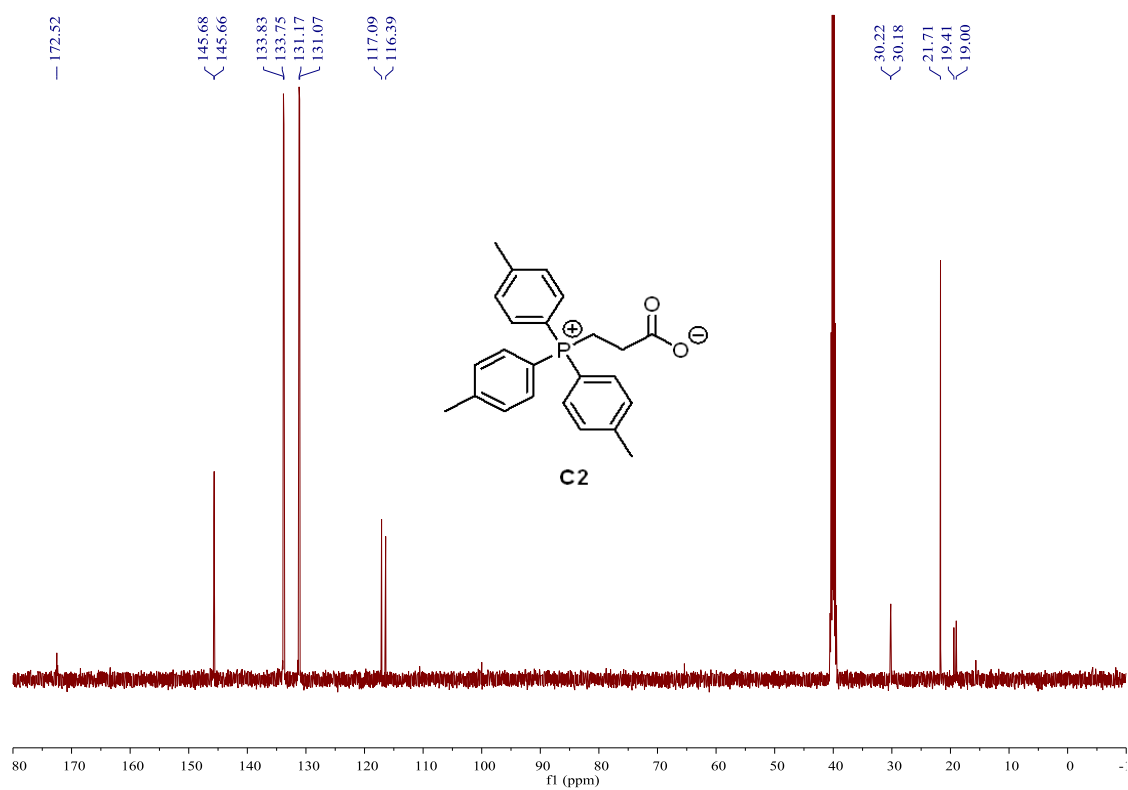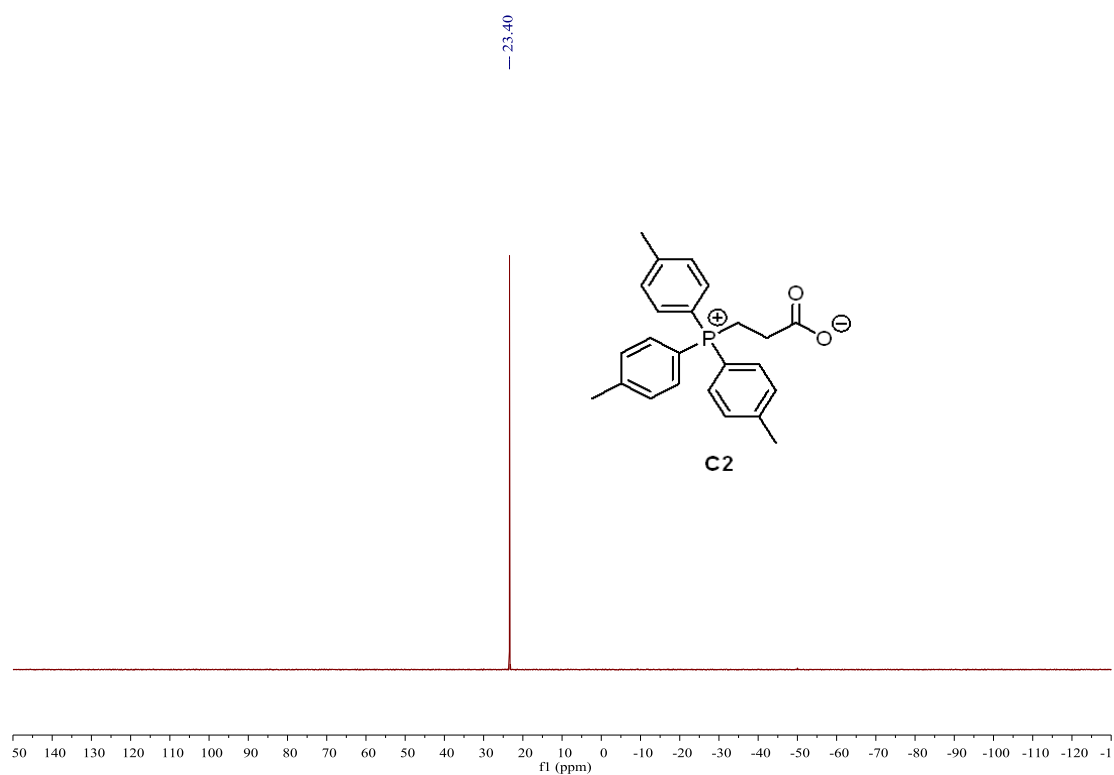

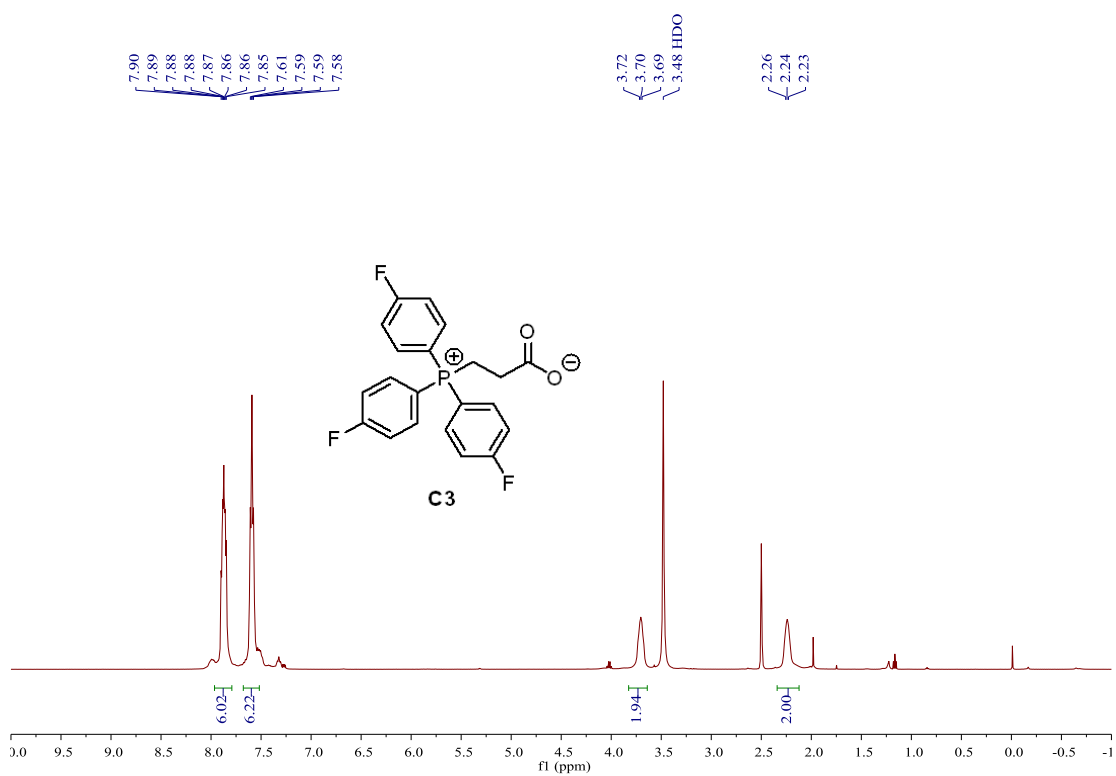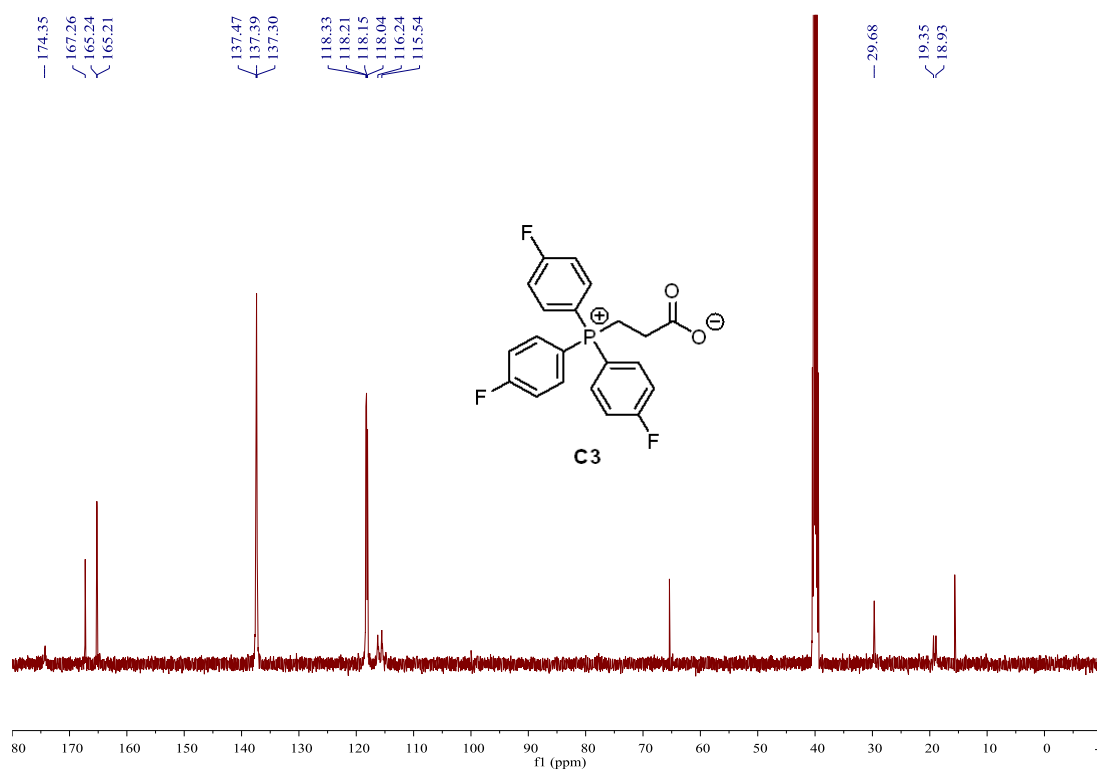

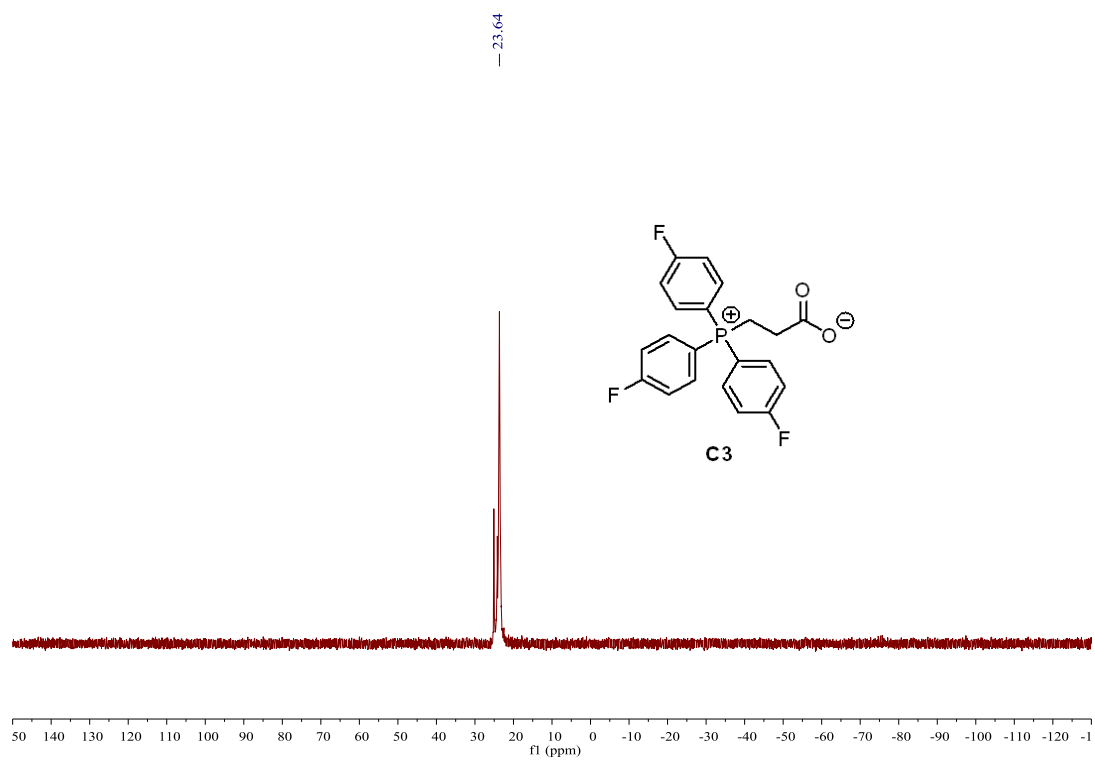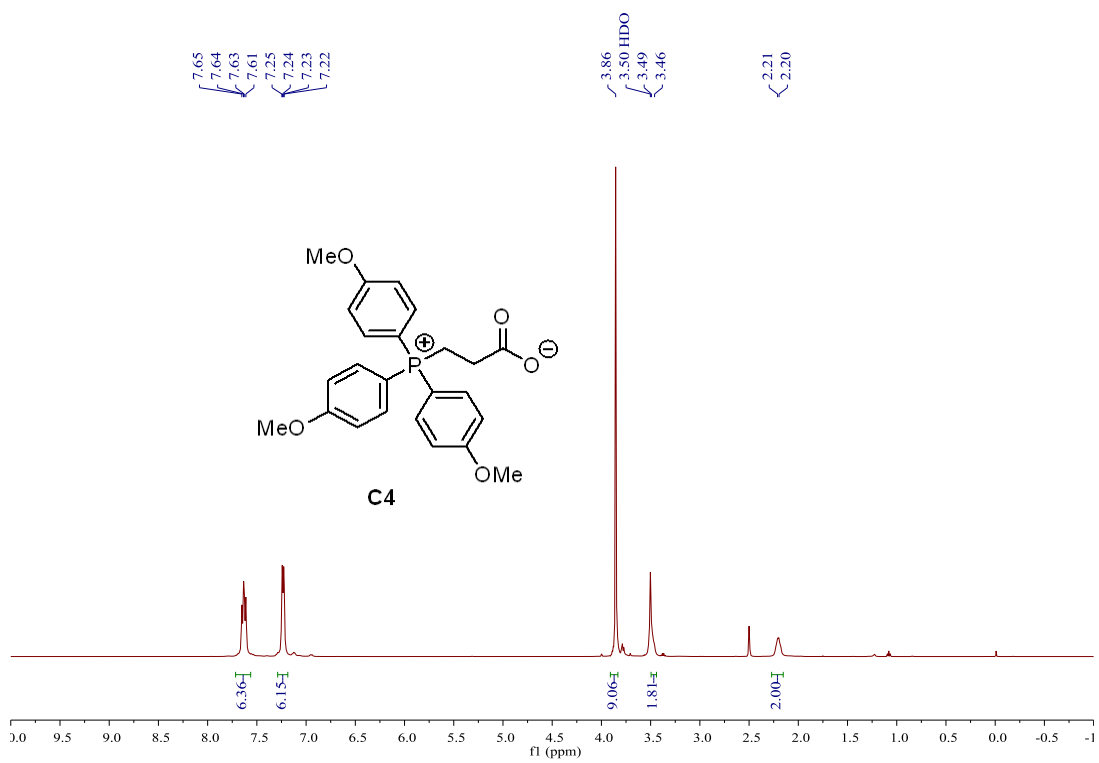

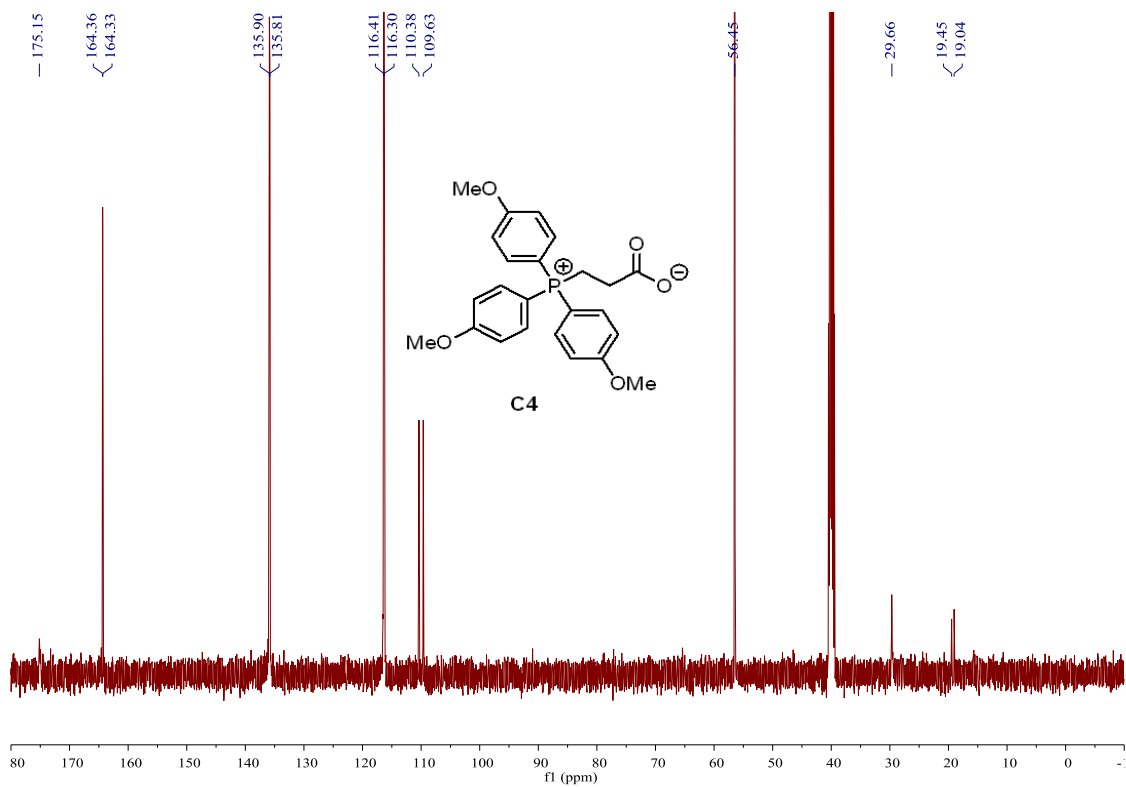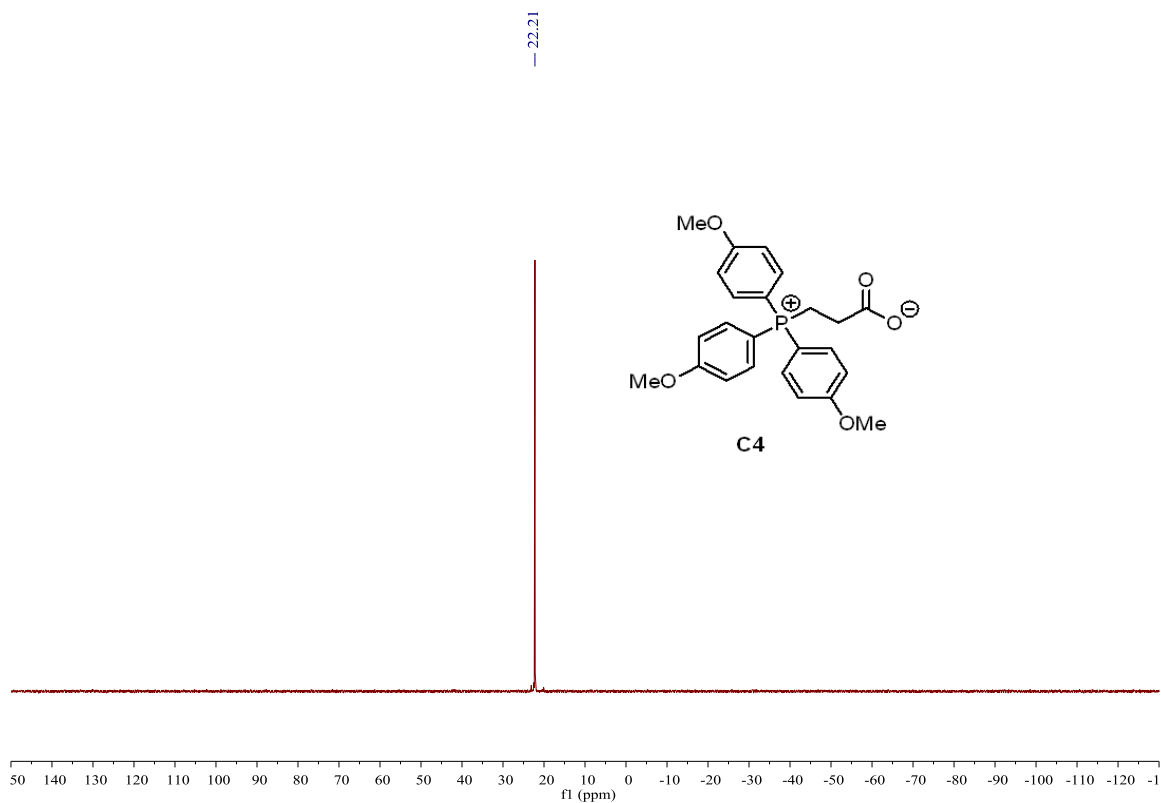



## 9. Theoretical Computation Section

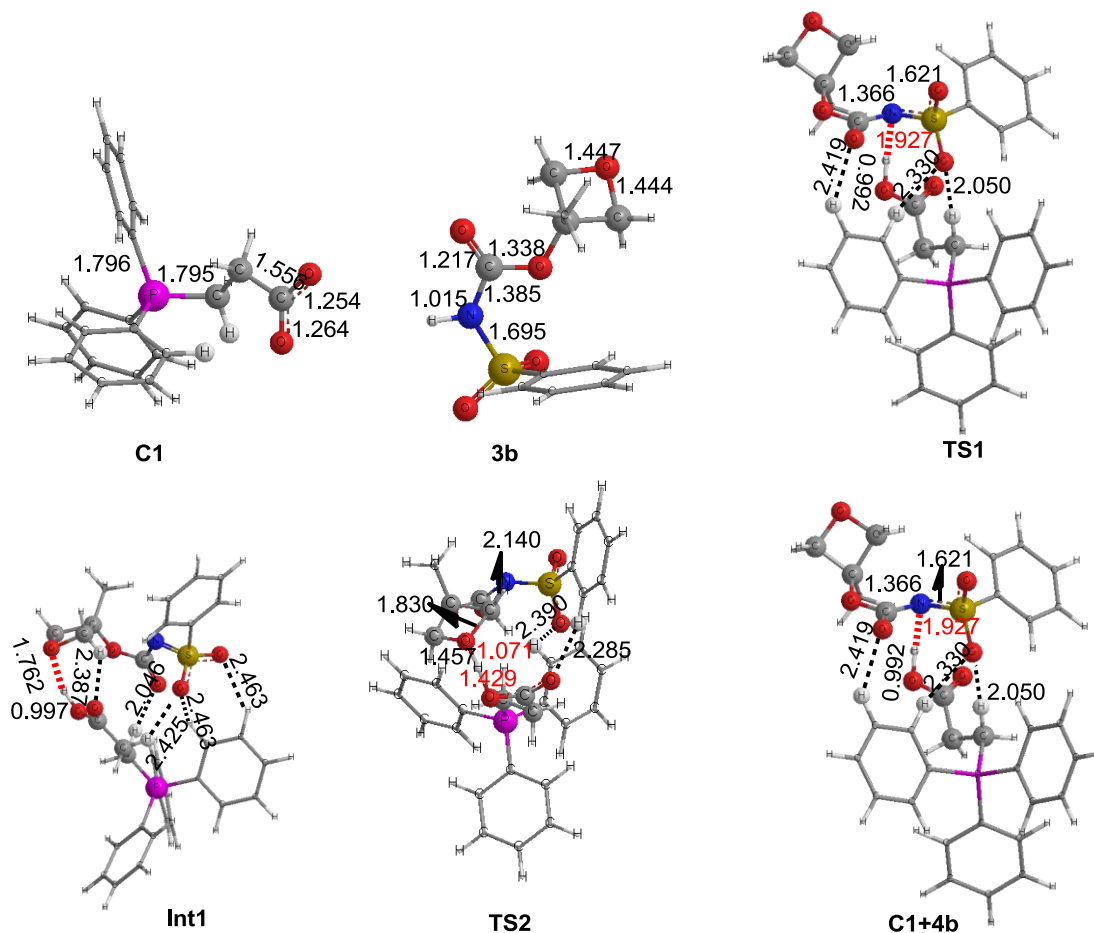

**Figure S3.** Structure of Intermediates and Transition States.

**Table S1.** Standard orientation of **C1** structure.

Standard orientation:

| Center<br>Number | Atomic<br>Number | Atomic<br>Type | Coordinates (Angstroms) |           |           |
|------------------|------------------|----------------|-------------------------|-----------|-----------|
|                  |                  |                | X                       | Y         | Z         |
| 1                | 6                | 0              | -3.589865               | -0.144925 | -1.667112 |
| 2                | 8                | 0              | -3.537353               | 1.112843  | -1.784412 |

|    |   |   |           |           |           |
|----|---|---|-----------|-----------|-----------|
| 3  | 8 | 0 | -4.584327 | -0.898697 | -1.793287 |
| 4  | 6 | 0 | -2.266544 | -0.855592 | -1.260758 |
| 5  | 1 | 0 | -2.352051 | -1.042422 | -0.179284 |
| 6  | 1 | 0 | -2.210355 | -1.845178 | -1.721570 |
| 7  | 6 | 0 | -1.025684 | -0.022270 | -1.590656 |
| 8  | 1 | 0 | -1.365258 | 1.005820  | -1.790514 |
| 9  | 1 | 0 | -0.506762 | -0.383637 | -2.484795 |
| 10 | 6 | 0 | 1.681489  | 0.844245  | -0.801505 |
| 11 | 6 | 0 | 1.608845  | 1.829187  | -1.797762 |
| 12 | 6 | 0 | 2.910792  | 0.549847  | -0.192027 |
| 13 | 6 | 0 | 2.763385  | 2.506771  | -2.185965 |
| 14 | 1 | 0 | 0.658749  | 2.067575  | -2.271071 |
| 15 | 6 | 0 | 4.059428  | 1.233524  | -0.584274 |
| 16 | 1 | 0 | 2.974084  | -0.219171 | 0.576628  |
| 17 | 6 | 0 | 3.986558  | 2.210531  | -1.580386 |
| 18 | 1 | 0 | 2.706698  | 3.264975  | -2.961488 |
| 19 | 1 | 0 | 5.010377  | 1.000579  | -0.114403 |
| 20 | 1 | 0 | 4.884614  | 2.739753  | -1.886957 |
| 21 | 6 | 0 | 0.601457  | -1.652345 | 0.237085  |
| 22 | 6 | 0 | -0.013001 | -2.250150 | 1.345918  |
| 23 | 6 | 0 | 1.475950  | -2.397567 | -0.570472 |
| 24 | 6 | 0 | 0.260155  | -3.583117 | 1.652265  |

|    |    |   |           |           |           |
|----|----|---|-----------|-----------|-----------|
| 25 | 1  | 0 | -0.698703 | -1.677922 | 1.968664  |
| 26 | 6  | 0 | 1.743312  | -3.727770 | -0.257360 |
| 27 | 1  | 0 | 1.947774  | -1.939657 | -1.438421 |
| 28 | 6  | 0 | 1.137289  | -4.320029 | 0.854103  |
| 29 | 1  | 0 | -0.214072 | -4.044432 | 2.513293  |
| 30 | 1  | 0 | 2.423524  | -4.301302 | -0.880152 |
| 31 | 1  | 0 | 1.348841  | -5.357591 | 1.097121  |
| 32 | 6  | 0 | -0.535893 | 0.897712  | 1.132546  |
| 33 | 6  | 0 | -1.793482 | 1.508664  | 1.014619  |
| 34 | 6  | 0 | 0.200673  | 1.007741  | 2.323615  |
| 35 | 6  | 0 | -2.310872 | 2.215813  | 2.100986  |
| 36 | 1  | 0 | -2.371582 | 1.440653  | 0.088691  |
| 37 | 6  | 0 | -0.325212 | 1.720385  | 3.397488  |
| 38 | 1  | 0 | 1.180866  | 0.540821  | 2.414582  |
| 39 | 6  | 0 | -1.582763 | 2.322789  | 3.286456  |
| 40 | 1  | 0 | -3.286372 | 2.685706  | 2.015622  |
| 41 | 1  | 0 | 0.244499  | 1.806979  | 4.318163  |
| 42 | 1  | 0 | -1.992171 | 2.877237  | 4.126383  |
| 43 | 15 | 0 | 0.178309  | 0.020492  | -0.260649 |

---

Sum of electronic and zero-point Energies= -1303.138669

Sum of electronic and thermal Energies= -1303.118060

Sum of electronic and thermal Enthalpies= -1303.117115

Sum of electronic and thermal Free Energies= -1303.189837

**Table S2.** Standard orientation of **3b** structure.

Standard orientation:

| -----  |        |        |                         |           |           |
|--------|--------|--------|-------------------------|-----------|-----------|
| Center | Atomic | Atomic | Coordinates (Angstroms) |           |           |
| Number | Number | Type   | X                       | Y         | Z         |
| -----  |        |        |                         |           |           |
| 1      | 16     | 0      | -1.475878               | 1.491209  | -0.524573 |
| 2      | 8      | 0      | -2.611566               | 2.316773  | -0.156715 |
| 3      | 8      | 0      | -0.873096               | 1.595369  | -1.836901 |
| 4      | 6      | 0      | -1.831206               | -0.210036 | -0.200471 |
| 5      | 6      | 0      | -2.556837               | -0.536468 | 0.947791  |
| 6      | 6      | 0      | -1.402405               | -1.181210 | -1.106264 |
| 7      | 6      | 0      | -2.847553               | -1.876528 | 1.196883  |
| 8      | 1      | 0      | -2.888971               | 0.242834  | 1.629534  |
| 9      | 6      | 0      | -1.708740               | -2.517096 | -0.848412 |
| 10     | 1      | 0      | -0.838447               | -0.886243 | -1.987036 |
| 11     | 6      | 0      | -2.425304               | -2.862718 | 0.300445  |
| 12     | 1      | 0      | -3.409793               | -2.149715 | 2.084654  |
| 13     | 1      | 0      | -1.385319               | -3.286560 | -1.543419 |
| 14     | 1      | 0      | -2.659081               | -3.905254 | 0.497319  |
| 15     | 7      | 0      | -0.326826               | 1.900115  | 0.652098  |
| 16     | 1      | 0      | -0.621739               | 2.597337  | 1.327974  |

|    |   |   |          |           |           |
|----|---|---|----------|-----------|-----------|
| 17 | 6 | 0 | 0.897782 | 1.291133  | 0.873097  |
| 18 | 8 | 0 | 1.641113 | 1.589191  | 1.788801  |
| 19 | 8 | 0 | 1.113485 | 0.352253  | -0.056148 |
| 20 | 6 | 0 | 2.265772 | -0.501424 | 0.150138  |
| 21 | 6 | 0 | 2.711224 | -1.115235 | -1.172223 |
| 22 | 6 | 0 | 3.624225 | 0.196353  | 0.124241  |
| 23 | 1 | 0 | 2.250519 | -0.632718 | -2.045898 |
| 24 | 1 | 0 | 2.643260 | -2.205495 | -1.265035 |
| 25 | 1 | 0 | 3.574021 | 1.248641  | -0.185244 |
| 26 | 1 | 0 | 4.247282 | 0.100330  | 1.020226  |
| 27 | 8 | 0 | 4.065882 | -0.665237 | -0.951274 |
| 28 | 6 | 0 | 2.012672 | -1.463386 | 1.283954  |
| 29 | 1 | 0 | 1.910878 | -0.930179 | 2.232479  |
| 30 | 1 | 0 | 1.101984 | -2.042174 | 1.098668  |
| 31 | 1 | 0 | 2.852916 | -2.158054 | 1.367091  |

---

Sum of electronic and zero-point Energies= -1255.799762

Sum of electronic and thermal Energies= -1255.782887

Sum of electronic and thermal Enthalpies= -1255.781943

Sum of electronic and thermal Free Energies= -1255.845086

**Table S3.** Standard orientation of **Int1** structure.

Standard orientation:

| -----  |        |        |                         |           |           |
|--------|--------|--------|-------------------------|-----------|-----------|
| Center | Atomic | Atomic | Coordinates (Angstroms) |           |           |
| Number | Number | Type   | X                       | Y         | Z         |
| -----  |        |        |                         |           |           |
| 1      | 16     | 0      | 2.298713                | 1.055835  | -1.065220 |
| 2      | 8      | 0      | 2.876038                | 1.432637  | -2.359083 |
| 3      | 8      | 0      | 0.826852                | 0.924999  | -1.041257 |
| 4      | 6      | 0      | 2.700393                | 2.335868  | 0.104142  |
| 5      | 6      | 0      | 4.037270                | 2.586087  | 0.424684  |
| 6      | 6      | 0      | 1.676589                | 3.129687  | 0.617351  |
| 7      | 6      | 0      | 4.345633                | 3.635390  | 1.288718  |
| 8      | 1      | 0      | 4.820605                | 1.959227  | 0.000000  |
| 9      | 6      | 0      | 1.993828                | 4.183344  | 1.476937  |
| 10     | 1      | 0      | 0.644107                | 2.914936  | 0.349040  |
| 11     | 6      | 0      | 3.325036                | 4.435120  | 1.813509  |
| 12     | 1      | 0      | 5.381744                | 3.832346  | 1.549932  |
| 13     | 1      | 0      | 1.200862                | 4.804348  | 1.885077  |
| 14     | 1      | 0      | 3.569689                | 5.253447  | 2.485489  |
| 15     | 6      | 0      | 2.996887                | -1.367534 | -1.065838 |
| 16     | 8      | 0      | 2.260890                | -1.679606 | -2.000655 |

|    |   |   |           |           |           |
|----|---|---|-----------|-----------|-----------|
| 17 | 8 | 0 | 3.838643  | -2.340577 | -0.590921 |
| 18 | 6 | 0 | 4.891243  | -2.000408 | 0.325338  |
| 19 | 6 | 0 | 6.113168  | -2.890428 | 0.090537  |
| 20 | 6 | 0 | 5.825032  | -0.864012 | -0.092194 |
| 21 | 1 | 0 | 6.070530  | -3.428205 | -0.866711 |
| 22 | 1 | 0 | 6.402532  | -3.576899 | 0.895509  |
| 23 | 1 | 0 | 5.669627  | -0.518174 | -1.124152 |
| 24 | 1 | 0 | 5.888234  | 0.000000  | 0.583982  |
| 25 | 8 | 0 | 6.976812  | -1.734245 | 0.023308  |
| 26 | 6 | 0 | 4.420501  | -1.948888 | 1.761931  |
| 27 | 1 | 0 | 3.819028  | -1.054837 | 1.953593  |
| 28 | 1 | 0 | 3.835493  | -2.839021 | 2.011240  |
| 29 | 1 | 0 | 5.287942  | -1.909693 | 2.428138  |
| 30 | 7 | 0 | 3.081200  | -0.188372 | -0.381388 |
| 31 | 1 | 0 | 1.953924  | -0.810579 | 1.051621  |
| 32 | 6 | 0 | 0.477218  | -0.335486 | 2.166569  |
| 33 | 8 | 0 | 1.054961  | -1.160642 | 1.284599  |
| 34 | 8 | 0 | 1.076036  | 0.487043  | 2.836101  |
| 35 | 6 | 0 | -1.025045 | -0.486743 | 2.113659  |
| 36 | 1 | 0 | -1.267264 | -1.524787 | 1.859519  |
| 37 | 1 | 0 | -1.476467 | -0.245499 | 3.076707  |
| 38 | 6 | 0 | -1.509009 | 0.488949  | 1.022666  |



|    |   |   |           |           |           |
|----|---|---|-----------|-----------|-----------|
| 39 | 1 | 0 | -0.707846 | 0.684422  | 0.296160  |
| 40 | 1 | 0 | -1.789531 | 1.456552  | 1.451785  |
| 41 | 6 | 0 | -3.414116 | 1.174983  | -1.068268 |
| 42 | 6 | 0 | -2.419728 | 1.979050  | -1.649039 |
| 43 | 6 | 0 | -4.752676 | 1.301847  | -1.469873 |
| 44 | 6 | 0 | -2.778535 | 2.925546  | -2.607007 |
| 45 | 1 | 0 | -1.370089 | 1.862079  | -1.376999 |
| 46 | 6 | 0 | -5.098403 | 2.251487  | -2.428197 |
| 47 | 1 | 0 | -5.521901 | 0.665253  | -1.035800 |
| 48 | 6 | 0 | -4.113388 | 3.065138  | -2.993454 |
| 49 | 1 | 0 | -2.011235 | 3.549121  | -3.056040 |
| 50 | 1 | 0 | -6.135212 | 2.352850  | -2.735103 |
| 51 | 1 | 0 | -4.385785 | 3.804503  | -3.741609 |
| 52 | 6 | 0 | -4.263645 | -0.453633 | 1.236127  |
| 53 | 6 | 0 | -4.422791 | -1.738302 | 1.777534  |
| 54 | 6 | 0 | -5.052595 | 0.609587  | 1.704036  |
| 55 | 6 | 0 | -5.386058 | -1.959987 | 2.760514  |
| 56 | 1 | 0 | -3.799174 | -2.561403 | 1.433428  |
| 57 | 6 | 0 | -6.013422 | 0.378267  | 2.685569  |
| 58 | 1 | 0 | -4.916599 | 1.613353  | 1.305520  |
| 59 | 6 | 0 | -6.182956 | -0.905492 | 3.210684  |
| 60 | 1 | 0 | -5.511390 | -2.956215 | 3.173604  |

|    |    |   |           |           |           |
|----|----|---|-----------|-----------|-----------|
| 61 | 1  | 0 | -6.626798 | 1.200612  | 3.041016  |
| 62 | 1  | 0 | -6.934579 | -1.082974 | 3.974558  |
| 63 | 6  | 0 | -2.459608 | -1.593248 | -0.801811 |
| 64 | 6  | 0 | -1.119132 | -1.787055 | -1.173357 |
| 65 | 6  | 0 | -3.455110 | -2.481068 | -1.243131 |
| 66 | 6  | 0 | -0.778953 | -2.888325 | -1.959154 |
| 67 | 1  | 0 | -0.334075 | -1.089128 | -0.878556 |
| 68 | 6  | 0 | -3.102167 | -3.576819 | -2.026101 |
| 69 | 1  | 0 | -4.499365 | -2.319011 | -0.980219 |
| 70 | 6  | 0 | -1.764868 | -3.782750 | -2.379269 |
| 71 | 1  | 0 | 0.263011  | -3.022010 | -2.239315 |
| 72 | 1  | 0 | -3.870609 | -4.266599 | -2.363181 |
| 73 | 1  | 0 | -1.494773 | -4.638251 | -2.992633 |
| 74 | 15 | 0 | -2.928524 | -0.109348 | 0.088997  |

---

|                                              |              |
|----------------------------------------------|--------------|
| Sum of electronic and zero-point Energies=   | -2558.953971 |
| Sum of electronic and thermal Energies=      | -2558.915928 |
| Sum of electronic and thermal Enthalpies=    | -2558.914984 |
| Sum of electronic and thermal Free Energies= | -2559.027523 |

**Table S4.** Standard orientation of **Int2** structure.

Standard orientation:

| -----  |        |        |                         |           |           |
|--------|--------|--------|-------------------------|-----------|-----------|
| Center | Atomic | Atomic | Coordinates (Angstroms) |           |           |
| Number | Number | Type   | X                       | Y         | Z         |
| -----  |        |        |                         |           |           |
| 1      | 16     | 0      | -2.723845               | 1.153614  | -0.600469 |
| 2      | 8      | 0      | -1.775255               | 1.479893  | 0.477847  |
| 3      | 8      | 0      | -2.500410               | 1.842184  | -1.879889 |
| 4      | 6      | 0      | -4.337516               | 1.639994  | -0.024781 |
| 5      | 6      | 0      | -4.733979               | 1.288944  | 1.268848  |
| 6      | 6      | 0      | -5.163381               | 2.397568  | -0.852688 |
| 7      | 6      | 0      | -5.983085               | 1.698632  | 1.731671  |
| 8      | 1      | 0      | -4.063691               | 0.709881  | 1.901916  |
| 9      | 6      | 0      | -6.412284               | 2.807673  | -0.379752 |
| 10     | 1      | 0      | -4.821930               | 2.661156  | -1.850484 |
| 11     | 6      | 0      | -6.822339               | 2.457433  | 0.907886  |
| 12     | 1      | 0      | -6.301691               | 1.431053  | 2.735713  |
| 13     | 1      | 0      | -7.063455               | 3.399752  | -1.017042 |
| 14     | 1      | 0      | -7.794436               | 2.778262  | 1.273884  |
| 15     | 7      | 0      | -2.966824               | -0.436664 | -0.726661 |
| 16     | 1      | 0      | -1.160447               | -3.013311 | 1.870988  |

|    |   |   |           |           |           |
|----|---|---|-----------|-----------|-----------|
| 17 | 6 | 0 | -1.901400 | -1.172503 | -1.097300 |
| 18 | 8 | 0 | -0.797651 | -0.814582 | -1.540778 |
| 19 | 8 | 0 | -2.064814 | -2.529637 | -0.958519 |
| 20 | 6 | 0 | -3.237932 | -3.063102 | -0.311204 |
| 21 | 6 | 0 | -2.801717 | -4.368156 | 0.359409  |
| 22 | 6 | 0 | -3.430440 | -2.560105 | 1.122926  |
| 23 | 1 | 0 | -1.824760 | -4.758030 | 0.054403  |
| 24 | 1 | 0 | -3.555664 | -5.163917 | 0.337082  |
| 25 | 1 | 0 | -2.925730 | -1.635898 | 1.413949  |
| 26 | 1 | 0 | -4.480024 | -2.529034 | 1.439500  |
| 27 | 8 | 0 | -2.754603 | -3.735761 | 1.669874  |
| 28 | 6 | 0 | -4.421049 | -3.090781 | -1.244585 |
| 29 | 1 | 0 | -4.708599 | -2.072485 | -1.515548 |
| 30 | 1 | 0 | -4.172619 | -3.641978 | -2.156302 |
| 31 | 1 | 0 | -5.273857 | -3.581571 | -0.766201 |
| 32 | 6 | 0 | -0.392972 | -1.284402 | 2.175569  |
| 33 | 8 | 0 | -0.337137 | -2.503964 | 1.631327  |
| 34 | 8 | 0 | -1.254206 | -0.929244 | 2.964270  |
| 35 | 6 | 0 | 0.726225  | -0.379589 | 1.712184  |
| 36 | 1 | 0 | 0.249606  | 0.575474  | 1.458850  |
| 37 | 1 | 0 | 1.373818  | -0.192908 | 2.578248  |
| 38 | 6 | 0 | 1.503960  | -0.939188 | 0.527452  |

|    |   |   |          |           |           |
|----|---|---|----------|-----------|-----------|
| 39 | 1 | 0 | 0.819792 | -1.092316 | -0.319550 |
| 40 | 1 | 0 | 1.951929 | -1.910683 | 0.766169  |
| 41 | 6 | 0 | 3.644848 | -0.700109 | -1.429959 |
| 42 | 6 | 0 | 2.849159 | -1.450388 | -2.309963 |
| 43 | 6 | 0 | 4.996694 | -0.465834 | -1.724300 |
| 44 | 6 | 0 | 3.417738 | -1.983057 | -3.465795 |
| 45 | 1 | 0 | 1.790387 | -1.609021 | -2.109267 |
| 46 | 6 | 0 | 5.554832 | -1.004026 | -2.881810 |
| 47 | 1 | 0 | 5.611531 | 0.133424  | -1.054297 |
| 48 | 6 | 0 | 4.767180 | -1.763562 | -3.750474 |
| 49 | 1 | 0 | 2.803171 | -2.565289 | -4.146067 |
| 50 | 1 | 0 | 6.602345 | -0.826457 | -3.106677 |
| 51 | 1 | 0 | 5.204460 | -2.179869 | -4.653825 |
| 52 | 6 | 0 | 4.050387 | 0.260815  | 1.328213  |
| 53 | 6 | 0 | 3.921619 | 1.328391  | 2.230066  |
| 54 | 6 | 0 | 5.006840 | -0.740545 | 1.557090  |
| 55 | 6 | 0 | 4.761501 | 1.403845  | 3.339532  |
| 56 | 1 | 0 | 3.168989 | 2.097342  | 2.065775  |
| 57 | 6 | 0 | 5.845276 | -0.655046 | 2.666811  |
| 58 | 1 | 0 | 5.097085 | -1.582378 | 0.872772  |
| 59 | 6 | 0 | 5.725389 | 0.416890  | 3.555295  |
| 60 | 1 | 0 | 4.660524 | 2.232025  | 4.034305  |

|    |    |   |           |           |           |
|----|----|---|-----------|-----------|-----------|
| 61 | 1  | 0 | 6.589839  | -1.426526 | 2.838242  |
| 62 | 1  | 0 | 6.381241  | 0.479467  | 4.418987  |
| 63 | 6  | 0 | 2.297056  | 1.722184  | -0.505488 |
| 64 | 6  | 0 | 0.966331  | 1.891399  | -0.909449 |
| 65 | 6  | 0 | 3.213495  | 2.783826  | -0.599335 |
| 66 | 6  | 0 | 0.547166  | 3.136903  | -1.378751 |
| 67 | 1  | 0 | 0.248593  | 1.071106  | -0.865747 |
| 68 | 6  | 0 | 2.785100  | 4.019180  | -1.074713 |
| 69 | 1  | 0 | 4.252688  | 2.647668  | -0.301575 |
| 70 | 6  | 0 | 1.451344  | 4.195814  | -1.461325 |
| 71 | 1  | 0 | -0.492717 | 3.254982  | -1.675686 |
| 72 | 1  | 0 | 3.489208  | 4.843608  | -1.143397 |
| 73 | 1  | 0 | 1.121276  | 5.164231  | -1.828744 |
| 74 | 15 | 0 | 2.872050  | 0.097025  | -0.017133 |

-----

|                                              |              |
|----------------------------------------------|--------------|
| Sum of electronic and zero-point Energies=   | -2558.963519 |
| Sum of electronic and thermal Energies=      | -2558.924495 |
| Sum of electronic and thermal Enthalpies=    | -2558.923551 |
| Sum of electronic and thermal Free Energies= | -2559.037997 |

**Table S5.** Standard orientation of **TS** structure.

Standard orientation:

| -----  |        |        |                         |           |           |
|--------|--------|--------|-------------------------|-----------|-----------|
| Center | Atomic | Atomic | Coordinates (Angstroms) |           |           |
| Number | Number | Type   | X                       | Y         | Z         |
| -----  |        |        |                         |           |           |
| 1      | 16     | 0      | 2.750514                | -0.972034 | -1.119227 |
| 2      | 8      | 0      | 1.621732                | -1.434833 | -0.303100 |
| 3      | 8      | 0      | 2.892986                | -1.528546 | -2.463315 |
| 4      | 6      | 0      | 4.232557                | -1.318356 | -0.206446 |
| 5      | 6      | 0      | 4.142573                | -1.466263 | 1.179639  |
| 6      | 6      | 0      | 5.444521                | -1.454708 | -0.884997 |
| 7      | 6      | 0      | 5.303020                | -1.756390 | 1.898222  |
| 8      | 1      | 0      | 3.180779                | -1.348216 | 1.681406  |
| 9      | 6      | 0      | 6.597007                | -1.743353 | -0.152979 |
| 10     | 1      | 0      | 5.476006                | -1.348397 | -1.966617 |
| 11     | 6      | 0      | 6.525398                | -1.894080 | 1.234975  |
| 12     | 1      | 0      | 5.250545                | -1.875829 | 2.976944  |
| 13     | 1      | 0      | 7.548522                | -1.855249 | -0.665581 |
| 14     | 1      | 0      | 7.425002                | -2.123746 | 1.800103  |
| 15     | 7      | 0      | 2.801971                | 0.672464  | -1.118911 |
| 16     | 1      | 0      | 1.783408                | 2.273307  | 2.605290  |

|    |   |   |           |           |           |
|----|---|---|-----------|-----------|-----------|
| 17 | 6 | 0 | 1.642597  | 1.274404  | -1.513408 |
| 18 | 8 | 0 | 0.724152  | 0.845055  | -2.207933 |
| 19 | 8 | 0 | 1.520694  | 2.538781  | -0.990254 |
| 20 | 6 | 0 | 2.556445  | 2.880605  | -0.052244 |
| 21 | 6 | 0 | 2.002653  | 3.642490  | 1.141988  |
| 22 | 6 | 0 | 2.953608  | 1.666786  | 0.769680  |
| 23 | 1 | 0 | 0.910724  | 3.591128  | 1.199173  |
| 24 | 1 | 0 | 2.348136  | 4.672571  | 1.252724  |
| 25 | 1 | 0 | 2.223547  | 0.929651  | 1.080855  |
| 26 | 1 | 0 | 3.996710  | 1.419211  | 0.937931  |
| 27 | 8 | 0 | 2.605977  | 2.798898  | 2.165246  |
| 28 | 6 | 0 | 3.712519  | 3.552077  | -0.758921 |
| 29 | 1 | 0 | 4.157698  | 2.873027  | -1.489449 |
| 30 | 1 | 0 | 3.362590  | 4.451208  | -1.271722 |
| 31 | 1 | 0 | 4.479382  | 3.843548  | -0.035227 |
| 32 | 6 | 0 | 0.621506  | 0.312615  | 2.665907  |
| 33 | 8 | 0 | 0.533222  | 1.595367  | 2.742596  |
| 34 | 8 | 0 | 1.598539  | -0.375101 | 3.012552  |
| 35 | 6 | 0 | -0.608916 | -0.366424 | 2.048847  |
| 36 | 1 | 0 | -0.375093 | -1.411161 | 1.823902  |
| 37 | 1 | 0 | -1.413682 | -0.350930 | 2.795502  |
| 38 | 6 | 0 | -1.043410 | 0.396058  | 0.799953  |



|    |   |   |           |           |           |
|----|---|---|-----------|-----------|-----------|
| 39 | 1 | 0 | -0.270435 | 0.344555  | 0.018393  |
| 40 | 1 | 0 | -1.184463 | 1.454057  | 1.055818  |
| 41 | 6 | 0 | -3.124008 | 1.045659  | -1.156820 |
| 42 | 6 | 0 | -2.281726 | 2.090350  | -1.560021 |
| 43 | 6 | 0 | -4.389371 | 0.886837  | -1.746089 |
| 44 | 6 | 0 | -2.719438 | 2.984100  | -2.538020 |
| 45 | 1 | 0 | -1.283114 | 2.198271  | -1.140690 |
| 46 | 6 | 0 | -4.817608 | 1.785196  | -2.718277 |
| 47 | 1 | 0 | -5.038934 | 0.065232  | -1.445309 |
| 48 | 6 | 0 | -3.982787 | 2.835969  | -3.112274 |
| 49 | 1 | 0 | -2.067103 | 3.793300  | -2.853254 |
| 50 | 1 | 0 | -5.797948 | 1.665292  | -3.169540 |
| 51 | 1 | 0 | -4.317713 | 3.536334  | -3.872572 |
| 52 | 6 | 0 | -3.840066 | -0.351998 | 1.319949  |
| 53 | 6 | 0 | -3.802826 | -1.473260 | 2.166363  |
| 54 | 6 | 0 | -4.791445 | 0.655427  | 1.532907  |
| 55 | 6 | 0 | -4.721084 | -1.586552 | 3.207082  |
| 56 | 1 | 0 | -3.063512 | -2.257101 | 2.009705  |
| 57 | 6 | 0 | -5.709594 | 0.532270  | 2.575053  |
| 58 | 1 | 0 | -4.815658 | 1.530853  | 0.887356  |
| 59 | 6 | 0 | -5.675906 | -0.586536 | 3.409643  |
| 60 | 1 | 0 | -4.691514 | -2.455825 | 3.856992  |

|    |    |   |           |           |           |
|----|----|---|-----------|-----------|-----------|
| 61 | 1  | 0 | -6.448962 | 1.311286  | 2.734593  |
| 62 | 1  | 0 | -6.393559 | -0.679859 | 4.220036  |
| 63 | 6  | 0 | -2.334752 | -1.741955 | -0.779351 |
| 64 | 6  | 0 | -1.156330 | -1.910551 | -1.522305 |
| 65 | 6  | 0 | -3.322656 | -2.738972 | -0.779637 |
| 66 | 6  | 0 | -0.955034 | -3.093573 | -2.229684 |
| 67 | 1  | 0 | -0.392004 | -1.134374 | -1.554143 |
| 68 | 6  | 0 | -3.113162 | -3.914724 | -1.497522 |
| 69 | 1  | 0 | -4.246944 | -2.601753 | -0.221155 |
| 70 | 6  | 0 | -1.928348 | -4.095130 | -2.216443 |
| 71 | 1  | 0 | -0.033655 | -3.225995 | -2.790787 |
| 72 | 1  | 0 | -3.874476 | -4.689601 | -1.493553 |
| 73 | 1  | 0 | -1.766546 | -5.016701 | -2.769476 |
| 74 | 15 | 0 | -2.584251 | -0.169191 | 0.049828  |

---

|                                              |              |
|----------------------------------------------|--------------|
| Sum of electronic and zero-point Energies=   | -2558.928504 |
| Sum of electronic and thermal Energies=      | -2558.890336 |
| Sum of electronic and thermal Enthalpies=    | -2558.889392 |
| Sum of electronic and thermal Free Energies= | -2558.999571 |

**Table S6.** Standard orientation of **C1+4b** structure.

Standard orientation:

| -----  |        |        |                         |           |           |
|--------|--------|--------|-------------------------|-----------|-----------|
| Center | Atomic | Atomic | Coordinates (Angstroms) |           |           |
| Number | Number | Type   | X                       | Y         | Z         |
| -----  |        |        |                         |           |           |
| 1      | 16     | 0      | 2.498639                | -0.815871 | -1.079764 |
| 2      | 8      | 0      | 1.314344                | -1.210325 | -0.337884 |
| 3      | 8      | 0      | 2.499556                | -0.918421 | -2.528697 |
| 4      | 6      | 0      | 3.902135                | -1.639798 | -0.405123 |
| 5      | 6      | 0      | 3.877474                | -1.983898 | 0.949579  |
| 6      | 6      | 0      | 4.982075                | -1.934898 | -1.239291 |
| 7      | 6      | 0      | 4.984203                | -2.648543 | 1.476092  |
| 8      | 1      | 0      | 3.018347                | -1.712284 | 1.567720  |
| 9      | 6      | 0      | 6.076979                | -2.604166 | -0.693628 |
| 10     | 1      | 0      | 4.954426                | -1.653161 | -2.288542 |
| 11     | 6      | 0      | 6.076005                | -2.957184 | 0.658934  |
| 12     | 1      | 0      | 4.993575                | -2.926297 | 2.525906  |
| 13     | 1      | 0      | 6.927545                | -2.850565 | -1.322131 |
| 14     | 1      | 0      | 6.932153                | -3.478736 | 1.078751  |
| 15     | 7      | 0      | 2.883831                | 0.808887  | -0.702600 |
| 16     | 1      | 0      | 2.270896                | 2.316925  | 2.440893  |

|    |   |   |           |           |           |
|----|---|---|-----------|-----------|-----------|
| 17 | 6 | 0 | 1.899759  | 1.778514  | -0.893154 |
| 18 | 8 | 0 | 0.865656  | 1.649352  | -1.524169 |
| 19 | 8 | 0 | 2.290651  | 2.911904  | -0.298165 |
| 20 | 6 | 0 | 3.636681  | 2.740968  | 0.289662  |
| 21 | 6 | 0 | 3.657472  | 3.468745  | 1.634032  |
| 22 | 6 | 0 | 3.769112  | 1.218752  | 0.393755  |
| 23 | 1 | 0 | 3.165504  | 4.443824  | 1.458429  |
| 24 | 1 | 0 | 4.707950  | 3.688364  | 1.869315  |
| 25 | 1 | 0 | 3.405686  | 0.844492  | 1.361525  |
| 26 | 1 | 0 | 4.797306  | 0.890782  | 0.218450  |
| 27 | 8 | 0 | 3.119100  | 2.775137  | 2.717857  |
| 28 | 6 | 0 | 4.618938  | 3.357102  | -0.687691 |
| 29 | 1 | 0 | 4.540337  | 2.882309  | -1.670143 |
| 30 | 1 | 0 | 4.420498  | 4.426317  | -0.803379 |
| 31 | 1 | 0 | 5.642755  | 3.232931  | -0.324302 |
| 32 | 6 | 0 | 0.792439  | 0.267321  | 2.198337  |
| 33 | 8 | 0 | 0.930936  | 1.508702  | 1.953446  |
| 34 | 8 | 0 | 1.623409  | -0.495002 | 2.743719  |
| 35 | 6 | 0 | -0.567766 | -0.330467 | 1.780980  |
| 36 | 1 | 0 | -0.395736 | -1.325156 | 1.355795  |
| 37 | 1 | 0 | -1.175015 | -0.464611 | 2.685999  |
| 38 | 6 | 0 | -1.268064 | 0.591608  | 0.792109  |

|    |   |   |           |           |           |
|----|---|---|-----------|-----------|-----------|
| 39 | 1 | 0 | -0.594428 | 0.826109  | -0.043313 |
| 40 | 1 | 0 | -1.509330 | 1.548692  | 1.268359  |
| 41 | 6 | 0 | -3.549685 | 1.261643  | -0.904144 |
| 42 | 6 | 0 | -2.828690 | 2.424441  | -1.209575 |
| 43 | 6 | 0 | -4.827328 | 1.060541  | -1.451667 |
| 44 | 6 | 0 | -3.392741 | 3.385846  | -2.048362 |
| 45 | 1 | 0 | -1.830575 | 2.583566  | -0.808271 |
| 46 | 6 | 0 | -5.383543 | 2.027192  | -2.285164 |
| 47 | 1 | 0 | -5.386935 | 0.152663  | -1.229272 |
| 48 | 6 | 0 | -4.666194 | 3.189694  | -2.584052 |
| 49 | 1 | 0 | -2.831995 | 4.285209  | -2.284803 |
| 50 | 1 | 0 | -6.373150 | 1.872057  | -2.704636 |
| 51 | 1 | 0 | -5.100477 | 3.940188  | -3.238733 |
| 52 | 6 | 0 | -3.919827 | -0.554180 | 1.388526  |
| 53 | 6 | 0 | -3.641187 | -1.745160 | 2.080167  |
| 54 | 6 | 0 | -4.991324 | 0.255734  | 1.788557  |
| 55 | 6 | 0 | -4.437094 | -2.122360 | 3.158554  |
| 56 | 1 | 0 | -2.805665 | -2.374683 | 1.776946  |
| 57 | 6 | 0 | -5.786466 | -0.132033 | 2.866742  |
| 58 | 1 | 0 | -5.201724 | 1.185178  | 1.262973  |
| 59 | 6 | 0 | -5.510300 | -1.317632 | 3.550668  |
| 60 | 1 | 0 | -4.218526 | -3.042597 | 3.692156  |

|    |    |   |           |           |           |
|----|----|---|-----------|-----------|-----------|
| 61 | 1  | 0 | -6.619009 | 0.494293  | 3.173209  |
| 62 | 1  | 0 | -6.130191 | -1.614341 | 4.392069  |
| 63 | 6  | 0 | -2.453279 | -1.433415 | -0.990327 |
| 64 | 6  | 0 | -1.325706 | -1.364034 | -1.822361 |
| 65 | 6  | 0 | -3.339543 | -2.516141 | -1.089411 |
| 66 | 6  | 0 | -1.075745 | -2.390822 | -2.730475 |
| 67 | 1  | 0 | -0.636993 | -0.521351 | -1.760735 |
| 68 | 6  | 0 | -3.084926 | -3.534526 | -2.005863 |
| 69 | 1  | 0 | -4.222281 | -2.565493 | -0.454405 |
| 70 | 6  | 0 | -1.953495 | -3.473715 | -2.823568 |
| 71 | 1  | 0 | -0.191870 | -2.340856 | -3.360399 |
| 72 | 1  | 0 | -3.768784 | -4.375228 | -2.079734 |
| 73 | 1  | 0 | -1.756422 | -4.272171 | -3.534005 |
| 74 | 15 | 0 | -2.797625 | -0.036413 | 0.087124  |

---

|                                              |              |
|----------------------------------------------|--------------|
| Sum of electronic and zero-point Energies=   | -2558.995437 |
| Sum of electronic and thermal Energies=      | -2558.956669 |
| Sum of electronic and thermal Enthalpies=    | -2558.955724 |
| Sum of electronic and thermal Free Energies= | -2559.068438 |
